1 **Identification of the critical replication targets of CDK**  
2 **reveals direct regulation of replication initiation**  
3 **factors by the embryo polarity machinery in *C.***  
4 ***elegans***

5

6 Short title: Embryo polarity directly regulates replication initiation factors

7

8 Vincent Gaggioli<sup>1,4</sup>, Manuela R. Kieninger<sup>1</sup>, Anna Klucnika<sup>1,3</sup>, Richard Butler<sup>1</sup>  
9 and Philip Zegerman<sup>\*1,2</sup>

10

11 <sup>^</sup>These authors contributed equally

12 <sup>1</sup> Wellcome Trust/Cancer Research UK Gurdon Institute, The Henry Wellcome

13 Building of Cancer and Developmental Biology, University of Cambridge CB2 1QN,

14 UK

15 <sup>2</sup> Department of Biochemistry, University of Cambridge, UK.

16 <sup>3</sup> Department of Genetics, University of Cambridge, UK.

17 <sup>4</sup> Current address: Department of Molecular Genetics, Erasmus University Medical

18 Center, Dr. Molewaterplein 40, 3015GD Rotterdam, The Netherlands

19 \* Corresponding author. e-mail: [p.zegerman@gurdon.cam.ac.uk](mailto:p.zegerman@gurdon.cam.ac.uk)

20 Tel: +44 (0)1223-334132

21

## 21 **Abstract**

22 During metazoan development, the cell cycle is remodelled to coordinate proliferation  
23 with differentiation. Developmental cues cause dramatic changes in the number and  
24 timing of replication initiation events, but the mechanisms and physiological  
25 importance of such changes are poorly understood. Cyclin-dependent kinase (CDK)  
26 is important for regulating S-phase length in many metazoa, and here we show in the  
27 nematode *Caenorhabditis elegans* that an essential function of CDK during early  
28 embryogenesis is to regulate the interactions between three replication initiation  
29 factors SLD-3, SLD-2 and MUS-101 (Dpb11/TopBP1). Mutations that bypass the  
30 requirement for CDK to generate interactions between these factors is sufficient for  
31 viability in the absence of CyclinE/Cdk2, demonstrating that this is a critical  
32 embryonic function of this cyclin/CDK complex. Both SLD-2 and SLD-3 are  
33 asymmetrically localised in the early embryo and the levels of these proteins  
34 inversely correlate with S-phase length. We also show that SLD-2 asymmetry is  
35 determined by direct interaction with the polarity protein PKC-3. This study explains  
36 the essential function of CDK for replication initiation in a metazoan and provides the  
37 first direct molecular mechanism through which polarization of the embryo is  
38 coordinated with DNA replication initiation.

39

## 39 **Author Summary**

40 How and when a cell divides changes as the cell assumes different fates. How these  
41 changes in cell division are brought about are poorly understood, but are critical to  
42 ensure that cells do not over-proliferate leading to cancer. The nematode *C. elegans*  
43 is an excellent system to study the role of cell cycle changes during animal  
44 development. Here we show that two factors SLD-2 and SLD-3 are critical to control  
45 the decision to begin genome duplication. We show that these factors are differently  
46 distributed to different cell lineages in the early embryo, which may be a key event in  
47 determining the cell cycle rate in these cells. For the first time we show that, PKC-3,  
48 a key component of the machinery that determines the front (anterior) from the back  
49 (posterior) of the embryo directly controls SLD-2 distribution, which might explain  
50 how the polarisation of the embryo causes changes in the proliferation of different  
51 cell lineages. As PKC-3 is frequently mutated in human cancers, how this factor  
52 controls cell proliferation may be important to understand tumour progression.

## 53 **Introduction**

54 Eukaryotes replicate their genomes from multiple origins that fire throughout S-phase  
55 of the cell cycle. Programmed changes in the number, timing and position of origin  
56 firing occur during differentiation and development across many metazoa [1]. As a  
57 result, different cell types exhibit dramatic changes in the rate of S-phase and the  
58 timing with which different parts of the genome are replicated. The mechanisms and  
59 physiological importance of such changes in genome duplication during the lifetime  
60 of an organism are very poorly understood. With its highly stereotypical cell divisions,  
61 the early *C. elegans* embryo provides an ideal system to study the role of cell cycle  
62 control during development. As early as the second embryonic division, polarity cues  
63 generate cells with different S-phase lengths [2,3]. Activators of cyclin-dependent  
64 kinase (CDK) are asymmetrically distributed in the early embryo [2,4-6] and CDK  
65 activity has been shown to be important for determining the synchrony of division [6].  
66 Despite this, how CDK controls embryonic cell cycle length is not known.

67 CDK plays a critical role in the initiation of DNA replication across eukaryotes [7]. In  
68 budding yeast CDK phosphorylates two essential initiation factors Sld2 and Sld3,  
69 which results in their phospho-dependent interaction with the BRCT repeats of  
70 Dpb11 [8,9]. This CDK-dependent complex results in the recruitment of additional  
71 proteins, such as the leading strand polymerase (Pol  $\epsilon$ ) and helicase activatory  
72 factors, which together allow replisome assembly by a poorly understood mechanism  
73 [10]. Phosphorylation of Sld2 and Sld3 and interaction with Dpb11 is sufficient for the  
74 function of CDK in replication initiation in yeast, as mutations that drive the  
75 interactions between these proteins can bypass the requirement for CDK to initiate  
76 replication [8,9].

77 Importantly, Sld3, Sld2 and Dpb11, together with another replication initiation factor  
78 Dbf4 are low abundance and rate limiting for replication initiation in yeast [11,12]. The

79 orthologues of these same factors are also limiting for S-phase length during the  
80 early embryonic divisions in *Xenopus* [13]. In *Drosophila*, increasing CDK activity is  
81 sufficient to reduce S-phase length in the early embryo [14], although the same is not  
82 true in *Xenopus* or zebrafish [15,16]. It would therefore seem that limiting CDK  
83 activity and/or low levels of the key CDK substrates, Sld3 and Sld2 and their binding  
84 partners might provide a simple mechanistic explanation for how diverse organisms  
85 regulate the rate of replication initiation and thus total S-phase length. Unfortunately  
86 the testing of this hypothesis has been hampered by the difficulties in identifying the  
87 true targets of CDK in replication initiation in developmental model systems [17].

88 We have previously provided the first example of an essential CDK substrate  
89 required for replication initiation in a metazoan through the characterisation of *C.*  
90 *elegans sld-2* [18]. Mutation of the CDK sites in *sld-2* to alanine prevented the  
91 interaction with the Dpb11 orthologue MUS-101 (also known as Cut5/TopBP1) and  
92 resulted in lethality, while phospho-mimicking mutations in these CDK sites restored  
93 the interaction with MUS-101 and restored viability [18]. Having characterised *sld-2*  
94 as an essential CDK target in *C. elegans* we set out to identify and characterise the  
95 Sld3 orthologue in this organism to determine the importance of regulation of both of  
96 these substrates during development. In this study we show that CDK-dependent  
97 regulation of *sld-2* and *sld-3* is sufficient to fulfil at least in part the essential functions  
98 of cyclin E/Cdk2 in *C. elegans*. Both SLD-2 and SLD-3 are asymmetrically localised  
99 in the early embryo and the asymmetry of SLD-2 is directly regulated by an  
100 interaction with the polarity factor PKC-3. This study provides the first direct link  
101 between the cell polarity machinery and DNA replication control and pinpoints *sld-2*  
102 and *sld-3* as potentially key factors for determining S-phase length in the early  
103 embryo in *C. elegans*.

## 104 **Results**

### 105 **ZK484.4 is *C. elegans* SLD-3**

106 To identify the CDK target Sld3/Treslin in *C. elegans*, we performed homology  
107 searches using the conserved Cdc45 interaction domain (also known as the  
108 Sld3/Treslin domain, orange, Fig 1A) [19,20]. From this, we identified ZK484.4 as the  
109 best-hit for a potential orthologue of Sld3/Treslin in *C. elegans* (Fig 1A). To determine  
110 whether ZK484.4 is a functional orthologue of Sld3, we first analysed the interactions  
111 of this protein with the replication initiation factors CDC-45 and MUS-101, the *C.*  
112 *elegans* orthologue of Dpb11/TopBP1. Yeast two-hybrid analysis revealed that the  
113 Sld3/Treslin domain of ZK484.4 (151-388) interacted with *C. elegans* CDC-45, while  
114 the C-terminus of SLD-3 (388-873) interacted with MUS-101 (Fig 1B). Interestingly  
115 ZK484.4 interacted with the region of MUS-101 (1-448) encompassing the N-terminal  
116 BRCT repeats (Fig 1B), which is the same region of interaction between Sld3-Dpb11  
117 in yeast and Treslin-TopBP1 in *Xenopus*/humans [8,9,21,22]. These conserved  
118 interactions strongly suggested that ZK484.4 is indeed the *C. elegans* orthologue of  
119 Sld3/Treslin and we hereby refer to ZK484.4 as *sld-3*. Notably we did not identify an  
120 orthologue of the Sld3/Treslin interacting protein Sld7/MTBP [23].

121 As Sld3/Treslin is essential for replication initiation across eukaryotes we set out to  
122 test whether *sld-3* is also essential in *C. elegans*. RNAi of *sld-3* by injection indeed  
123 showed that this is an essential gene (Fig 1C). Consistently with a role for *sld-3* in  
124 DNA replication, partial knock down of *sld-3* through RNAi by feeding resulted in  
125 synthetic lethality with the *div-1* mutant in the B subunit of polymerase alpha [24] at  
126 the semi-permissive temperature (Fig 1D). Together these data confirm that ZK484.4  
127 is likely to be the functional orthologue of *sld-3*.

### 128 ***C. elegans* SLD-3 has two essential CDK sites**

129 Sld3/Treslin is a critical CDK substrate in yeast, *Xenopus* extracts and human cells

130 and CDK phosphorylation of Sld3/Treslin at two sites mediates the interaction with  
131 the N-terminal BRCT repeats of Dpb11/TopBP1 [8,9,21,25]. As *C. elegans* SLD-3  
132 also interacts with the N-terminal region of MUS-101 (Fig 1B), we set out to  
133 determine whether CDK sites were crucial for this interaction. *C. elegans sld-3* has  
134 two CDK sites at positions 438 and 487, which show homology to the two essential  
135 sites in Sld3/Treslin (Fig 2A). Mutation of threonine 438 and 487 to alanine (hereafter  
136 called the 2A mutant) prevented the interaction between SLD-3 and MUS-101 (Fig  
137 2B). To test whether this interaction is important *in vivo*, we inserted in the genome at  
138 a MosSCI site an additional RNAi insensitive copy of either wild type or *sld-3(2A)*  
139 fused to mCherry [26]. The expression of these MosSCI alleles was similar, as  
140 determined by mCherry fluorescence levels (see for example Fig S3B). Importantly,  
141 while the *sld-3* wild type allele fully rescued the *sld-3* RNAi lethality, the 2A mutant  
142 that cannot interact with MUS-101 could not rescue this lethality (Fig 2C). This  
143 suggests that the interaction between SLD-3 and MUS-101 is critical *in vivo* in *C.*  
144 *elegans*.

145 As phosphorylation of Sld3/Treslin is required for the interaction with Dpb11/TopBP1  
146 [8,9,21,25] we wondered whether this was also the case in *C. elegans*. Significantly,  
147 mutation of the two essential CDK sites to aspartic acid (2D) or glutamic acid (2E),  
148 which potentially mimics phosphorylation of these sites, restored the interactions with  
149 MUS-101 (Fig 2B). Critically, while *sld-3* RNAi resulted in high levels of lethality as  
150 previously shown, an RNAi insensitive copy of *sld-3(2D)* partially rescued this  
151 lethality, while the *sld-3(2E)* allele almost fully rescued the loss of wild type *sld-3* (Fig  
152 2D), unlike the situation for human Treslin [27]. Together this shows that mutations  
153 that mimic phosphorylation of *sld-3* at these two essential sites allow MUS-101  
154 interaction and restore viability *in vivo*.

155 Since expression of the *sld-3(2D)* or *(2E)* mutants as a second copy restored viability  
156 after *sld-3* RNAi, we set out to generate these alleles at the endogenous locus by

157 CRISPR. While heterozygotes of the CRISPR-generated *sld-3(2D)* and *(2E)* mutants  
158 were viable, the homozygotes were sterile (Fig 2E). We wondered whether instead of  
159 mutating both CDK sites, mutation of just one site might be sufficient to generate  
160 viable alleles. Strains that were homozygous for either T438 or T487 mutated to  
161 alanine resulted in intermediate levels of embryonic death and infertility (Fig S1).  
162 While mutation of these individual sites to aspartic acid did not rescue the  
163 lethality/sterility, mutation of these sites to glutamic acid significantly reduced the  
164 lethality exhibited by the alanine mutants (Fig S1). Together with the analysis of the  
165 *sld-3* alleles as a second copy (Fig 2D), these data show that while alanine mutants  
166 of either of the two, or both CDK sites show lethality, phospho-mimicking mutants  
167 can bypass and rescue to some extent this lethality *in vivo*.

168 We are not sure why the *sld-3(2E)* allele shows high levels of viability after *sld-3*  
169 RNAi (Fig 2D), but not as a homozygous allele at the endogenous locus (Fig 2E).  
170 One possibility is that constitutive phospho-mimicking of these sites generates  
171 phenotypic issues by itself, indeed the CDK bypass mutants of Sld3 alone are sick in  
172 yeast [8]. We consider it more likely however that these alleles are simply not fully  
173 penetrant in mimicking the essential functions of *sld-3* and therefore behave as  
174 hypomorphs, which are viable in the presence of some background level of wild type  
175 protein (e.g after RNAi). Despite this, the phospho-mimicking mutants of the CDK  
176 sites in *sld-3*, which allow MUS-101 interaction, show dramatic rescue of *sld-3* RNAi  
177 lethality (Fig 2D) *in vivo*.

### 178 **Bypass of CDK site phosphorylation in SLD-3 and SLD-2 is partially sufficient** 179 **for cyclin E/CDK2 function**

180 In yeast, phospho-mimicking mutants of Sld2 and Sld3 fulfil the essential functions of  
181 CDK in DNA replication initiation [8,9]. In a previous study we characterised the Sld2  
182 orthologue in *C. elegans* and identified the *sld-2(8D)* mutant as capable of bypassing



183 the requirement for the CDK sites in *sld-2* to allow interaction with the C-terminus of  
184 MUS-101 [18]. Here we have identified the *sld-3(2D)* and *(2E)* mutants that can  
185 bypass the requirement for the CDK sites to generate the crucial interaction between  
186 SLD-3 and the N-terminus of MUS-101 (Fig 2). Therefore we wondered to what  
187 extent the combination of these bypass mutants of *sld-3* and *sld-2* might be able to  
188 fulfil essential functions of CDK in *C. elegans* (Fig 3A). As in yeast, we might expect  
189 such CDK bypass mutants to be dominant, which is indeed the case for *sld-2(8D)*  
190 [18]. Combination of the CDK bypass mutant *sld-2(8D)* with *sld-3(2D)* or *(2E)*,  
191 expressed as extra copies at MosSCI sites, resulted in wild type levels of fertility and  
192 viability (Fig 3B and S2A).

193 Cyclin E/CDK2 is required for the G1-S transition and is responsible for DNA  
194 replication initiation, particularly in early embryonic divisions such as in *Drosophila*  
195 and *Xenopus* [28,29]. RNAi of either Cyclin E (*cye-1*) or *cdk-2* resulted in embryonic  
196 lethality, as expected [30] (Fig 3C-D and S2B). Expression of the *sld-2* or *sld-3*  
197 bypass alleles alone did not restore viability after *cye-1* or *cdk-2* RNAi (Fig S2B-C).  
198 Importantly combination of both *sld-2(8D)* and *sld-3(2D)* or *(2E)* resulted in significant  
199 rescue of viability of both *cye-1* and *cdk-2* RNAi (Fig 3C-D). These phenotypic  
200 rescues by the *sld-2/sld-3* bypass mutants were specific to cyclinE/Cdk2 RNAi, as we  
201 did not observe any rescue with Cyclin B1 (*cyb-1*) or Cyclin B3 (*cyb-3*) RNAi (Fig  
202 S2D-E). Unfortunately RNAi of *cya-1* (Cyclin A) had no phenotype in our hands (data  
203 not shown). Together these data show that *sld-2* and *sld-3* mutants that can bypass  
204 the requirement for the critical CDK sites for generating interactions with MUS-101  
205 can fulfil some of the essential functions of Cyclin E/Cdk2 *in vivo* in *C. elegans*.

## 206 **SLD-2 and SLD-3 are asymmetrically localised in the early embryo**

207 During the second embryonic division in *C. elegans*, the anterior AB cell has a faster  
208 cell cycle than the posterior P1 cell, which is in part due to a shorter S-phase in the

209 AB cell [2]. CDK activity is potentially differentially activated in these two cells due to  
210 the asymmetric distribution of CDK regulators, such as *cdc-25* and the cyclin *cyb-3*  
211 [4,6]. We wondered to what extent SLD-2 and SLD-3 regulation by CDK might  
212 contribute to this asynchrony of cell division, so we analysed the AB/P1 cell cycle  
213 duration using the *sl-d-2/sl-d-3* CDK bypass alleles. Fig 4A shows that the duration of  
214 the AB and P1 divisions remained very similar in the *sl-d-2(8D)/sl-d-2(2E)* mutant  
215 relative to wild type, suggesting that CDK phosphorylation of these targets alone is  
216 not limiting for S-phase duration in either of these cell divisions.

217 During this analysis of AB/P1 cycle length using the MosSCI *sl-d-3* and *sl-d-2* alleles,  
218 which are tagged with mCherry and GFP respectively, we observed that both SLD-3  
219 and SLD-2 showed asymmetric localisation, with more protein in the AB cell nucleus,  
220 than P1 (Fig 4B/4C). This asymmetry was not limited to the MosSCI alleles, as we  
221 obtained a similar result using immuno-fluorescence of endogenous SLD-2 (Fig 4D).  
222 Interestingly the presence or absence of the essential CDK sites did not affect the  
223 asymmetric localisation of SLD-3 (Fig S3A-B). The asymmetry we observed was not  
224 an artefact of embryo staging, as the difference in abundance of SLD-2 was detected  
225 throughout interphase (Fig S3C).

226 Asymmetric and asynchronous divisions continue beyond the 2-cell stage, with the  
227 descendants of the AB cell (ABa and Abp) having shorter cell cycles than the  
228 descendants of the P1 cell (EMS and P2) with P2 having the longest S-phase of  
229 these cells [3,31]. We analysed the abundance of SLD-2 and SLD-3 in 4-cell stage  
230 embryos and these two proteins remained asymmetric at this stage with EMS and P2  
231 having significantly less protein than the AB cell lineage (Fig 4E-F). SLD-2  
232 abundance was also significantly lower in the P2 cell than the EMS cell (Fig 4F).  
233 Together these data show that SLD-2 and SLD-3 are present at levels that inversely  
234 correlate with S-phase length in the 2- and 4-cell *C. elegans* embryo.

## 235 **PAR proteins control SLD-2 asymmetry**

236 The PAR polarity proteins (PAR-1 to -6) and PKC-3, which specify the anterior-  
237 posterior (A–P) axis in the early embryo, also regulate the asynchrony of cell division  
238 between the AB and P1 blastomeres [2]. *par-3* and *pkc-3* mutants divide  
239 synchronously and symmetrically at the 2-cell stage [2,32] and significantly loss of  
240 function of either of these polarity genes resulted in subsequent symmetrical  
241 localisation of SLD-2 in the AB and P1 cell (Fig 5A-5B).

242 We have previously shown in *Xenopus* that nuclear-to-cytoplasmic ratios can affect  
243 S-phase length due to the amount of limiting replication initiation factors inherited  
244 after cell division [13]. As *par-3* and *pkc-3* mutants divide symmetrically (Fig 5A), we  
245 wondered whether the subsequent symmetry of SLD-2 was simply a consequence of  
246 equal distribution of cellular content after division. To test this we analysed the  
247 distribution of SLD-2 in *par-4* mutant embryos, which divide synchronously but still  
248 asymmetrically at the 2-cell stage, resulting in AB/P1 cells of similar size to wild type  
249 [33]. Significantly, SLD-2 was symmetrically localised in *par-4* mutant embryos, even  
250 though the P1 cell is smaller than the AB cell in these mutants (Fig 5C-D). Together  
251 this suggests that SLD-2 localisation is actively regulated by the PAR protein network  
252 not simply by the cellular volume at division.

253

## 254 **PKC-3 interacts with SLD-2 and causes SLD-2 asymmetry in the embryo**

255 To understand the molecular mechanism of SLD-2 asymmetry, we performed a yeast  
256 two-hybrid screen between SLD-2 and a cDNA library from *C. elegans* embryos (data  
257 not shown). One of the hits from this screen was the polarity factor *pkc-3*, which is  
258 essential for defining the anterior domain in the 1-cell embryo [34]. SLD-2 interacts  
259 with the PKC-3 region 94-184, which encompasses the pseudosubstrate (PS) and  
260 C1 domains (Fig 6A). To assess the function of this interaction *in vivo*, we set out to

261 identify a separation of function mutant in *sld-2*, which lacked the PKC-3 interaction.  
262 Using yeast two-hybrid analysis we narrowed down the interaction to the very C-  
263 terminus of SLD-2, region 232-249 (Fig 6B). This is a highly basic region of SLD-2  
264 (Fig S4A), which lacks any CDK sites. Indeed the SLD-2 mutant lacking all 8 CDK  
265 sites (either mutated to alanine or aspartic acid, 8A/8D) still interacted with PKC-3  
266 (Fig 6B). To identify a mutant that no longer interacted with PKC-3 we made  
267 scanning mutations in the region 232-249 (Fig S4B-C). A mutation that converted the  
268 very C-terminal 4 amino acids from KKKY to the acidic residues EDDD indeed  
269 resulted in loss of the interaction with PKC-3 (Fig 6B and S4B-C) and we hereafter  
270 refer to this mutant as *sld-2(EDDD)*. To check whether these mutations affect the  
271 essential functions of *sld-2*, we tested whether *sld-2(EDDD)* expression rescued the  
272 lethality of *sld-2* RNAi. Insertion of either *sld-2* wild type or the *EDDD* mutant at a  
273 MosSCI site fully rescued the lethality of *sld-2* RNAi (Fig 6C) strongly suggesting that  
274 the *sld-2(EDDD)* mutant is not defective in any of the essential functions of *sld-2*.

275 To investigate the significance of the SLD-2 interaction with PKC-3 for SLD-2  
276 localisation we generated *sld-2(WT)* and *sld-2(EDDD)* alleles by CRISPR.  
277 Homozygous *sld-2(EDDD)* strains were viable and showed no sterility phenotypes as  
278 expected from the MosSCI strains (Fig 6C and data not shown). Importantly while the  
279 wild type SLD-2 showed asymmetric localisation in the AB cell versus the P1 cell in  
280 2-cell embryos as expected, the *sld-2(EDDD)* mutant which can no longer interact  
281 with PKC-3 exhibited equal localisation in AB and P1 cells (Fig 6D and 6E). This  
282 suggested that the interaction of SLD-2 with PKC-3 is important for the asymmetric  
283 localisation of SLD-2 in the early *C. elegans* embryo. Although PKC-3 is largely  
284 cytoplasmic and SLD-2 is mostly nuclear, SLD-2 becomes entirely cytoplasmic upon  
285 nuclear envelope breakdown and we do observe an enrichment of both nuclear and  
286 cytoplasmic SLD-2, in the AB versus the P1 cell (Fig S4D).

287 Having identified a mutant of *sld-2* that is no longer asymmetrically localised in 2-cell

288 embryos, we wondered if this had an effect on the cell cycle duration of this stage.  
289 The *slid-2(EDDD)* mutant alone had no effect on the duration of the AB or P1 cycle  
290 length (Fig 6F). Previous studies have shown the importance of the inhibitory  
291 phosphorylation of CDK for elongating the P1 cell division cycle [6] and we also  
292 observed a significant reduction in P1 cell cycle length after RNAi of the CDK  
293 inhibitory kinase *wee-1* (Fig 6F). Combined inhibition of *wee-1* with the *slid-2(EDDD)*  
294 mutant did not further reduce the P1 or AB cell cycle lengths (Fig 6F). Together these  
295 data show that the PAR protein network controls SLD-2 asymmetry through PKC-3  
296 interaction, but on it's own symmetrical localisation of SLD-2 is not sufficient to  
297 advance the cell cycle at the 2-cell stage.

298

## 298 Discussion

299 It is vital for all organisms to make a perfect copy of the genome in every cell division.  
300 For eukaryotes this is achieved in large part by linking DNA replication control to  
301 CDK activation at the G1-S transition [7]. CDK plays a vital dual role in DNA  
302 replication, both as an inhibitor of the helicase loading step in the initiation reaction (a  
303 process called licensing) and as an activator of these loaded helicases during  
304 replisome assembly. In budding yeast, CDK activates replisome assembly by  
305 phosphorylation of Sld2 and Sld3, but the relative contribution of phosphorylation of  
306 these two proteins to replication initiation differs in other species [17]. CDK  
307 phosphorylation of the metazoan orthologue of Sld3 (Treslin/Ticrr/C15orf42) has  
308 been shown to be important for S-phase progression in human cells in culture  
309 [21,25,27], but evidence for an essential role for Sld2 (RecQ4/RecQL4)  
310 phosphorylation in vertebrate cells is lacking. Conversely, CDK phosphorylation of  
311 Sld3 is not essential in the fission yeast *S. pombe* and Sld3 orthologues are so far  
312 absent in *D. melanogaster* [17].

313 By characterising *sld-2* and *sld-3* in the nematode *C. elegans*, we show for the first  
314 time outside of budding yeast that both of these proteins mediate essential  
315 interactions with MUS-101 (Dpb11/Cut5/TopBP1) through critical CDK sites (Fig 1-2  
316 and [18]). Importantly phospho-mimicking mutants in both *sld-2* and *sld-3* that drive  
317 interactions with MUS-101 are partially sufficient for cyclin E/Cdk2 function in *C.*  
318 *elegans* (Fig 3). As the rescue of the *cye-1/cdk-2* RNAi with *sld-2(8D)/sld-3(8E)* is  
319 only partial we cannot rule out that there may be other CDK targets required for  
320 replication initiation in *C. elegans*, although it is also the case that the D and E  
321 mutants of *sld-2/sld-3* are not perfect phospho-mimics (Fig 2D). In addition, Cyclin  
322 E/Cdk2 has multiple functions in *C. elegans* such as contributing to embryo polarity  
323 [35] and cell cycle re-entry of differentiated cells [30,36]. While it is possible that  
324 some functions of cyclin E/Cdk2 may be compensated by other CDK complexes after

325 *cye-1/cdk-2* RNAi, it is important to note that, apart from a small number of blast  
326 cells, all cells differentiate and become post-mitotic before the completion of  
327 embryonic development in *C. elegans* [31]. Therefore our viability assays only assess  
328 the contribution of CyclinE/Cdk2 to cell proliferation during early embryogenesis.

329 A surprising feature of the *sld-2(8D)/sld-3(8E)* double mutant strain is that it is  
330 perfectly viable and fertile (Fig 2B and S2). Switch like activation of CDK at the G1-S  
331 transition is required to completely separate the period of replication licensing from  
332 initiation and bypass of phosphorylation of Sld2 and Sld3 results in genome instability  
333 and death in yeast [8,37]. Additional layers of regulation may contribute to viability in  
334 the *sld-2(8D)/sld-3(8E)* strain and one possibility is the activity of the Dbf4-dependent  
335 kinase DDK. Like CDK, DDK is important for replication initiation and Dbf4 is  
336 degraded by the APC/C in G1 phase in yeast, helping to prevent precocious  
337 replication initiation [7]. We have previously shown that APC/C-dependent control of  
338 Dbf4 is important in strains that mimic phosphorylation of Sld2/3 in yeast [8]. How the  
339 *sld-2(8D)/sld-3(8E)* strain maintains a separation of licensing from initiation in *C.*  
340 *elegans* remains to be determined.

341 The early embryonic divisions in many metazoa, such as in *Drosophila*, zebrafish and  
342 *Xenopus*, are extremely rapid, lack gap phases and are characterised by high rates  
343 of replication initiation. Cell cycle lengthening in these embryonic divisions coincides  
344 with activation of DNA damage checkpoint kinases and the down regulation of cyclin-  
345 dependent kinase (CDK) activity, through the inhibitory phosphorylation of CDK by  
346 Wee1 and down-regulation of the counteracting phosphatase Cdc25 (String/Twine in  
347 *Drosophila*) [38,39]. Inhibitory phosphorylation of CDK is likely critical for the  
348 introduction of G2 phase and for delaying entry into mitosis. In *Drosophila* however  
349 increasing CDK activity can also reduce S-phase length at the mid-blastula transition  
350 (MBT) [14], although expression of CDK mutants that cannot be inhibited by Wee1  
351 does not affect S-phase length at the MBT in *Xenopus* or zebrafish [15,16].

352 In *C. elegans*, CDC-25 and the Polo-like kinase PLK-1 (which increases the nuclear  
353 accumulation of CDC-25) preferentially localise to the faster dividing AB cell in the  
354 early embryo [2,4-6], while checkpoint activation has been proposed to preferentially  
355 occur in the P1 cell [40]. RNAi of *wee-1* in *C. elegans* indeed results in faster division  
356 of the P1 cell [6]. Therefore in both *Drosophila* and *C. elegans*, inhibitory  
357 phosphorylation of CDK plays an important role in cell cycle lengthening in the  
358 embryo. Despite this, in both of these organisms cell cycle elongation begins with  
359 changes in replication initiation [41,42], but how this is achieved is not clear. In  
360 *Drosophila* embryos, CDK activity prevents the chromatin binding of Rif1, and loss of  
361 Rif1 to a large extent prevents normal cell cycle elongation in cycle 14 [43]. Rif1 is  
362 known to inhibit replication initiation through counteraction of DDK, but also causes  
363 changes in chromatin structure [44]. Despite this, RNAi of Rif1 is not sufficient to  
364 accelerate the early embryonic divisions in *C. elegans* (MK and PZ data not shown).

365 Here we show that bypass of SLD-2 and SLD-3 activation by CDK is not sufficient to  
366 change the cell cycle length in the early embryo (Fig 4A). This suggests that CDK  
367 phosphorylation of these two replication substrates is not limiting for S-phase length  
368 at least at the two-cell stage. Instead we show that the SLD-2 and SLD-3 proteins  
369 themselves are asymmetrically distributed (Fig 4-6). It is striking that both the  
370 regulators and the substrates of CDK are asymmetrically localised in the AB versus  
371 P1 cell in *C. elegans* (Fig 6G and [2,4-6]). Although symmetric localisation of SLD-2  
372 alone was not sufficient for alter the early embryonic divisions (Fig 6F), we do not  
373 currently know how SLD-3 asymmetry is controlled to test the effect of equal  
374 distribution of both proteins towards cell cycle length.

375 SLD-2 asymmetry in the *C. elegans* embryo is controlled by direct interaction with the  
376 polarity factor PKC-3 (Fig 6), which is preferentially localised at the anterior of the  
377 embryo [32,45]. A simple mechanistic explanation for SLD-2 accumulation in the  
378 anterior AB nucleus over the posterior P1 nucleus is therefore that SLD-2 becomes



379 enriched in the AB cytoplasm (Fig S4D) by virtue of the established asymmetry of  
380 PKC-3. In line with this hypothesis, the localisation of both SLD-2 and the anterior  
381 polarity proteins, including PKC-3 are dependent on *par-3* and *par-4* (Fig 4 and  
382 [46,47]). Although cell polarity has been shown to be required for S-phase length  
383 control in the early *C. elegans* embryo [41], to our knowledge we have provided the  
384 first direct link between the polarity network proteins and factors that are essential for  
385 DNA replication initiation. This study may provide a platform to understand the  
386 mechanism by which programmed developmental cues directly influence S-phase  
387 length. As the human *pkc-3* orthologues are frequently mutated in cancers [48], this  
388 new link between atypical PKC and factors required for genome duplication may  
389 provide a novel mechanism by which this tumour suppressor affects cell proliferation.

390

391 **Figure legends**

392 **Fig 1. ZK484.4 is *C. elegans* *sld-3***

393 **A.** Scale diagram of Sld3, Treslin and ZK484.4 from budding yeast, humans and *C.*  
394 *elegans* respectively. The Cdc45 interaction (Sld3/Treslin) domain is in orange. The  
395 essential CDK sites in Sld3/Treslin and their potential orthologues in *C. elegans* are  
396 numbered. The regions of interaction between *C. elegans* ZK484.4 and CDC-  
397 45/MUS-101 are indicated below, together with a scale diagram of MUS-101 showing  
398 the 6 BRCT repeats as grey boxes.

399 **B.** Yeast two-hybrid analysis between MUS-101 and CDC-45 bait constructs and  
400 SLD-3 prey on non-selective (-Leu-Trp) and selective medium (-Leu-Trp-His+3-AT).

401 **C.** Box and whisker plot of embryonic lethality with and without *sld-3* RNAi by  
402 injection.

403 **D.** As C except RNAi was performed by feeding at 21°C.

404

405 **Fig 2. Two CDK sites in SLD-3 are essential for the interaction with MUS-101**

406 **A.** Alignment of the CDK sites in Sld3/Treslin required for the interactions with  
407 Dpb11/TopBP1. The amino acid numbers of the two orthologous CDK sites in *C.*  
408 *elegans* SLD-3 are indicated below.

409 **B.** Yeast two-hybrid analysis between MUS-101 (1-448) and SLD-3 (389-557) wild  
410 type (WT) or with the two CDK sites threonine 438 and 487 mutated to alanine (2A),  
411 aspartic acid (2D) or glutamic acid (2E).

412 **C and D.** Box and whisker plot of embryonic lethality after *sld-3* RNAi by injection as

413 in Fig 1C. The extra, RNAi insensitive copies of *sld-3* are inserted at a MosSCI site  
414 and expressed from the *mex-5* promoter.

415 **E.** Ratio of progeny from heterozygous *+sld-3(2D)* (top) or *+sld-3(2E)* (bottom)  
416 parents. These 2D/2E mutations were generated by CRISPR at the endogenous *sld-*  
417 *3* locus.

418

419 **Fig 3. Bypass of CDK site phosphorylation in SLD-3 and SLD-2 is partially**  
420 **sufficient for cyclinE/CDK-2 function**

421 **A.** CDK drives the interactions between SLD-2, SLD-3 and MUS-101 (top). The  
422 requirement for CDK can be bypassed using phospho-mimicking mutants in the  
423 essential CDK sites of SLD-2 (8D) or SLD-3 (2D or 2E).

424 **B.** Box plot of progeny size for the indicated strains containing *sld-2* and/or *sld-3*  
425 mutants as extra copies as MosSCI insertions.

426 **C** and **D.** Box plot of embryo lethality as in Fig 1C after *cye-1* (C) or *cdk-2* (D) RNAi  
427 by feeding in the indicated strains. \*\*\* P-value <0.005, \*\*0.006, \*0.0453.

428

429 **Fig 4. SLD-3 and SLD-2 are asymmetrically localised in the early embryo**

430 **A.** Cell cycle length in the AB and P1 cell of the two-cell embryo in the indicated  
431 strains. Error bars are SD.

432 **B.** Images of two-cell embryos of wild type (N2) or containing *mex-5p::sld-3-*  
433 *mCherry::tbb-2 3-UTR* construct integrated at a MosSCI site. mCherry was visualised  
434 by IF, DNA was stained with Hoechst. Scale bar is 10µm

435 **C.** As B. Images of two-cell embryo containing *mex-5p::sld-2-gfp::tbb-2 3UTR*

436 integrated at a MosSCI site. GFP signal was detected with Confocal Laser Scanning  
437 Microscopy. Lower Image shows DIC channel. Scale bar is 10  $\mu\text{m}$ . (Right) Graph  
438 indicates the ratio of GFP signal intensity from the P1 cell over the signal from the AB  
439 cell. Error bars are 95% CI.

440 **D.** As C, except endogenous SLD-2 was detected by immunofluorescence.

441 **E and F.** Quantitation of SLD-3-mCherry signal by IF (E) and SLD-2-GFP signal by  
442 fluorescence imaging (F) in the four-cell embryo. The signal in the ABa cell was set  
443 to 1.  $n=7$  for each measurement for E and  $n=5$  for F. Below the p-values were  
444 obtained by paired t-tests, ns is not significant.

445

#### 446 **Fig 5. SLD-2 asymmetry is polarity-dependent**

447 **A.** Images of two-cell embryos from the indicated strains after SLD-2 IF. Scale bar is  
448 10  $\mu\text{m}$ . N2, *par-3(it71)* and *pkc-3 RNAi* animals were grown at 20°C. The  
449 temperature-sensitive strain *pkc-3(ne4246)* was grown at 25°C

450 **B.** Box plot of the data from A. p-values were obtained using the Wilcoxon rank sum  
451 test.

452 **C.** Images of two-cell embryo of wild type (N2) and the temperature-sensitive  
453 *par-4(it57)* mutant containing *mex-5p::sld-2-gfp::tbb-2 3UTR* grown at 25°C. The  
454 fluorescent GFP signal was detected with Laser Confocal Scanning Microscopy.  
455 Scale bar is 10  $\mu\text{m}$ .

456 **D.** Box plot of the data from C. p-values were obtained using the Wilcoxon rank sum  
457 test.

458

#### 459 **Fig 6. SLD-2 asymmetry is PKC-3 interaction-dependent**

460 **A.** (Top) Scale diagram of *C. elegans* PKC-3. (Bottom) Diagram of PKC-3 fragments  
461 that were tested for yeast two-hybrid interaction with full length SLD-2. +/- represents  
462 whether the interaction was positive or negative.

463 **B.** Scale diagram of fragments of SLD-2 that were tested for yeast two-hybrid  
464 interaction with PKC-3 (1-219). +/- represents whether the interaction was positive or  
465 negative. SLD-2 8A or 8D refers to all 8 CDK sites mutated either alanine or aspartic  
466 acid. SLD-2 EDDD refers to residues 246-249 (KKKY) mutated to EDDD.

467 **C.** Embryonic lethality 16-40hrs post-injection from the wild type strain (N2) or  
468 MosSCI generated *mex-5p::sld-2(WT)::gfp::tbb-2 3UTR* or *mex-5p::sld-*  
469 *2(EDDD)::gfp::tbb-2 3UTR* strains. SLD-2 RNAi was done by injection. Error bars are  
470 95% CI.

471 **D.** Live imaging of PKC-3 GFP and SLD-2 mCherry or SLD-2 EDDD mCherry  
472 generated by CRISPR. Scale bar is 10  $\mu$ m.

473 **E.** Detection of the nuclear SLD-2 signal by IF. Box plot graph shows the ratio of the  
474 fluorescent signal intensity from the P1 cell over the signal from the AB cell from the  
475 wild type strain (N2) and the mutant *sld-2 EDDD* generated by CRISPR.

476 **F.** Box plot of the AB and P1 cell cycle length from the indicated strains with and  
477 without *wee1.3* RNAi by feeding. Cell cycle length was calculated as the time from  
478 the P0 cell nuclear envelope breakdown (NEB) to the AB or P1 NEB from 8s time-  
479 lapse movies. p-values were calculated using the Wilcoxon test.

480 **G.** Both CDK substrates (SLD-2 and SLD-3) and CDK activators (PLK-1, CDC-25  
481 and CYB-3) are asymmetrically localised at the 2-cell stage in *C. elegans*. The  
482 relative contribution of these localisations to asynchronous embryonic cell cycle  
483 lengths remains to be determined.

484

## 484 **Materials and Methods:**

485

### 486 **Strains:**

487 Standard conditions were used to maintain *C. elegans* cultures (Brenner, 1974). The  
 488 *C. elegans* Bristol strain N2 was used as wild type strain. Strains created by MosSCI  
 489 contain wobbled versions of *sld-2* or *sld-3*. The following strains were used in this  
 490 study: JA1564 (*weSi35 [Pmex-5::sld-2(wt)::egfp/tbb-2 3'UTR; cb-unc-119(+)] II; cb-*  
 491 *unc-119 (ed9) III*), JA1563(*weSi34 [Pmex-5::sld-2(8D)::egfp/tbb-2 3'UTR; cb-unc-*  
 492 *119(+)] II; cb-unc-119(ed9) III*) [18], KK300 (*par-4(it57ts)V*) [33], KK571 (*lon-1(e185)*  
 493 *par-3(it71)/qC1 [dpy-19(e1259) glp-1(q339)] III*) [49], KK1228 (*pkc-3(it309 [gfp::pkc-*  
 494 *3]) II*), WM150 (*pkc-3(ne4246)II*) [32] and EU548 (*div-1(or148ts) III*) [24].

495 Strains introduced in this study.

| name               | PAZ and zap name                                                                                      |
|--------------------|-------------------------------------------------------------------------------------------------------|
| <i>sld-3 WT</i>    | PAZ1 ( <i>zapSi1 (unc-119(ed9) III; [Pmex-5::sld-3(wt):: mcherry/tbb-2 3'UTR; cb-unc-119(+)] IV</i> ) |
| <i>sld-3 2A</i>    | PAZ2 ( <i>zapSi2 (unc-119(ed9) III; [Pmex-5::sld-3(2A):: mcherry/tbb-2 3'UTR; cb-unc-119(+)] IV</i> ) |
| <i>sld-3 2D</i>    | PAZ3 ( <i>zapSi3 (unc-119(ed9) III; [Pmex-5::sld-3(2D):: mcherry/tbb-2 3'UTR; cb-unc-119(+)] IV</i> ) |
| <i>sld-3 2E</i>    | PAZ4 ( <i>zapSi4 (unc-119(ed9) III; [Pmex-5::sld-3(2E):: mcherry/tbb-2 3'UTR; cb-unc-119(+)] IV</i> ) |
| <i>sld-3 T487A</i> | PAZ5 ( <i>sld-3 (zap5[sld-3 (T487A)])</i> )                                                           |
| <i>sld-3 T487D</i> | PAZ6 ( <i>sld-3 (zap6[sld-3 (T487D)])</i> )                                                           |
| <i>sld-3 T487E</i> | PAZ7 ( <i>sld-3 (zap7[sld-3 (T487E)])</i> )                                                           |
| <i>sld-3 T438A</i> | PAZ8 ( <i>sld-3 (zap8[sld-3 (T438A)])</i> )                                                           |
| <i>sld-3 T438D</i> | PAZ9 ( <i>sld-3 (zap9[sld-3 (T438D)])</i> )                                                           |
| <i>sld-3 T438E</i> | PAZ10 ( <i>sld-3 (zap10[sld-3 (T438E)])</i> )                                                         |

|                                  |                                                                                                                   |
|----------------------------------|-------------------------------------------------------------------------------------------------------------------|
| <i>+sld-3 2E</i>                 | PAZ11 ( <i>tmC18 [dpy-5(tmIs1200)] I; +/- sld-3(zap11[sld-3(2E)])</i> )                                           |
| <i>+sld-3 2D</i>                 | PAZ12 ( <i>tmC18 [dpy-5(tmIs1200)] I; +/- sld-3 (zap12[sld-3 (2D)])</i> )                                         |
| <i>sld-2 EDDD</i>                | PAZ13 ( <i>sld-2(zap13[sld-2<sup>(EDDD)</sup>])</i> )                                                             |
| <i>sld-2 EDDD-GFP</i>            | PAZ14 ( <i>zapSi14 (unc-119(ed9)) III; [Pmex-5::sld-2<sup>(EDDD)</sup>:: gfp/tbb-2 3'UTR; cb-unc-119(+)] IV</i> ) |
| <i>sld-2 EDDD 3xFLAG mCHERRY</i> | PAZ15 ( <i>sld-2(zap15[sld-2(EDDD)::3xFLAG::mcherry])</i> )                                                       |
| <i>sld-2 wt 3xFLAG mCHERRY</i>   | PAZ16 ( <i>sld-2 (zap16[sld-2(+)::3xFLAG::mcherry])</i> )                                                         |
| <i>sld-2 8D; sld-3 2E</i>        | PAZ17 ( <i>weSi34; zapSi4</i> )                                                                                   |
| <i>sld-2 8D; sld-3 2D</i>        | PAZ18 ( <i>weSi34; zapSi3</i> )                                                                                   |
| <i>sld-2 8D; sld-3 2E</i>        | PAZ19 ( <i>weSi34; +/-zap11</i> )                                                                                 |
| <i>sld-2 wt; sld-3 wt</i>        | PAZ20 ( <i>weSi35; zapSi1</i> )                                                                                   |
| <i>sld-2 wt; sld-3 2D</i>        | PAZ21 ( <i>weSi35; zapSi3</i> )                                                                                   |
| <i>sld-2 8D; sld-3 wt</i>        | PAZ22 ( <i>weSi34; zapSi1</i> )                                                                                   |

496

497 **Yeast-Two-Hybrid assays:**

498 Performed as previously described [18].

499 **Immunostaining:**

500 SLD-2 Immunofluorescence: Young adults were cut on a slide in a drop of M9 to  
501 release the young embryos. Embryos were freeze cracked and fixation with  
502 additional antibody incubation and washing steps were performed as described in  
503 [18]. The primary antibody was rabbit anti-SLD-2 (Ab 5058; [18]). SLD-2 antibody  
504 was used in a dilution of 1:100. Secondary antibody labelled with AlexaFluor488 anti-  
505 rabbit were obtained from Molecular Probes and used in a dilution of 1:500. Hoechst

506 stain was added 1:1000 into the secondary antibody dilution. Vectashield®  
507 Antifading Mounting Media was used for mounting. The temperature-sensitive mutant  
508 *pkc-3(ne4246)* was kept at 25°C overnight before the immunofluorescence  
509 experiment.

510 SLD-3 mCHERRY Immunofluorescence: Immunofluorescence was performed using  
511 a protocol adapted from [18]. Young adult hermaphrodites were cut to release  
512 embryos onto 0.1% poly-lysine (Sigma, P8920)-coated slides. Slides were covered  
513 with a 22x50mm coverslip and frozen on dry ice for 20 minutes. The coverslip was  
514 quickly removed while the slide where still frozen to permeabilise the embryos.  
515 Embryos were fixed in ice cold methanol for 30 seconds. Slides were additionally  
516 fixed in a fixing solution containing 4% Paraformaldehyde, 80mM Hepes, 1.6mM  
517 MgSO<sub>4</sub> and 0.8mM EGTA in PBS for 20 minutes at room temperature (RT). Samples  
518 were then washed in PBS and 0.2% Tween 20 (PBST) five times over 30 minutes,  
519 followed by blocking in 1% BSA in PBST (PBSTB) for one hour at RT. Slides were  
520 incubated in the primary antibody rabbit anti-RFP (600-401-379; Rockland antibodies  
521 and assays) (1:200) PBSTB solution overnight at 4°C. Slides were washed in PBST  
522 five times over 30 minutes, followed by incubation with the secondary antibody Alexa  
523 Fluor 594-conjugated donkey anti-rabbit antibody (A-21207; Molecular Probes)  
524 (1:500) and Hoechst 33342 stain (1:1000 final concentration 1 µg/mL) in PBSTB at  
525 RT for one hour. Samples were washed in PBST five times over 30 minutes and PBS  
526 five times over 20 minutes. Vectashield® Antifading Mounting Media was used for  
527 mounting.

#### 528 **RNAi by feeding:**

529 The temperature-sensitive mutant strain EU548 (*div-1(or148)*) was synchronized by  
530 bleaching and grown at 15°C together with N2 wild type control. RNAi inducing plates  
531 were spotted with *sl-d-3* RNAi (this study, ZK484.4 ORF was cloned into L4440



532 plasmid) bacteria grown at 37°C for 7hrs. RNAi bacteria grown at 37°C for 7hrs. L1  
533 worms were seeded on RNAi inducing plates and kept at 21°C until adulthood.  
534 Young adults were singled on separate NGM plates and the embryonic lethality of  
535 their progeny was determined.

536 For the embryonic lethality of *cdk-2*, *cyb-1* and *cye-1* RNAi bacteria were grown at  
537 37°C for 7hrs in LB containing Ampicillin. Worm strains were synchronized by  
538 bleaching. L4 worms were seeded on RNAi inducing plates with the respective RNAi  
539 bacteria until they reached adulthood and were allowed to lay eggs for 24hrs. Plates  
540 were kept at 25°C. The percentage of embryonic lethality of the F1 generation was  
541 calculated by counting the number of hatched and unhatched progeny.

542 The wildtype strain N2 was used for *pkc-3* RNAi. Worms were synchronized by  
543 bleaching. Plates were kept at 20°C. Mid L3 animals were seeded on RNAi inducing  
544 plates. Young adults were used for SLD-2 immunofluorescence staining. A subset of  
545 worms was singled to confirm PKC-3 knockdown by assessing embryonic lethality  
546 (data not shown).

547 *wee1.3* RNAi by feeding was performed with the wildtype strain N2 and the Crispr  
548 mutant *sld-2(zap13[sld-2(EDDD)])*. Worm strains were synchronized by bleaching.  
549 Bacteria were grown at 37°C for 7hrs in LB containing Ampicillin. A dilution of 10%  
550 (v/v) *wee-1.3* bacteria in L4440 control bacteria was used for seeding RNAi plates.  
551 Because *wee-1.3* bacteria induced sterility, young adults were used for RNAi  
552 induction overnight in 20°C. The next day the cell division timing was assessed by  
553 time-lapse movies. A subset of worms was transferred to new plates to confirm *wee-*  
554 *1.3* knockdown through embryonic lethality (data not shown).

555 *cyb-3* RNAi bacteria were grown in 37°C for 7hrs in LB containing Ampicillin. 2.5%  
556 (v/v) *cyb-3* bacteria diluted in L4440 control bacteria was used for seeding RNAi  
557 inducing plates. Worms were synchronized by bleaching. Plates were kept at 20°C.

558 L3 larva were seeded on RNAi plates. Young adult worms were singled out and  
559 allowed to lay eggs for 24hrs. After additional 36hrs the embryonic lethality was  
560 determined by counting the hatched and the unhatched progeny.

561 All RNAi experiments included the feeding of L4440 bacteria as a control.

#### 562 **RNAi by injections:**

563 *sld-3* RNAi injections: N2, PAZ1, PAZ2, PAZ3 and PAZ4 young adult hermaphrodites  
564 were injected with *sld-3* double stranded RNA, containing the entire coding region of  
565 ZK484.4 with a concentration of 100ng/μl. Injected worms were kept at 20°C and  
566 singled to separate NGM plates to assess the embryonic lethality in the F1  
567 generation.

568 *sld-2* RNAi injections: N2, JA1564 and PAZ14 were synchronized by bleaching and  
569 grown at 20°C to the young adult stage. Young hermaphrodites were injected with  
570 *sld-2* double stranded RNA prepared from T12F5.1 with a concentration of 150ng/μl.  
571 Injected worms were incubated at 20°C. The injected worms were singled out after  
572 16hrs post-injection and transferred on new plates every 24hrs for 3 days. The plates  
573 were assessed for total egg production and lethality in the embryos.

#### 574 **Microscopy and image analysis:**

575 Immunofluorescence of SLD-3 mCHERRY was visualized on a DeltaVision  
576 Deconvolution microscope. Z-stack images were taken and deconvoluted using the  
577 associated software.

578 The fluorescent signal of the nuclei was analysed with ImageJ. Z-stack images were  
579 combined using the Z-stack tool for maximum projection. The signals of the AB and  
580 p1 nuclei were normalized against background and the signal ratio of P1/AB  
581 visualized using R.

582 The immunofluorescent signal of SLD-2 staining and in-vivo imaging of the SLD-2  
583 GFP signal in JA1563 and *weSi35; par-4(it57)* were visualized using Leica S8 Laser  
584 Confocal microscope. Z-stack images through the whole embryo were taken. Images  
585 were analysed with ImageJ. Using the maximum projection z-stack tool the  
586 fluorescent signal of the nuclei was measured and normalized for background signal.  
587 Relative Fluorescence analysis of SLD-3 and SLD-2 signal in the four-cell embryo:  
588 Z-stack images of SLD-3 and SLD-2 IF was analysed using ImageJ. The fluorescent  
589 intensity signal of the different nuclei was obtained using the maximum projection  
590 tool. The signal in Aba was set to 1. The signal was normalized for background using  
591 the signal of the AB cytoplasm.

#### 592 **SLD-2 GFP localization kinetics:**

593 Time lapse z-stack movies of 1 min intervals were taken from early embryos of  
594 JA1564 with a Deltavision microscope using a 60x oil objective. The embryonic  
595 development of the pronuclei meeting to the nuclear envelope breakdown of the AB  
596 cell was recorded. The fluorescent signal intensity in the AB cell and the P1 cell was  
597 analysed using automated image analysis script run in ImageJ. The newly developed  
598 programme recognises the AB and the P1 cells in the Nomarski channel. Within the  
599 cells it measures an expanded area in the fluorescent GFP channel. The nuclear  
600 signal is normalised to the background intensity for both cells in each image per  
601 timepoint. The signal intensity is shown as Z-intensity.

#### 602 **Cell cycle length analysis:**

603 Cell cycle length was analysed for N2 and *weSi34; zapSi4*. Cell cycle length analysis  
604 was also done for N2 and *sld-2(zap13[sld-2EDDD])* for *wee1.3* RNAi. Time lapse z-  
605 stack movies were taken starting from pronuclei migration until the four-cell stage of  
606 the early embryo development in *C. elegans*. The time lapse interval was 8s. Cell

607 cycle time of the AB cell was calculated as the time starting from pronuclei fusion  
608 until nuclear envelope breakdown of the AB cell. Movie was taken using a Deltavision  
609 microscope with Nomarski optics and a 60X oil objective. Cell cycle timing of the P1  
610 cell was calculated as the time from pronuclei fusion until the nuclear envelope  
611 breakdown of the P1 cell.

612

613

#### 614 **Progeny assays:**

615 N2, JA1563, PAZ3, *weSi34*; *zapSi3* and *weSi34*; *zapSi4* were synchronized by  
616 bleaching. Plates were kept at 25°C. L4 (P0) were singled on NGM plates seeded  
617 with OP50. After 24hrs P0 worm was transferred on new plate. This was done for five  
618 days until egg production stopped. The total production of fertilized eggs from each  
619 animal was calculated.

#### 620 CRISPR *sld-3(2D)* and *sld-3(2E)* progeny analysis:

621 Heterozygous hermaphrodites of *sld-3(2D)* and *sld-3(2E)* and homozygotes single  
622 site mutants were allowed to lay eggs at 20°C. Their larvae were singled on new  
623 plates and checked for sterility. After two days after reaching adulthood they were  
624 lysed and genotyped by PCR for the *sld-3* locus.

625

#### 626 **Embryonic lethality assays:**

627 The *sld-3* Crispr mutants (*sld-3(paz5)*, *sld-3(paz6)*, *sld-3(paz7)*, *sld-3(paz8)*, *sld-*  
628 *3(paz9)*, *sld-3(paz10)*) were tested for embryonic lethality. N2 was used as a control.  
629 Plates were kept at 20°C. Young adults were singled on new plates and allowed to

630 lay eggs for 24hrs. The hermaphrodite was then removed and the embryonic lethality  
631 was determined after additional 36 hours.

632 The *sld-2(8D); sld-3(2E)* MosSCI strain was tested for embryonic lethality. N2 and  
633 weSi34; zapSi4 were synchronized by bleaching. The plates were grown in 25°C  
634 until mid-J4 stage. Worms were singled on new plates and transferred again to new  
635 plates every 24hrs for five days until egg production stopped. Living larva and  
636 unhatched eggs were counted after additional 24hrs. Experiment was performed in  
637 25°C.

638

639

640

#### 641 **Acknowledgements**

642 Thanks to Julie Ahringer for strains WM150 and KK571 and discussions. We thank  
643 Nathan Goehring for the worm strain KK1228 and strains KK300 and EU548 were  
644 obtained from the CGC. Work in the PZ lab was supported by AICR 10-0908,  
645 Wellcome Trust 107056/Z/15/Z and Gurdon Institute funding (Cancer Research UK  
646 C6946/A14492, Wellcome Trust 092096). MK was supported by HFSP grant  
647 LT000681/2017-L. AK was supported by Wellcome Trust studentship 203767/Z/16/Z.

648

## 648 **References**

- 649 1. Nordman J, Orr-Weaver TL (2012) Regulation of DNA replication during  
650 development. *Development* 139: 455-464.
- 651 2. Tavernier N, Labbe JC, Pintard L (2015) Cell cycle timing regulation during  
652 asynchronous divisions of the early *C. elegans* embryo. *Exp Cell Res* 337:  
653 243-248.
- 654 3. Edgar LG, McGhee JD (1988) DNA synthesis and the control of embryonic gene  
655 expression in *C. elegans*. *Cell* 53: 589-599.
- 656 4. Rivers DM, Moreno S, Abraham M, Ahringer J (2008) PAR proteins direct  
657 asymmetry of the cell cycle regulators Polo-like kinase and Cdc25. *J Cell*  
658 *Biol* 180: 877-885.
- 659 5. Budirahardja Y, Gonczy P (2008) PLK-1 asymmetry contributes to asynchronous  
660 cell division of *C. elegans* embryos. *Development* 135: 1303-1313.
- 661 6. Michael WM (2016) Cyclin CYB-3 controls both S-phase and mitosis and is  
662 asymmetrically distributed in the early *C. elegans* embryo. *Development*  
663 143: 3119-3127.
- 664 7. Labib K (2010) How do Cdc7 and cyclin-dependent kinases trigger the initiation of  
665 chromosome replication in eukaryotic cells? *Genes Dev* 24: 1208-1219.
- 666 8. Zegerman P, Diffley JF (2007) Phosphorylation of Sld2 and Sld3 by cyclin-  
667 dependent kinases promotes DNA replication in budding yeast. *Nature* 445:  
668 281-285.
- 669 9. Tanaka S, Umemori T, Hirai K, Muramatsu S, Kamimura Y, et al. (2007) CDK-  
670 dependent phosphorylation of Sld2 and Sld3 initiates DNA replication in  
671 budding yeast. *Nature* 445: 328-332.
- 672 10. Bell SP, Labib K (2016) Chromosome Duplication in *Saccharomyces cerevisiae*.  
673 *Genetics* 203: 1027-1067.
- 674 11. Mantiero D, Mackenzie A, Donaldson A, Zegerman P (2011) Limiting replication  
675 initiation factors execute the temporal programme of origin firing in budding  
676 yeast. *EMBO J* 30: 4805-4814.
- 677 12. Tanaka S, Nakato R, Katou Y, Shirahige K, Araki H (2011) Origin association of  
678 Sld3, Sld7, and Cdc45 proteins is a key step for determination of origin-firing  
679 timing. *Curr Biol* 21: 2055-2063.
- 680 13. Collart C, Allen GE, Bradshaw CR, Smith JC, Zegerman P (2013) Titration of four  
681 replication factors is essential for the *Xenopus laevis* midblastula transition.  
682 *Science* 341: 893-896.

- 683 14. Farrell JA, Shermoen AW, Yuan K, O'Farrell PH (2012) Embryonic onset of late  
684 replication requires Cdc25 down-regulation. *Genes Dev* 26: 714-725.
- 685 15. Dalle Nogare DE, Pauerstein PT, Lane ME (2009) G2 acquisition by  
686 transcription-independent mechanism at the zebrafish midblastula transition.  
687 *Dev Biol* 326: 131-142.
- 688 16. Collart C, Smith JC, Zegerman P (2017) Chk1 Inhibition of the Replication Factor  
689 Drf1 Guarantees Cell-Cycle Elongation at the *Xenopus laevis* Mid-blastula  
690 Transition. *Dev Cell* 42: 82-96 e83.
- 691 17. Zegerman P (2015) Evolutionary conservation of the CDK targets in eukaryotic  
692 DNA replication initiation. *Chromosoma* 124: 309-321.
- 693 18. Gaggioli V, Zeiser E, Rivers D, Bradshaw CR, Ahringer J, et al. (2014) CDK  
694 phosphorylation of SLD-2 is required for replication initiation and germline  
695 development in *C. elegans*. *J Cell Biol* 204: 507-522.
- 696 19. Ito H, Muramatsu S, Shirakihara Y, Araki H (2014) Crystal structure of the  
697 homology domain of the eukaryotic DNA replication proteins Sld3/Treslin.  
698 *Structure* 22: 1341-1347.
- 699 20. Sanchez-Pulido L, Diffley JF, Ponting CP (2010) Homology explains the  
700 functional similarities of Treslin/Ticrr and Sld3. *Curr Biol* 20: R509-510.
- 701 21. Boos D, Sanchez-Pulido L, Rappas M, Pearl LH, Oliver AW, et al. (2011)  
702 Regulation of DNA replication through Sld3-Dpb11 interaction is conserved  
703 from yeast to humans. *Curr Biol* 21: 1152-1157.
- 704 22. Kumagai A, Shevchenko A, Shevchenko A, Dunphy WG (2010) Treslin  
705 collaborates with TopBP1 in triggering the initiation of DNA replication. *Cell*  
706 140: 349-359.
- 707 23. Kohler K, Sanchez-Pulido L, Hofer V, Marko A, Ponting CP, et al. (2019) The  
708 Cdk8/19-cyclin C transcription regulator functions in genome replication  
709 through metazoan Sld7. *PLoS Biol* 17: e2006767.
- 710 24. Encalada SE, Martin PR, Phillips JB, Lyczak R, Hamill DR, et al. (2000) DNA  
711 replication defects delay cell division and disrupt cell polarity in early  
712 *Caenorhabditis elegans* embryos. *Dev Biol* 228: 225-238.
- 713 25. Kumagai A, Shevchenko A, Shevchenko A, Dunphy WG (2011) Direct regulation  
714 of Treslin by cyclin-dependent kinase is essential for the onset of DNA  
715 replication. *J Cell Biol* 193: 995-1007.
- 716 26. Frokjaer-Jensen C, Davis MW, Hopkins CE, Newman BJ, Thummel JM, et al.  
717 (2008) Single-copy insertion of transgenes in *Caenorhabditis elegans*. *Nat*  
718 *Genet* 40: 1375-1383.

- 719 27. Sansam CG, Goins D, Siefert JC, Clowdus EA, Sansam CL (2015) Cyclin-  
720 dependent kinase regulates the length of S phase through TICRR/TRESLIN  
721 phosphorylation. *Genes Dev* 29: 555-566.
- 722 28. Jackson PK, Chevalier S, Philippe M, Kirschner MW (1995) Early events in DNA  
723 replication require cyclin E and are blocked by p21CIP1. *J Cell Biol* 130:  
724 755-769.
- 725 29. Knoblich JA, Sauer K, Jones L, Richardson H, Saint R, et al. (1994) Cyclin E  
726 controls S phase progression and its down-regulation during *Drosophila*  
727 embryogenesis is required for the arrest of cell proliferation. *Cell* 77: 107-  
728 120.
- 729 30. Fay DS, Han M (2000) Mutations in *cye-1*, a *Caenorhabditis elegans* cyclin E  
730 homolog, reveal coordination between cell-cycle control and vulval  
731 development. *Development* 127: 4049-4060.
- 732 31. Sulston JE, Schierenberg E, White JG, Thomson JN (1983) The embryonic cell  
733 lineage of the nematode *Caenorhabditis elegans*. *Dev Biol* 100: 64-119.
- 734 32. Rodriguez J, Peglion F, Martin J, Hubatsch L, Reich J, et al. (2017) aPKC Cycles  
735 between Functionally Distinct PAR Protein Assemblies to Drive Cell Polarity.  
736 *Dev Cell* 42: 400-415 e409.
- 737 33. Watts JL, Morton DG, Bestman J, Kemphues KJ (2000) The *C. elegans* *par-4*  
738 gene encodes a putative serine-threonine kinase required for establishing  
739 embryonic asymmetry. *Development* 127: 1467-1475.
- 740 34. Hoegge C, Hyman AA (2013) Principles of PAR polarity in *Caenorhabditis elegans*  
741 embryos. *Nat Rev Mol Cell Biol* 14: 315-322.
- 742 35. Cowan CR, Hyman AA (2006) Cyclin E-Cdk2 temporally regulates centrosome  
743 assembly and establishment of polarity in *Caenorhabditis elegans* embryos.  
744 *Nat Cell Biol* 8: 1441-1447.
- 745 36. Korzelius J, The I, Ruijtenberg S, Prinsen MB, Portegijs V, et al. (2011)  
746 *Caenorhabditis elegans* cyclin D/CDK4 and cyclin E/CDK2 induce distinct  
747 cell cycle re-entry programs in differentiated muscle cells. *PLoS Genet* 7:  
748 e1002362.
- 749 37. Tanaka S, Araki H (2011) Multiple regulatory mechanisms to inhibit untimely  
750 initiation of DNA replication are important for stable genome maintenance.  
751 *PLoS Genet* 7: e1002136.
- 752 38. Kermi C, Lo Furno E, Maiorano D (2017) Regulation of DNA Replication in Early  
753 Embryonic Cleavages. *Genes (Basel)* 8.



- 754 39. Farrell JA, O'Farrell PH (2014) From egg to gastrula: how the cell cycle is  
755 remodeled during the *Drosophila* mid-blastula transition. *Annu Rev Genet*  
756 48: 269-294.
- 757 40. Brauchle M, Baumer K, Gonczy P (2003) Differential activation of the DNA  
758 replication checkpoint contributes to asynchrony of cell division in *C.*  
759 *elegans* embryos. *Curr Biol* 13: 819-827.
- 760 41. Benkemoun L, Descoteaux C, Chartier NT, Pintard L, Labbe JC (2014) PAR-  
761 4/LKB1 regulates DNA replication during asynchronous division of the early  
762 *C. elegans* embryo. *J Cell Biol* 205: 447-455.
- 763 42. Shermoen AW, McClelland ML, O'Farrell PH (2010) Developmental control of late  
764 replication and S phase length. *Curr Biol* 20: 2067-2077.
- 765 43. Seller CA, O'Farrell PH (2018) Rif1 prolongs the embryonic S phase at the  
766 *Drosophila* mid-blastula transition. *PLoS Biol* 16: e2005687.
- 767 44. Boos D, Ferreira P (2019) Origin Firing Regulations to Control Genome  
768 Replication Timing. *Genes (Basel)* 10.
- 769 45. Cuenca AA, Schetter A, Aceto D, Kempthues K, Seydoux G (2003) Polarization of  
770 the *C. elegans* zygote proceeds via distinct establishment and maintenance  
771 phases. *Development* 130: 1255-1265.
- 772 46. Hung TJ, Kempthues KJ (1999) PAR-6 is a conserved PDZ domain-containing  
773 protein that colocalizes with PAR-3 in *Caenorhabditis elegans* embryos.  
774 *Development* 126: 127-135.
- 775 47. Tabuse Y, Izumi Y, Piano F, Kempthues KJ, Miwa J, et al. (1998) Atypical protein  
776 kinase C cooperates with PAR-3 to establish embryonic polarity in  
777 *Caenorhabditis elegans*. *Development* 125: 3607-3614.
- 778 48. Newton AC (2018) Protein kinase C as a tumor suppressor. *Semin Cancer Biol*  
779 48: 18-26.
- 780 49. Watts JL, Etemad-Moghadam B, Guo S, Boyd L, Draper BW, et al. (1996) par-6,  
781 a gene involved in the establishment of asymmetry in early *C. elegans*  
782 embryos, mediates the asymmetric localization of PAR-3. *Development* 122:  
783 3133-3140.

784

785

785 **Supplementary Fig Legends**

786 **Fig S1.** Analysis of single CDK site mutants in *sld-3*

787 **A.** Alignment of the CDK sites in Sld3/Treslin required for the interactions with  
788 Dpb11/TopBP1. The amino acid numbers of the two orthologous CDK sites in *C.*  
789 *elegans* SLD-3 are indicated below.

790 **B and C.** Box plots of progeny size (B) and embryonic lethality (C) of a wild type  
791 strain (N2) or strains with the CDK site T487 mutated to alanine, aspartic acid or  
792 glutamic acid by CRISPR.

793 **D and E.** As B/C except for the T438 CDK site.

794

795 **Fig S2.** Bypass of Sld3 and Sld2 phosphorylation is partially sufficient for cyclin E  
796 function.

797 **A.** Box plots of embryonic lethality from strains containing extra copies of *sld-2* / *sld-*  
798 *3*, both of which are inserted at a MosSCI sites and expressed from the *mex-5*  
799 promoter.

800 **B-E.** As A, but with RNAi of *cye-1* (B and C), *cyb-1* (D) or *cyb-3* (E).

801

802 **Fig S3.** SLD-3 and SLD-2 are asymmetrically localised in the early embryo

803 **A.** Box plot of SLD-3 mCherry signal ratio between the P1 and the AB cell.

804 **B.** Images from A. Images show brightfield, Hoescht and mCherry signal of the wild  
805 type (N2) or the respective MosSCI lines. mCherry signal corresponds to SLD-3  
806 expression in the two-cell embryo. Scale bar is 10µm.

807 **C.** Quantitation of SLD-2-GFP fluorescence from live imaging. Graph shows  
808 fluorescent intensity signal of the AB and P1 cell. The graph represents one-minute  
809 time-lapse movies of two cell embryos. The time point 0 is the nuclear envelope  
810 breakdown (NEB) in the AB cell. Error bars are 95% CI; n = 8

811

812 **Fig S4.** Generation of PKC-3 interaction mutant in SLD-2.

813 **A.** Alignment of the C-termini of SLD-2 proteins from the indicated nematode  
814 species. The region of interaction between *C. elegans* SLD-2 and PKC-3 is indicated  
815 in red.

816 **B.** Summary of the yeast two-hybrid interactions between SLD-2 mutants and PKC-3  
817 1-219.

818 **C.** Yeast two-hybrid growth assays of some of the mutants described in B.

819 **D.** Images of PKC-3 GFP and SLD-2 mCherry. This is the same image as Fig 6D, but  
820 with increased brightness of the mcherry signal to visualise SLD-2 in the cytoplasm.  
821 Scale bar is 10  $\mu$ m.

822

Figure 1

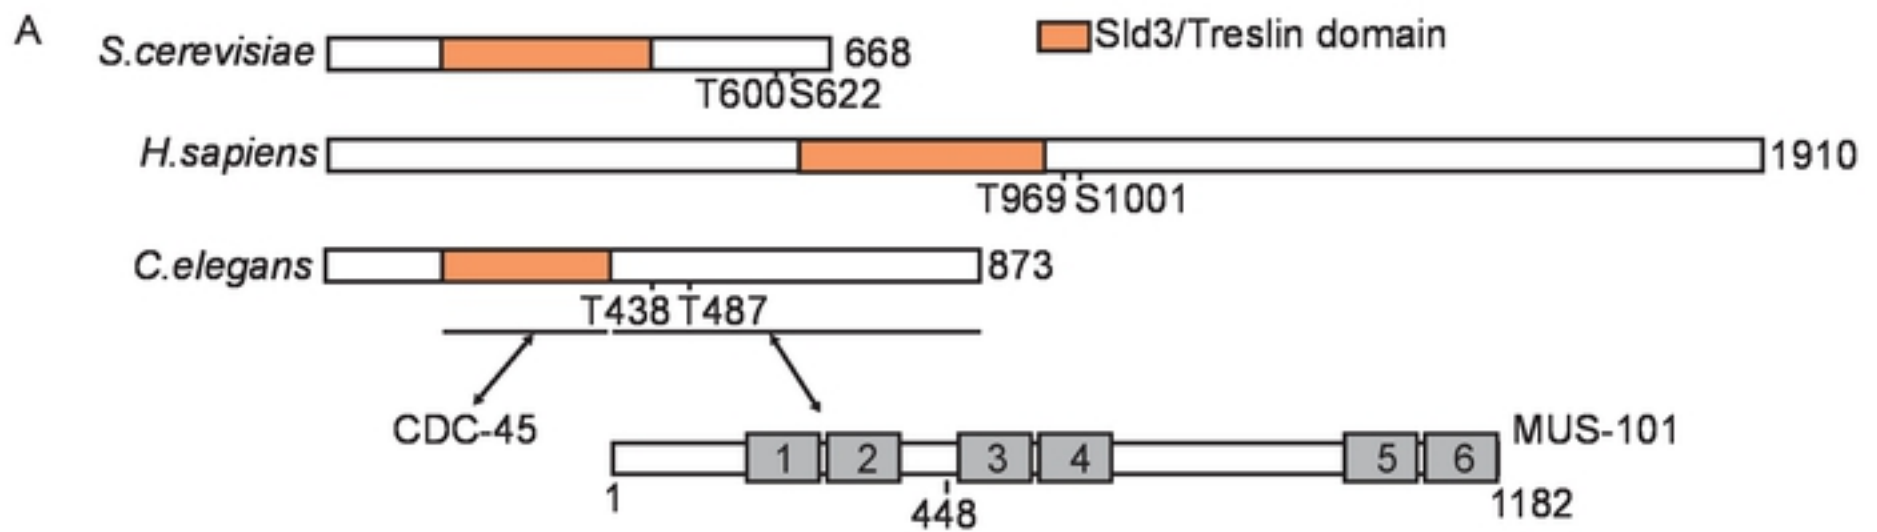

bioRxiv preprint doi: <https://doi.org/10.1101/2020.06.24.168708>; this version posted June 24, 2020. The copyright holder for this preprint (which was not certified by peer review) is the author/funder, who has granted bioRxiv a license to display the preprint in perpetuity. It is made available under aCC-BY 4.0 International license.

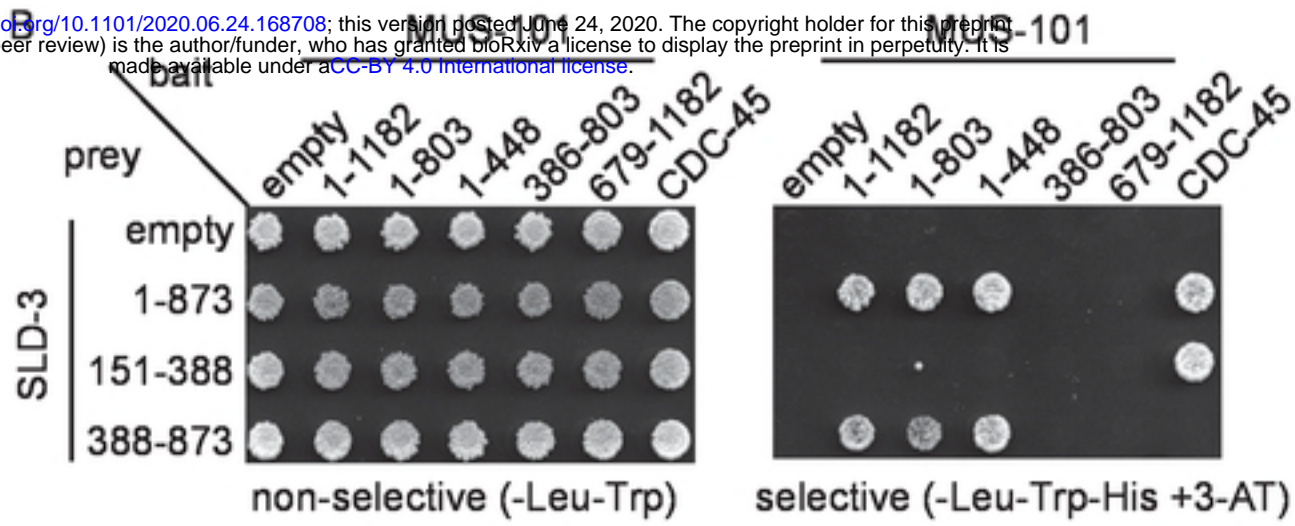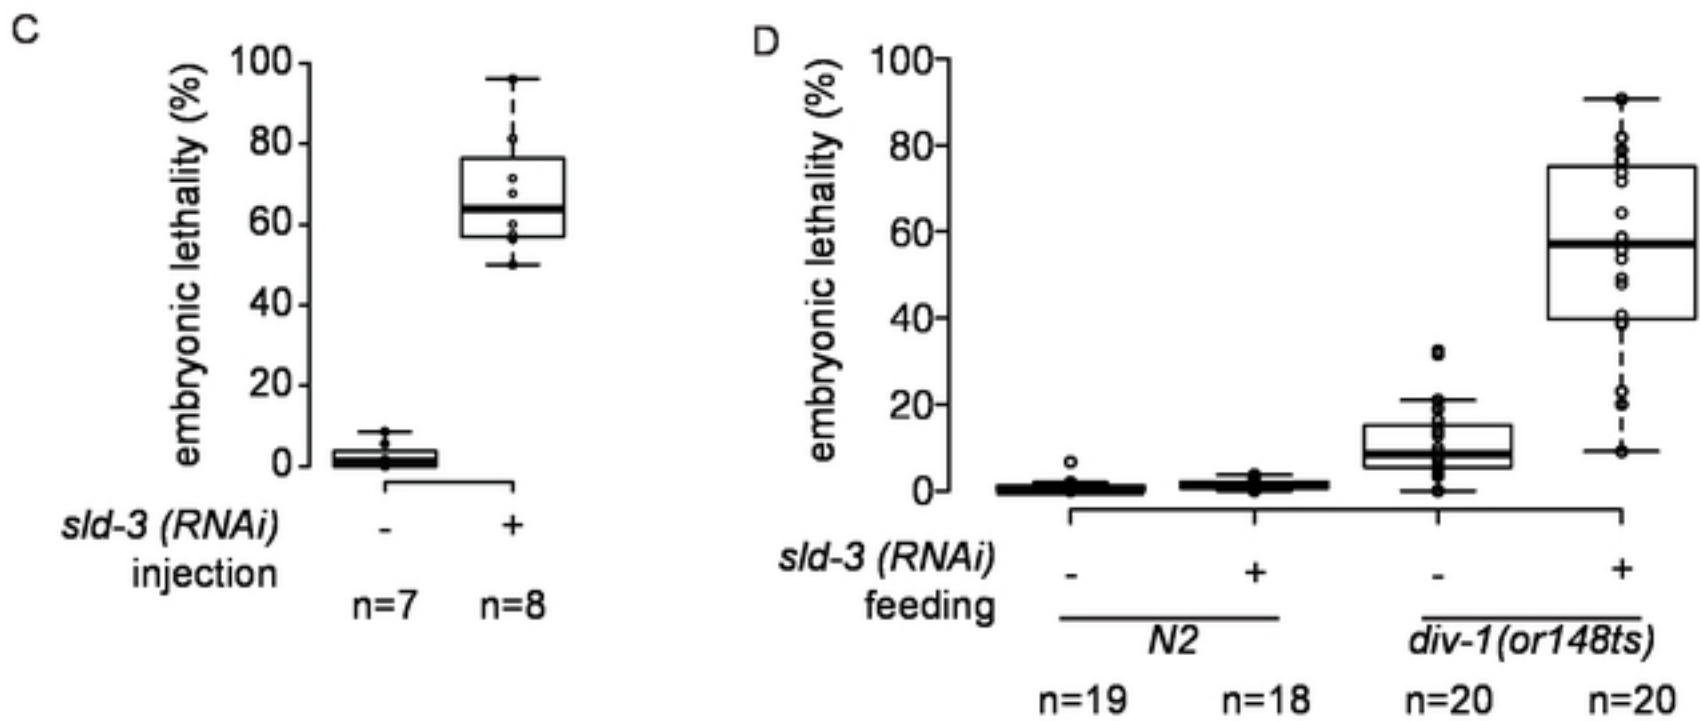

Figure 2

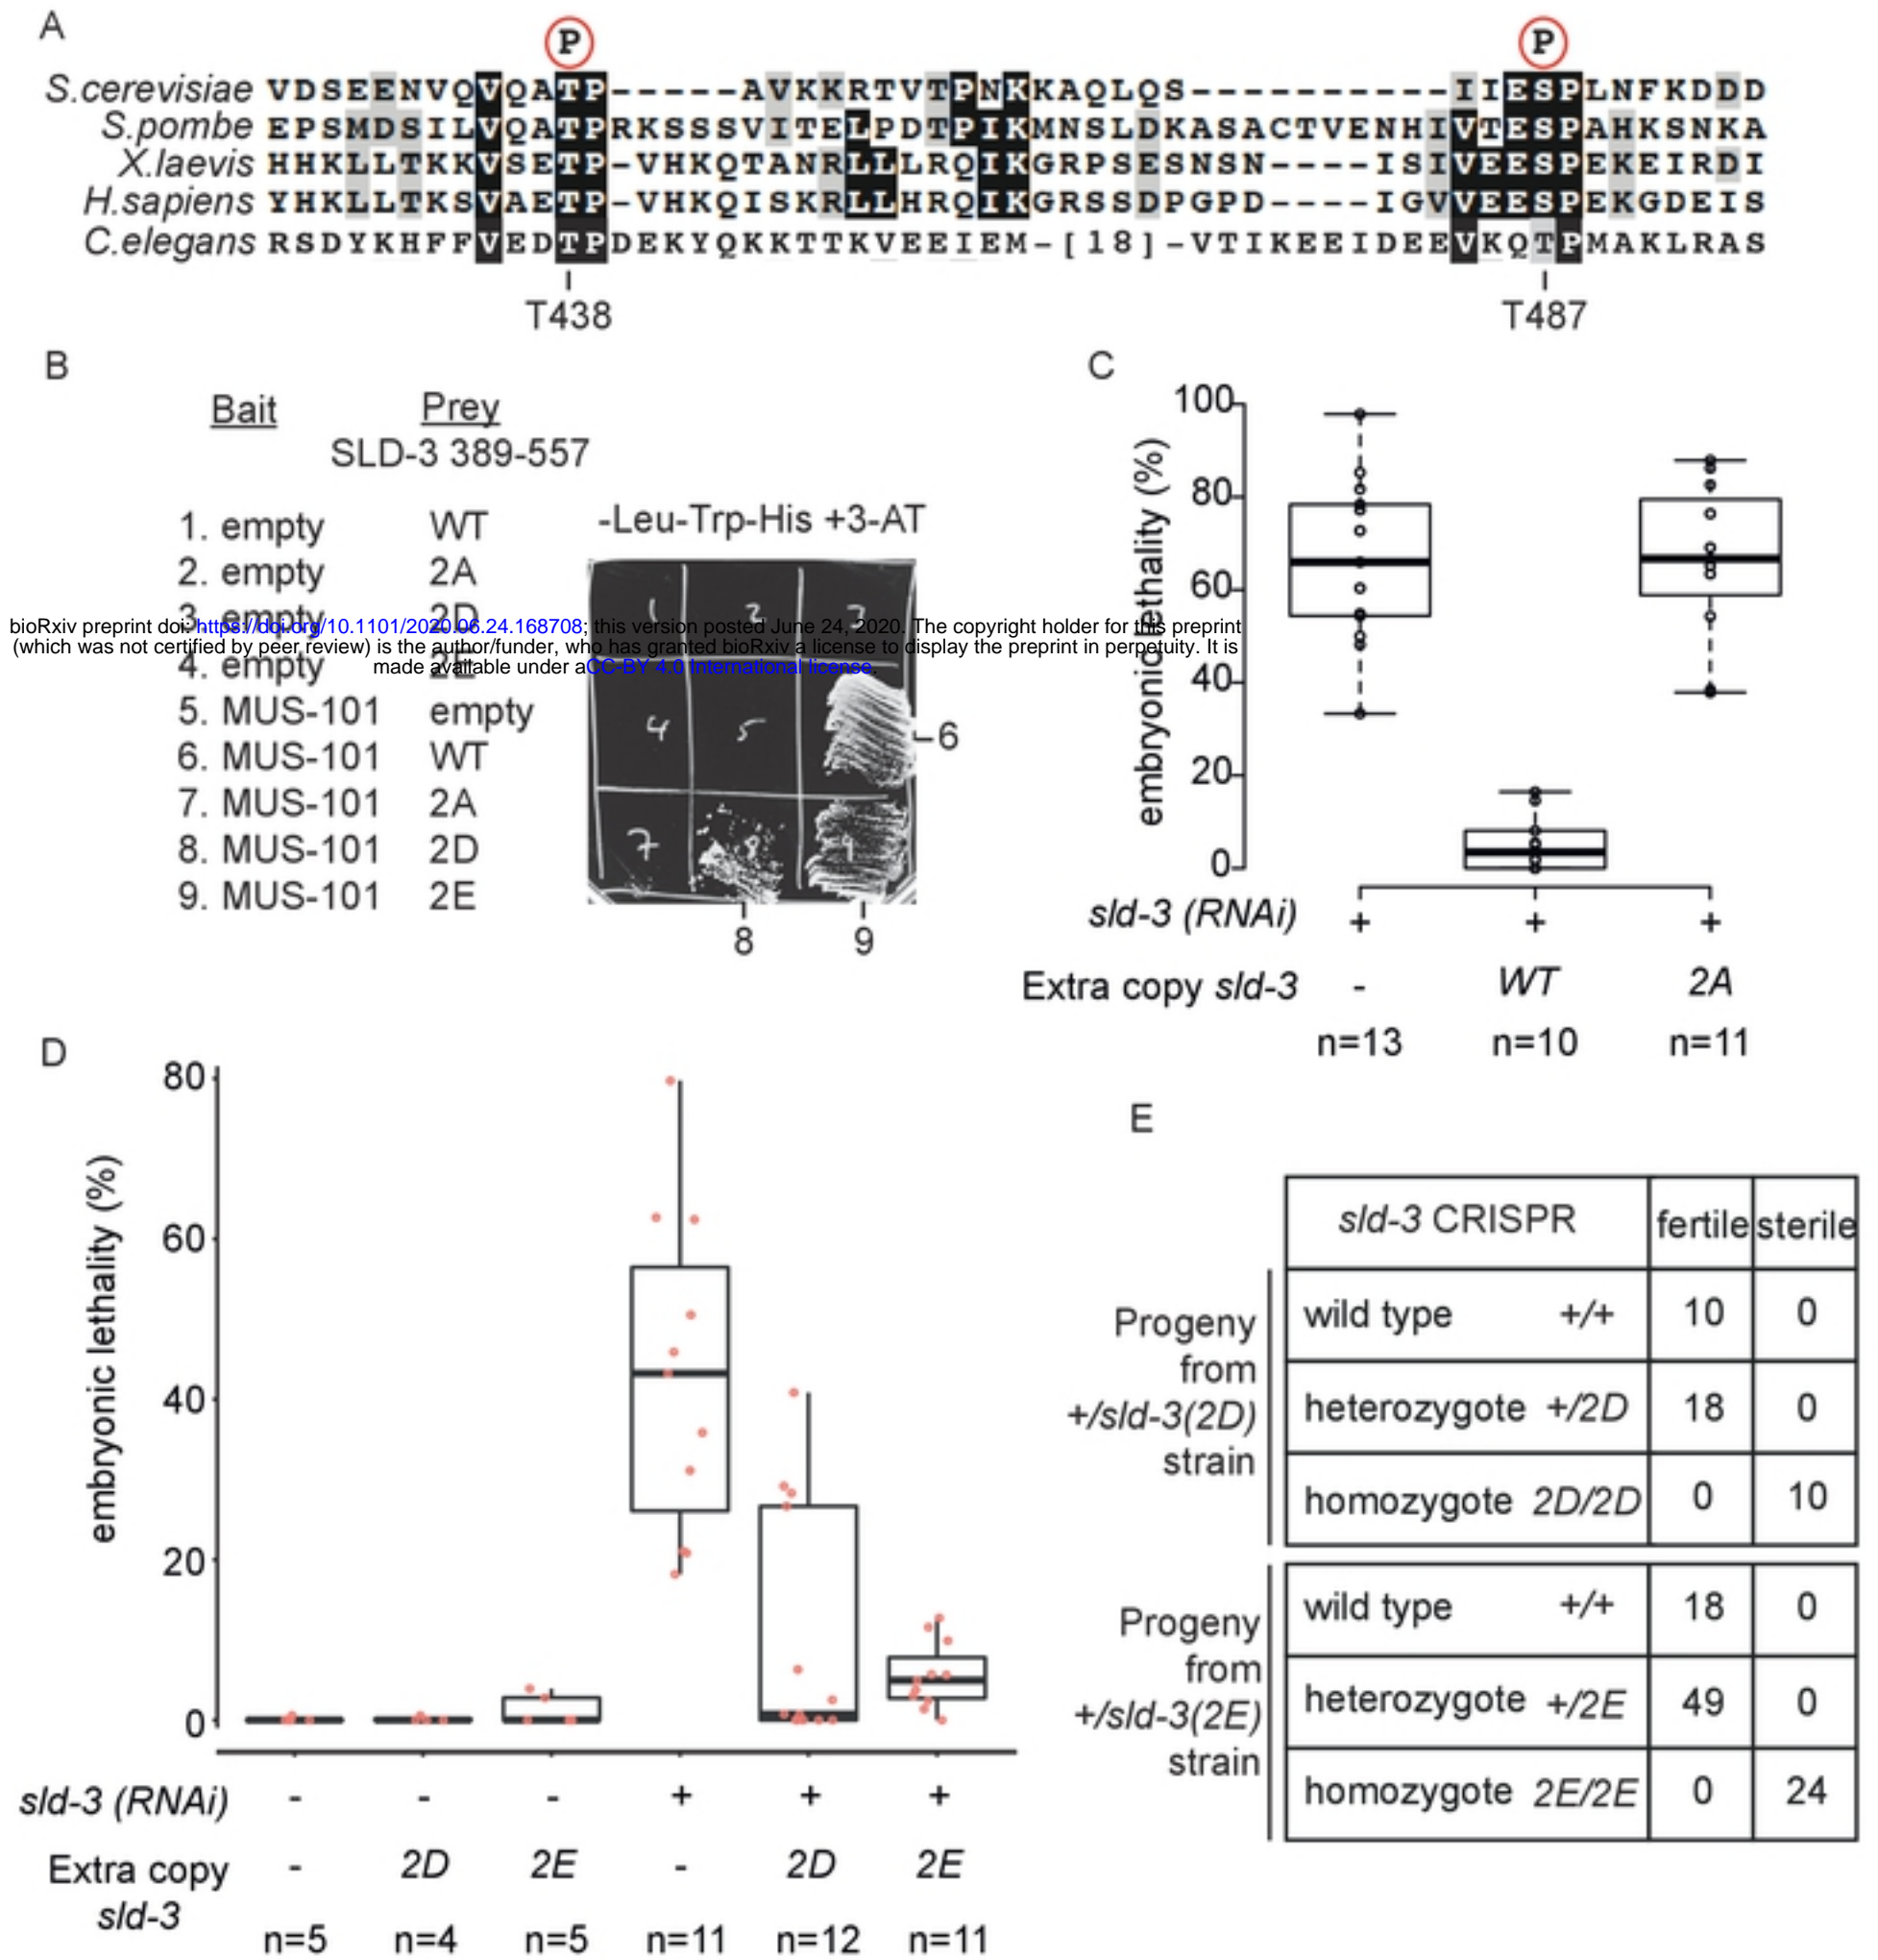

Figure 3

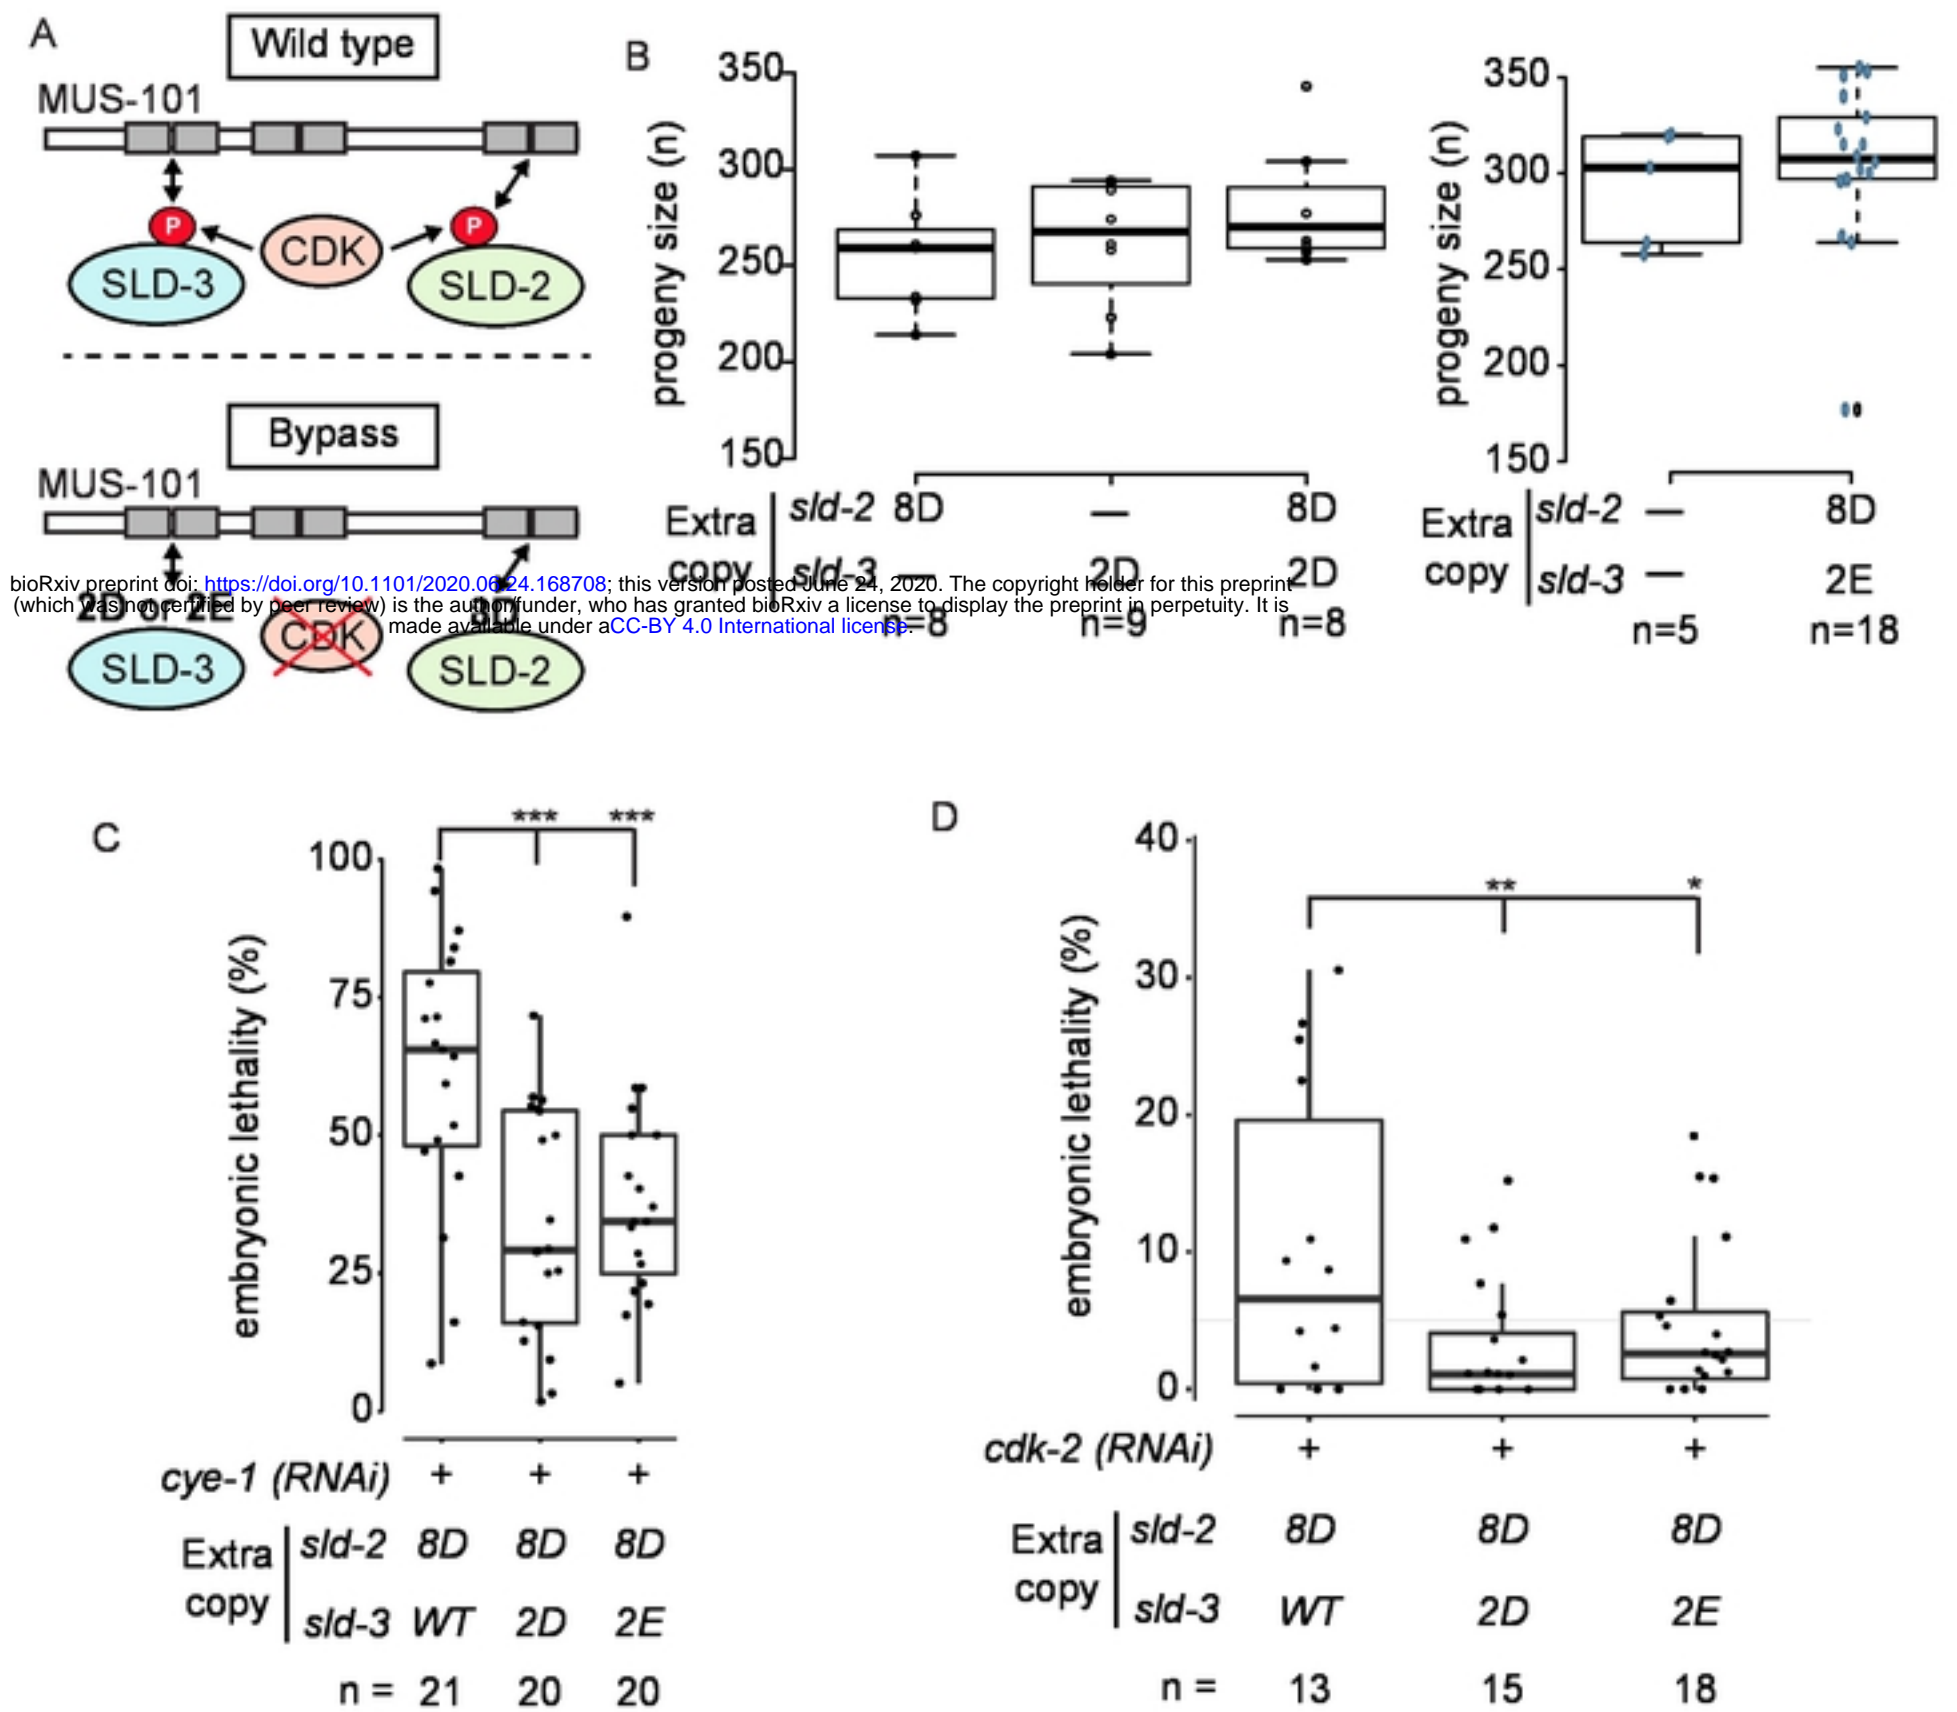

bioRxiv preprint doi: <https://doi.org/10.1101/2020.06.24.168708>; this version posted June 24, 2020. The copyright holder for this preprint (which was not certified by peer review) is the author/funder, who has granted bioRxiv a license to display the preprint in perpetuity. It is made available under aCC-BY 4.0 International license.

Figure 4

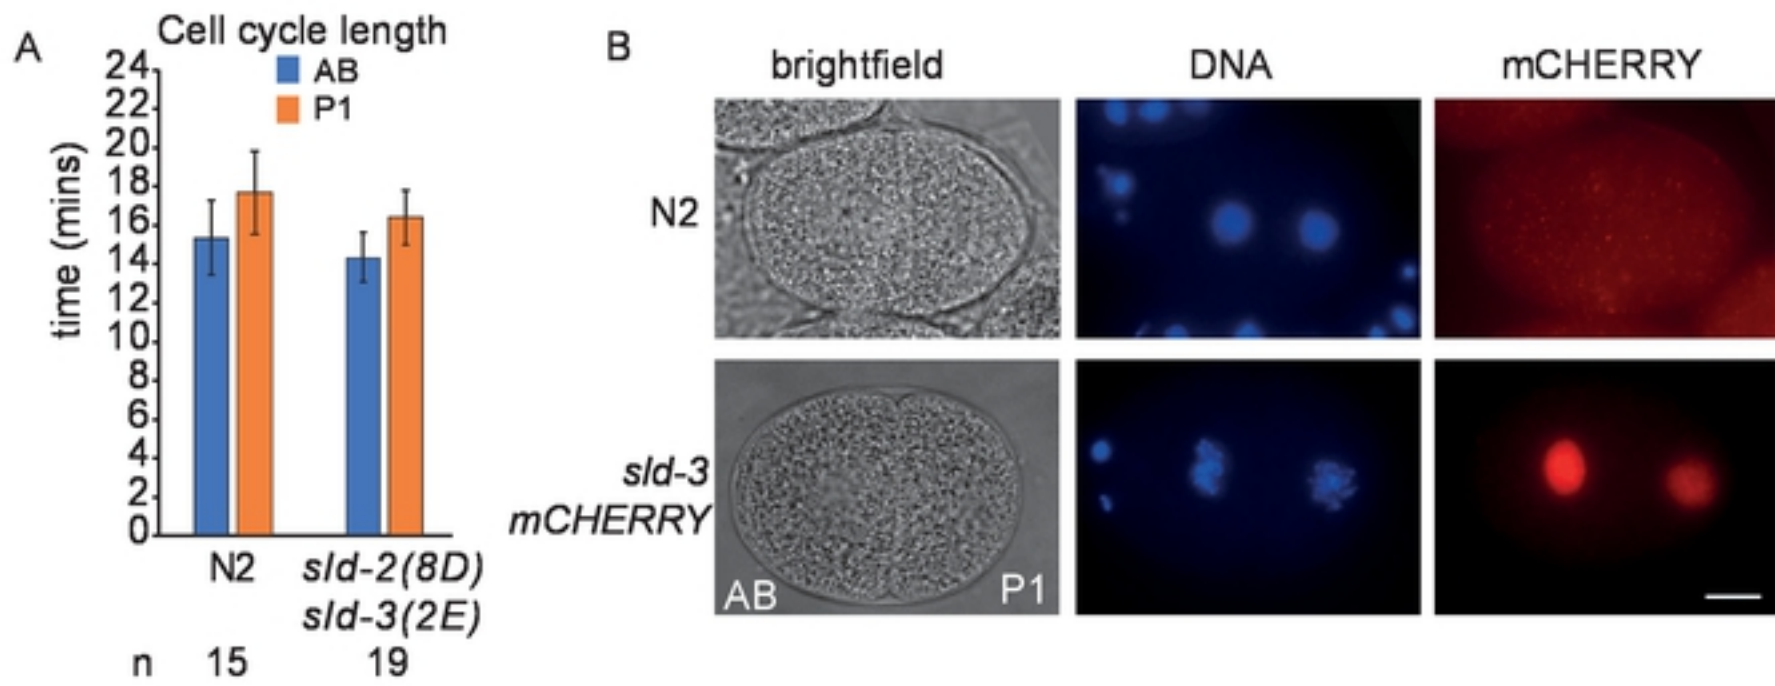

bioRxiv preprint doi: <https://doi.org/10.1101/2020.06.24.168708>; this version posted June 24, 2020. The copyright holder for this preprint (which was not certified by peer review) is the author/funder, who has granted bioRxiv a license to display the preprint in perpetuity. It is made available under aCC-BY 4.0 International license.

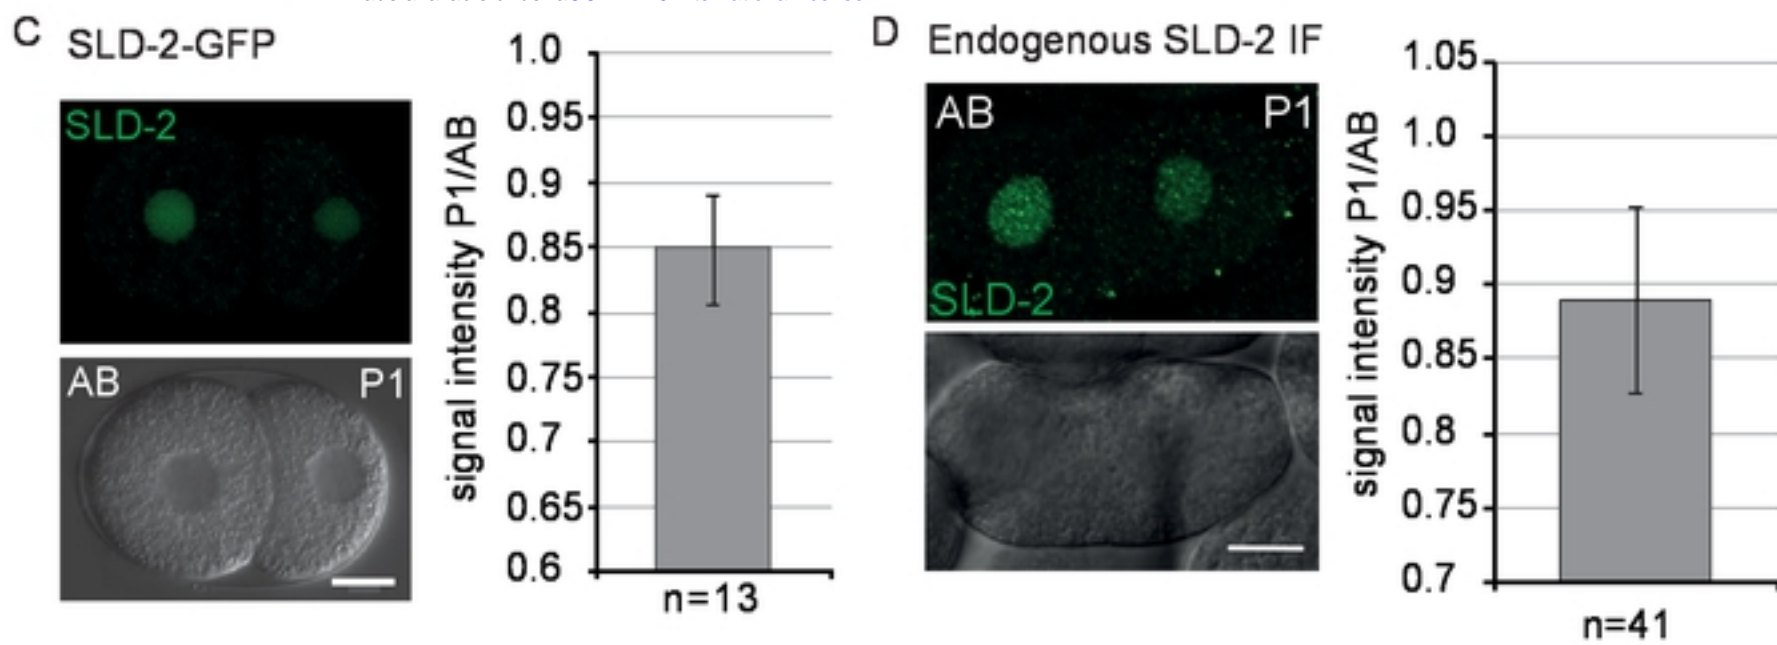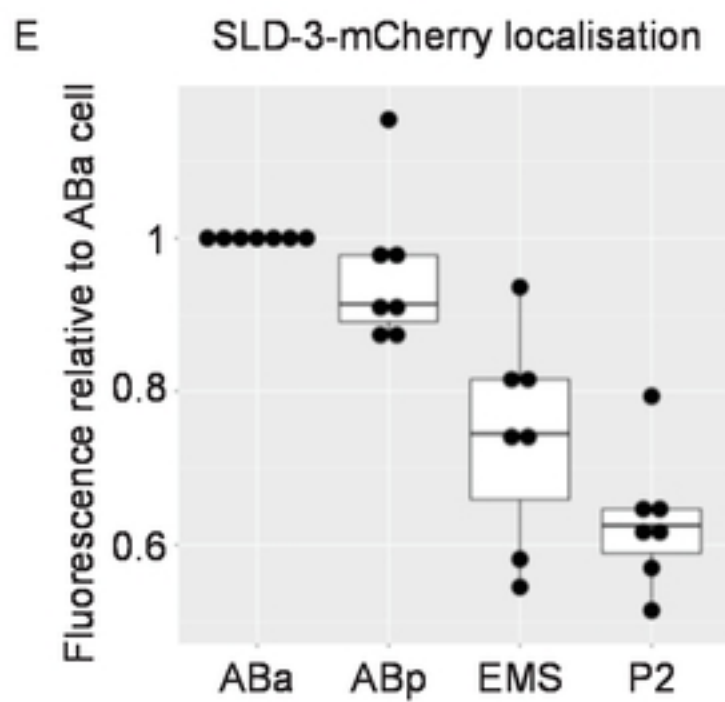

P-values

|     | ABp | EMS    | P2       |
|-----|-----|--------|----------|
| ABa | ns  | <0.005 | <0.00005 |
| ABp |     | <0.05  | <0.00005 |
| EMS |     |        | ns       |

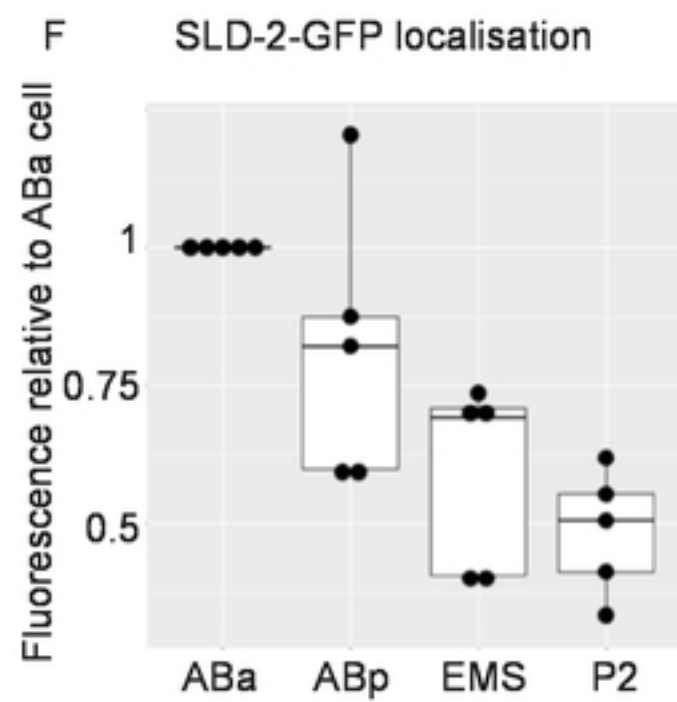

P-values

|     | ABp | EMS   | P2     |
|-----|-----|-------|--------|
| ABa | ns  | <0.05 | <0.005 |
| ABp |     | <0.05 | <0.05  |
| EMS |     |       | <0.05  |

Figure 5

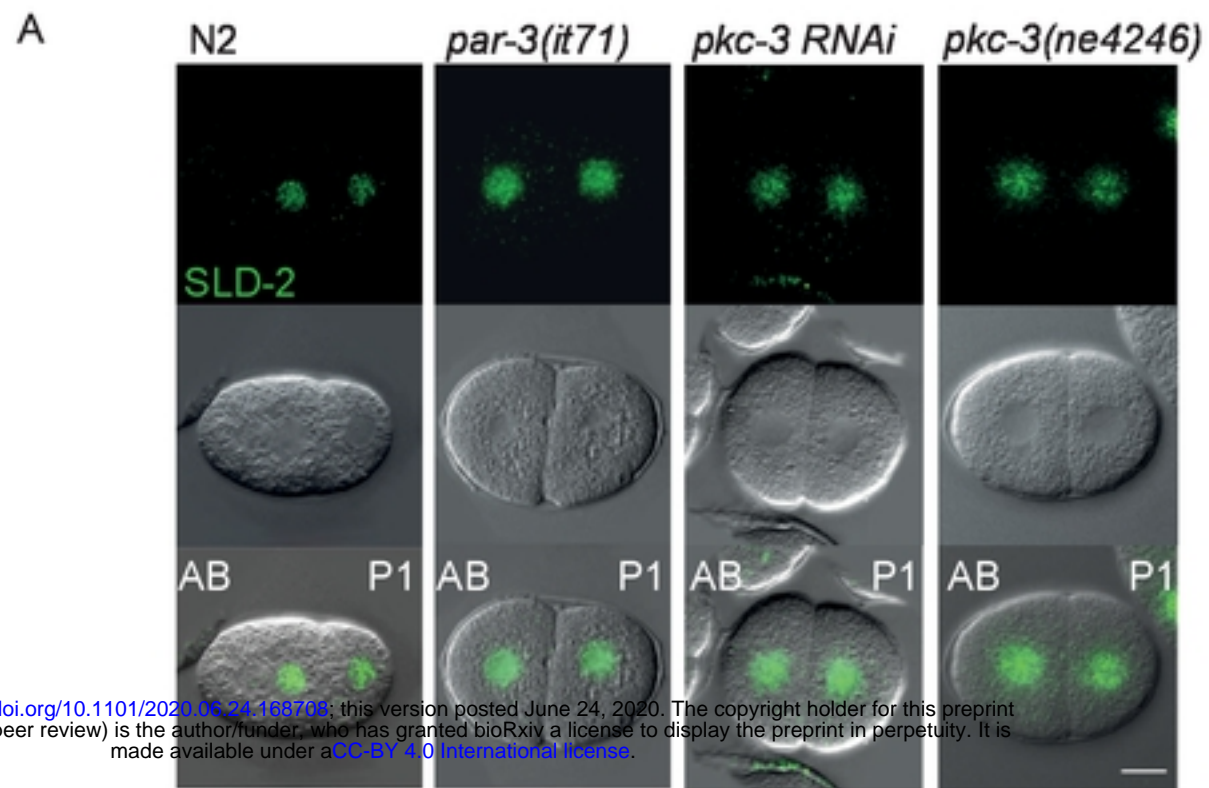

bioRxiv preprint doi: <https://doi.org/10.1101/2020.06.24.168708>; this version posted June 24, 2020. The copyright holder for this preprint (which was not certified by peer review) is the author/funder, who has granted bioRxiv a license to display the preprint in perpetuity. It is made available under aCC-BY 4.0 International license.

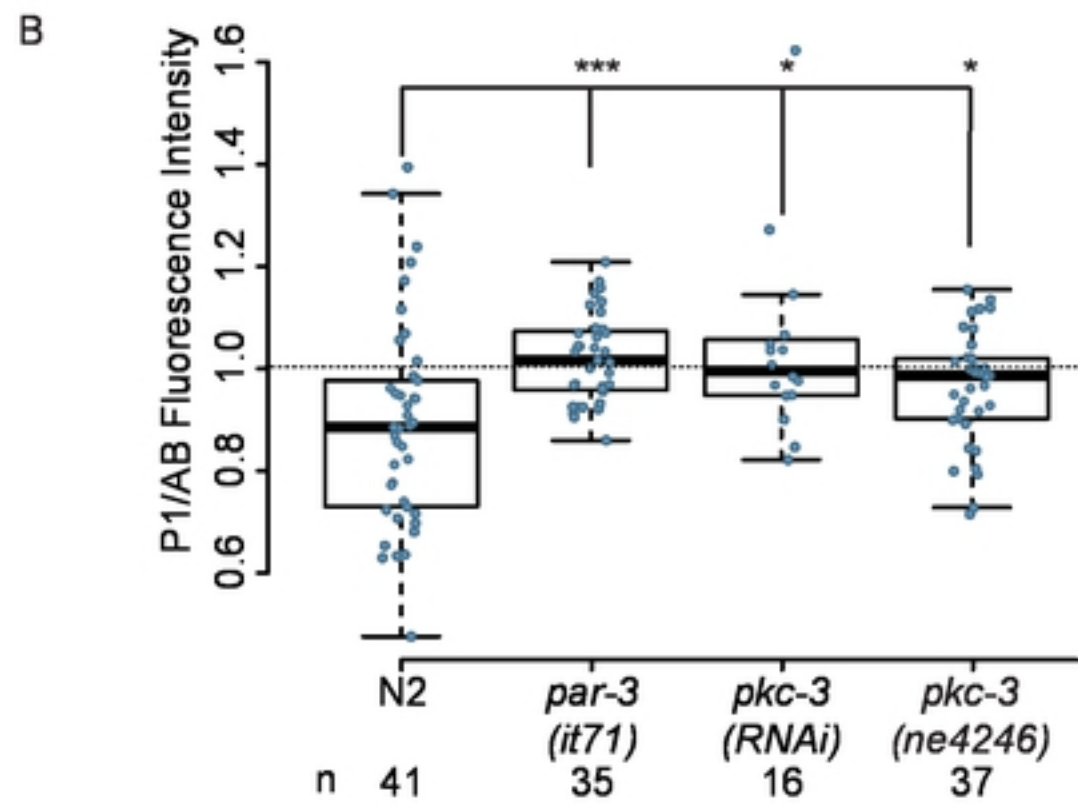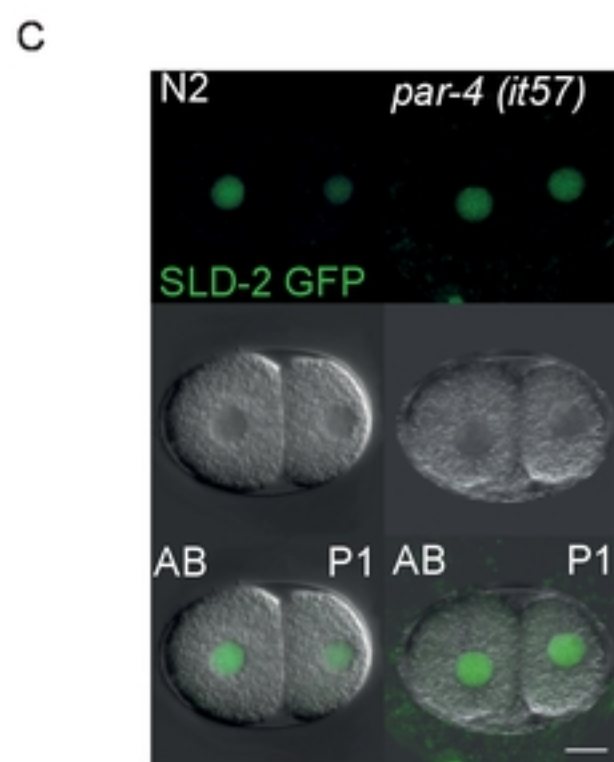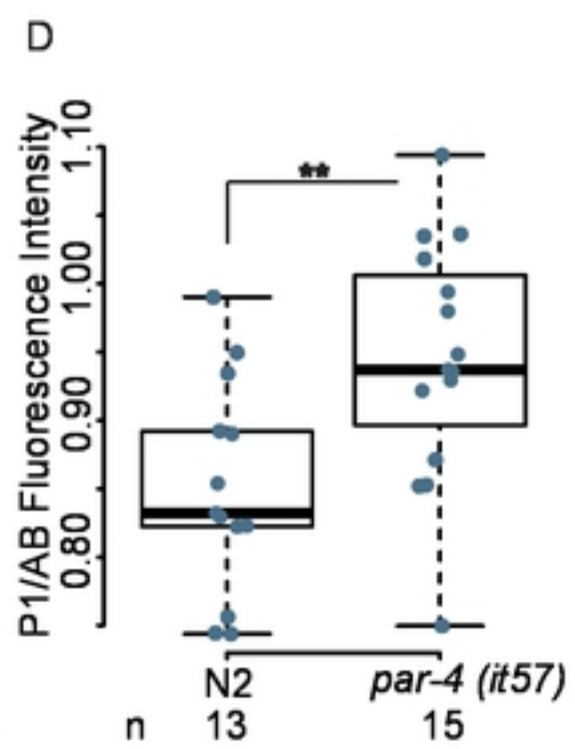



Figure 6

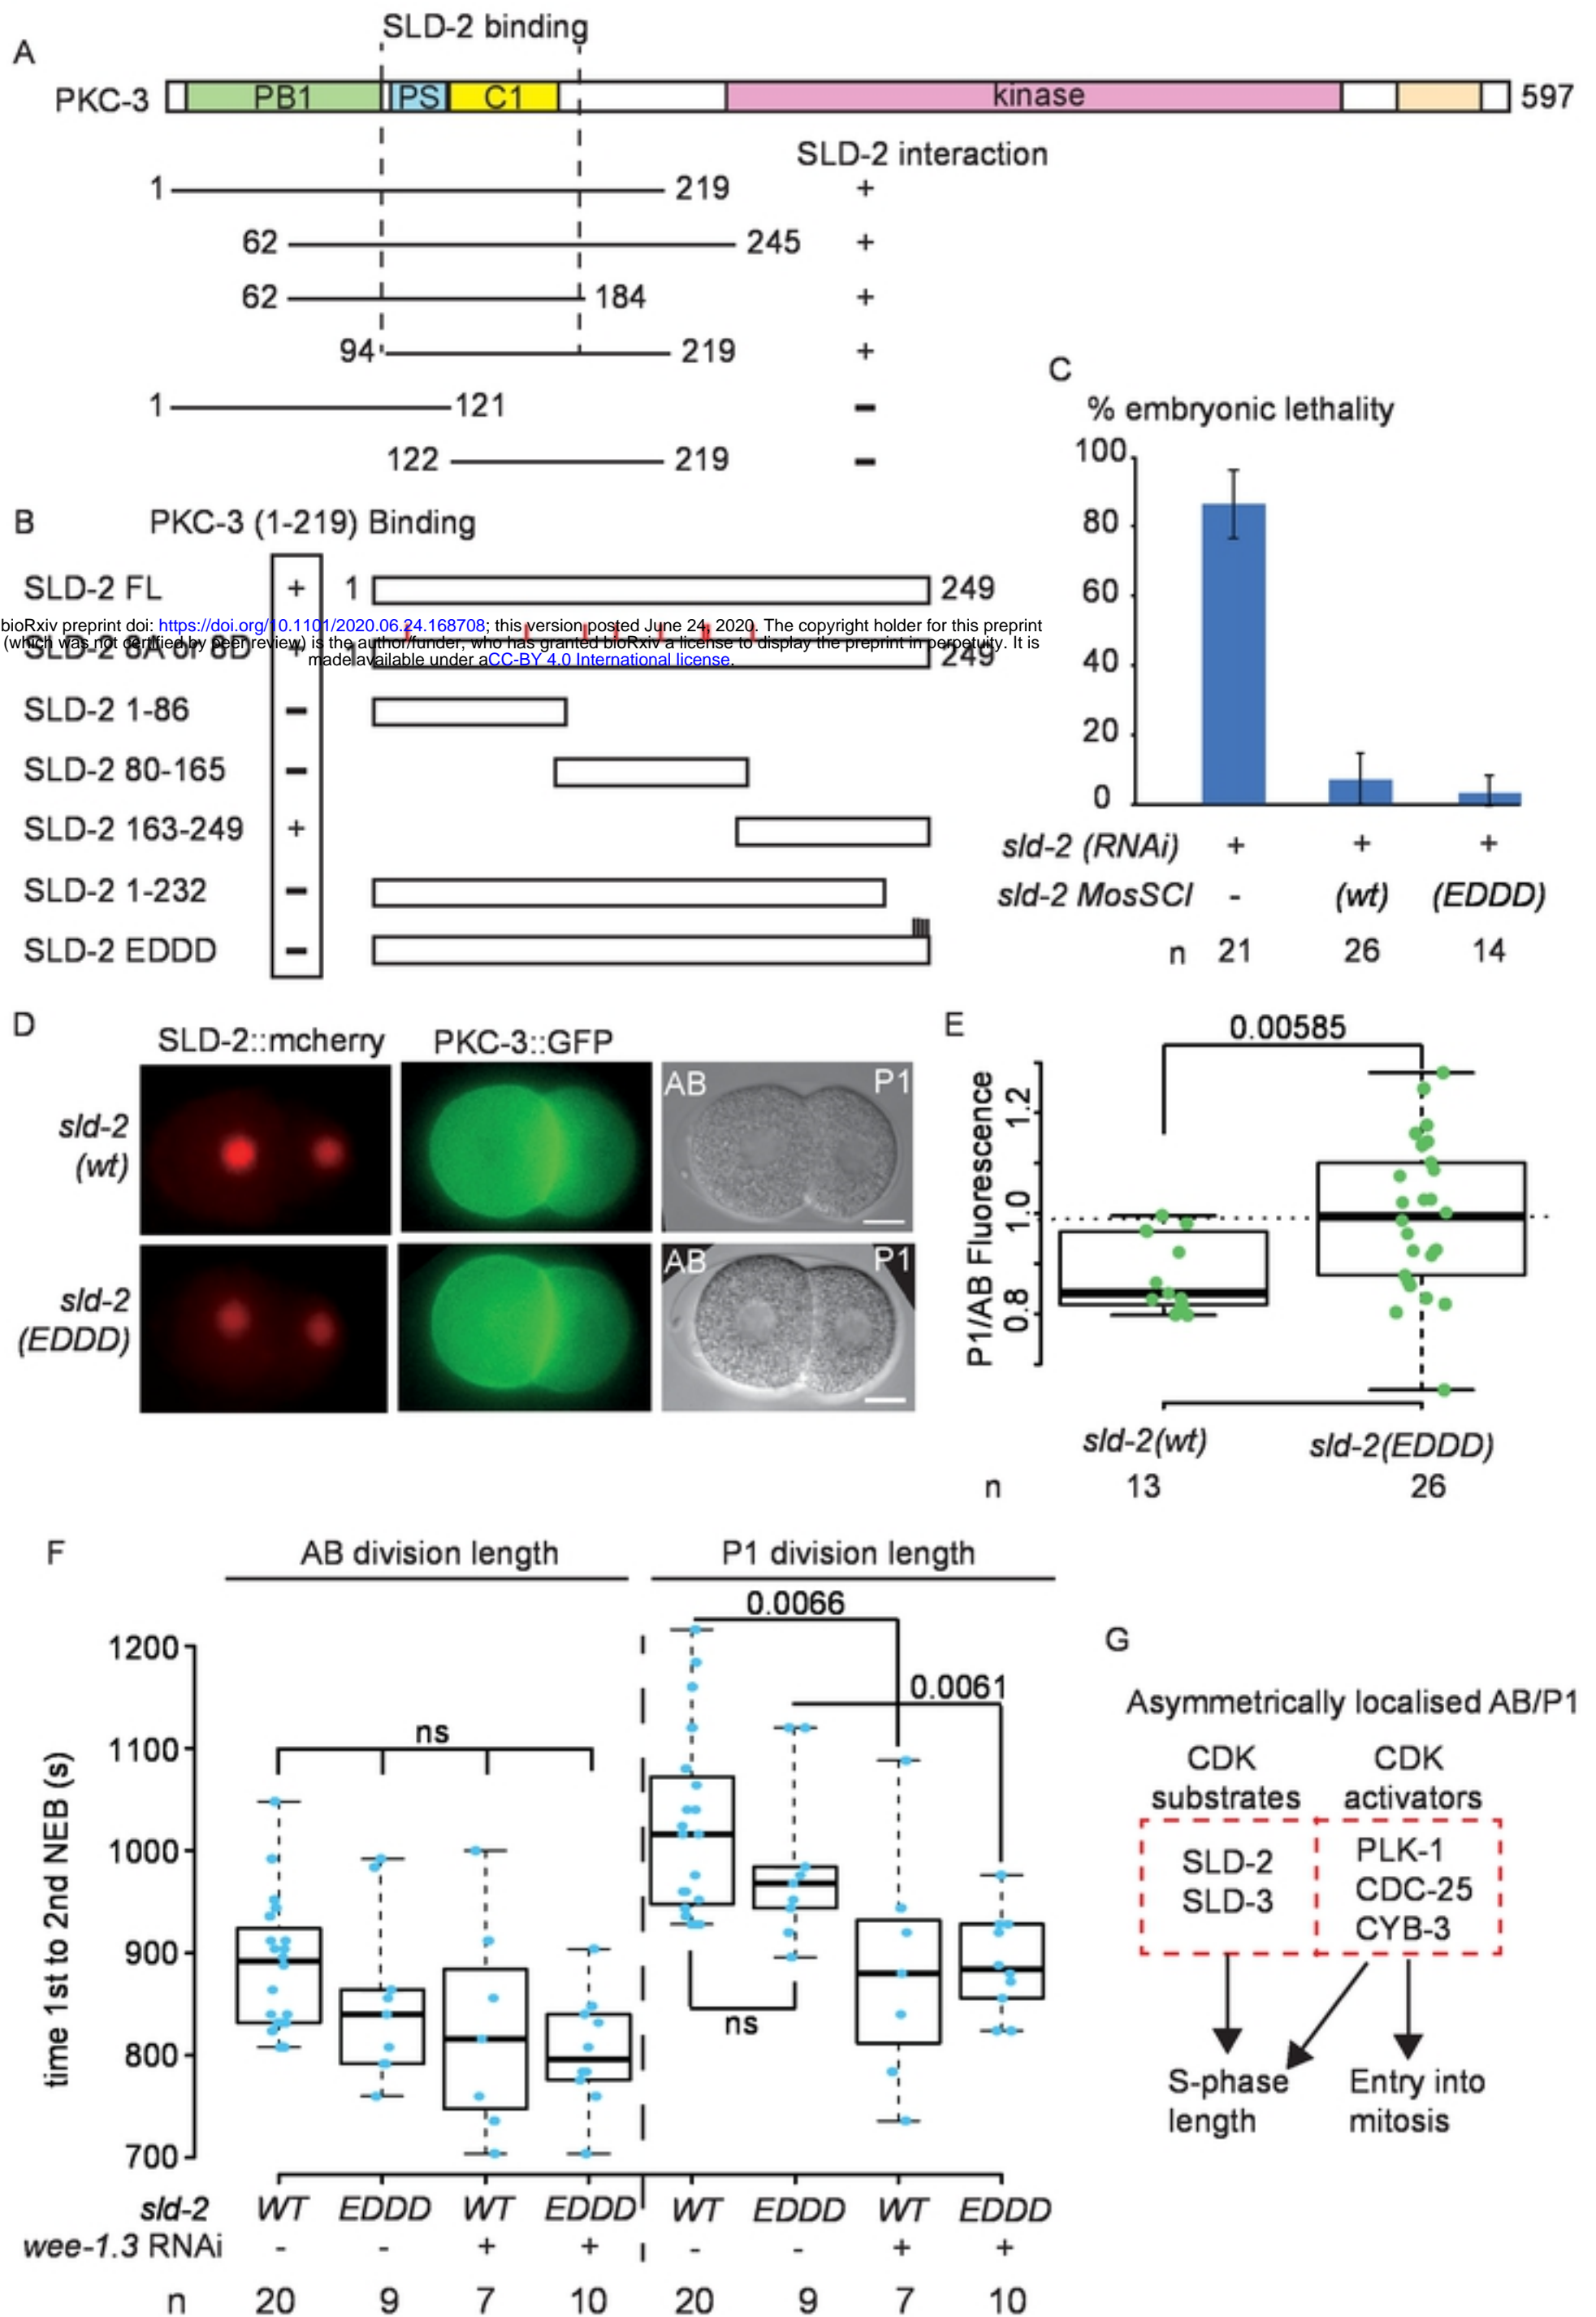

Source: https://www.biorxiv.org/content/10.1101/2020.06.24.168708v1.full.pdf
