# 1 Identification of the critical replication targets of CDK

## 2 reveals direct regulation of replication initiation

### 3 factors by the embryo polarity machinery in *C.*

#### 4 *elegans*

5

6 Short title: Embryo polarity directly regulates replication initiation factors

7

8 Vincent Gaggioli<sup>1,4</sup>, Manuela R. Kieninger<sup>1</sup>, Anna Klucnika<sup>1,3</sup>, Richard Butler<sup>1</sup>  
9 and Philip Zegerman<sup>\*1,2</sup>

10

11 <sup>^</sup>These authors contributed equally

12 <sup>1</sup> Wellcome Trust/Cancer Research UK Gurdon Institute, The Henry Wellcome

13 Building of Cancer and Developmental Biology, University of Cambridge CB2 1QN,

14 UK

15 <sup>2</sup> Department of Biochemistry, University of Cambridge, UK.

16 <sup>3</sup> Department of Genetics, University of Cambridge, UK.

17 <sup>4</sup> Current address: Department of Molecular Genetics, Erasmus University Medical

18 Center, Dr. Molewaterplein 40, 3015GD Rotterdam, The Netherlands

19 \* Corresponding author. e-mail: [p.zegerman@gurdon.cam.ac.uk](mailto:p.zegerman@gurdon.cam.ac.uk)

20 Tel: +44 (0)1223-334132

21

## 21    **Abstract**

22    During metazoan development, the cell cycle is remodelled to coordinate proliferation  
 23    with differentiation. Developmental cues cause dramatic changes in the number and  
 24    timing of replication initiation events, but the mechanisms and physiological  
 25    importance of such changes are poorly understood. Cyclin-dependent kinase (CDK)  
 26    is important for regulating S-phase length in many metazoa, and here we show in the  
 27    nematode *Caenorhabditis elegans* that an essential function of CDK during early  
 28    embryogenesis is to regulate the interactions between three replication initiation  
 29    factors SLD-3, SLD-2 and MUS-101 (Dpb11/TopBP1). Mutations that bypass the  
 30    requirement for CDK to generate interactions between these factors is sufficient for  
 31    viability in the absence of CyclinE/Cdk2, demonstrating that this is a critical  
 32    embryonic function of this cyclin/CDK complex. Both SLD-2 and SLD-3 are  
 33    asymmetrically localised in the early embryo and the levels of these proteins  
 34    inversely correlate with S-phase length. We also show that SLD-2 asymmetry is  
 35    determined by direct interaction with the polarity protein PKC-3. This study explains  
 36    the essential function of CDK for replication initiation in a metazoan and provides the  
 37    first direct molecular mechanism through which polarization of the embryo is  
 38    coordinated with DNA replication initiation.

39

## 39 **Author Summary**

40 How and when a cell divides changes as the cell assumes different fates. How these  
 41 changes in cell division are brought about are poorly understood, but are critical to  
 42 ensure that cells do not over-proliferate leading to cancer. The nematode *C. elegans*  
 43 is an excellent system to study the role of cell cycle changes during animal  
 44 development. Here we show that two factors SLD-2 and SLD-3 are critical to control  
 45 the decision to begin genome duplication. We show that these factors are differently  
 46 distributed to different cell lineages in the early embryo, which may be a key event in  
 47 determining the cell cycle rate in these cells. For the first time we show that, PKC-3,  
 48 a key component of the machinery that determines the front (anterior) from the back  
 49 (posterior) of the embryo directly controls SLD-2 distribution, which might explain  
 50 how the polarisation of the embryo causes changes in the proliferation of different  
 51 cell lineages. As PKC-3 is frequently mutated in human cancers, how this factor  
 52 controls cell proliferation may be important to understand tumour progression.

## 53 Introduction

54 Eukaryotes replicate their genomes from multiple origins that fire throughout S-phase  
 55 of the cell cycle. Programmed changes in the number, timing and position of origin  
 56 firing occur during differentiation and development across many metazoa [1]. As a  
 57 result, different cell types exhibit dramatic changes in the rate of S-phase and the  
 58 timing with which different parts of the genome are replicated. The mechanisms and  
 59 physiological importance of such changes in genome duplication during the lifetime  
 60 of an organism are very poorly understood. With its highly stereotypical cell divisions,  
 61 the early *C. elegans* embryo provides an ideal system to study the role of cell cycle  
 62 control during development. As early as the second embryonic division, polarity cues  
 63 generate cells with different S-phase lengths [2,3]. Activators of cyclin-dependent  
 64 kinase (CDK) are asymmetrically distributed in the early embryo [2,4-6] and CDK  
 65 activity has been shown to be important for determining the synchrony of division [6].  
 66 Despite this, how CDK controls embryonic cell cycle length is not known.

67 CDK plays a critical role in the initiation of DNA replication across eukaryotes [7]. In  
 68 budding yeast CDK phosphorylates two essential initiation factors Sld2 and Sld3,  
 69 which results in their phospho-dependent interaction with the BRCT repeats of  
 70 Dpb11 [8,9]. This CDK-dependent complex results in the recruitment of additional  
 71 proteins, such as the leading strand polymerase (Pol  $\epsilon$ ) and helicase activatory  
 72 factors, which together allow replisome assembly by a poorly understood mechanism  
 73 [10]. Phosphorylation of Sld2 and Sld3 and interaction with Dpb11 is sufficient for the  
 74 function of CDK in replication initiation in yeast, as mutations that drive the  
 75 interactions between these proteins can bypass the requirement for CDK to initiate  
 76 replication [8,9].

77 Importantly, Sld3, Sld2 and Dpb11, together with another replication initiation factor  
 78 Dbf4 are low abundance and rate limiting for replication initiation in yeast [11,12]. The

orthologues of these same factors are also limiting for S-phase length during the early embryonic divisions in *Xenopus* [13]. In *Drosophila*, increasing CDK activity is sufficient to reduce S-phase length in the early embryo [14], although the same is not true in *Xenopus* or zebrafish [15,16]. It would therefore seem that limiting CDK activity and/or low levels of the key CDK substrates, Sld3 and Sld2 and their binding partners might provide a simple mechanistic explanation for how diverse organisms regulate the rate of replication initiation and thus total S-phase length. Unfortunately the testing of this hypothesis has been hampered by the difficulties in identifying the true targets of CDK in replication initiation in developmental model systems [17].

We have previously provided the first example of an essential CDK substrate required for replication initiation in a metazoan through the characterisation of *C. elegans sld-2* [18]. Mutation of the CDK sites in *sld-2* to alanine prevented the interaction with the Dpb11 orthologue MUS-101 (also known as Cut5/TopBP1) and resulted in lethality, while phospho-mimicking mutations in these CDK sites restored the interaction with MUS-101 and restored viability [18]. Having characterised *sld-2* as an essential CDK target in *C. elegans* we set out to identify and characterise the Sld3 orthologue in this organism to determine the importance of regulation of both of these substrates during development. In this study we show that CDK-dependent regulation of *sld-2* and *sld-3* is sufficient to fulfil at least in part the essential functions of cyclin E/Cdk2 in *C. elegans*. Both SLD-2 and SLD-3 are asymmetrically localised in the early embryo and the asymmetry of SLD-2 is directly regulated by an interaction with the polarity factor PKC-3. This study provides the first direct link between the cell polarity machinery and DNA replication control and pinpoints *sld-2* and *sld-3* as potentially key factors for determining S-phase length in the early embryo in *C. elegans*.

## Results

### ZK484.4 is *C. elegans* SLD-3

To identify the CDK target Sld3/Treslin in *C. elegans*, we performed homology searches using the conserved Cdc45 interaction domain (also known as the Sld3/Treslin domain, orange, Fig 1A) [19,20]. From this, we identified ZK484.4 as the best-hit for a potential orthologue of Sld3/Treslin in *C. elegans* (Fig 1A). To determine whether ZK484.4 is a functional orthologue of Sld3, we first analysed the interactions of this protein with the replication initiation factors CDC-45 and MUS-101, the *C. elegans* orthologue of Dpb11/TopBP1. Yeast two-hybrid analysis revealed that the Sld3/Treslin domain of ZK484.4 (151-388) interacted with *C. elegans* CDC-45, while the C-terminus of SLD-3 (388-873) interacted with MUS-101 (Fig 1B). Interestingly ZK484.4 interacted with the region of MUS-101 (1-448) encompassing the N-terminal BRCT repeats (Fig 1B), which is the same region of interaction between Sld3-Dpb11 in yeast and Treslin-TopBP1 in *Xenopus*/humans [8,9,21,22]. These conserved interactions strongly suggested that ZK484.4 is indeed the *C. elegans* orthologue of Sld3/Treslin and we hereby refer to ZK484.4 as *sld-3*. Notably we did not identify an orthologue of the Sld3/Treslin interacting protein Sld7/MTBP [23].

As Sld3/Treslin is essential for replication initiation across eukaryotes we set out to test whether *sld-3* is also essential in *C. elegans*. RNAi of *sld-3* by injection indeed showed that this is an essential gene (Fig 1C). Consistently with a role for *sld-3* in DNA replication, partial knock down of *sld-3* through RNAi by feeding resulted in synthetic lethality with the *div-1* mutant in the B subunit of polymerase alpha [24] at the semi-permissive temperature (Fig 1D). Together these data confirm that ZK484.4 is likely to be the functional orthologue of *sld-3*.

### *C. elegans* SLD-3 has two essential CDK sites

Sld3/Treslin is a critical CDK substrate in yeast, *Xenopus* extracts and human cells

and CDK phosphorylation of Sld3/Treslin at two sites mediates the interaction with the N-terminal BRCT repeats of Dpb11/TopBP1 [8,9,21,25]. As *C. elegans* SLD-3 also interacts with the N-terminal region of MUS-101 (Fig 1B), we set out to determine whether CDK sites were crucial for this interaction. *C. elegans* *sld-3* has two CDK sites at positions 438 and 487, which show homology to the two essential sites in Sld3/Treslin (Fig 2A). Mutation of threonine 438 and 487 to alanine (hereafter called the 2A mutant) prevented the interaction between SLD-3 and MUS-101 (Fig 2B). To test whether this interaction is important *in vivo*, we inserted in the genome at a MosSCI site an additional RNAi insensitive copy of either wild type or *sld-3(2A)* fused to mCherry [26]. The expression of these MosSCI alleles was similar, as determined by mCherry fluorescence levels (see for example Fig S3B). Importantly, while the *sld-3* wild type allele fully rescued the *sld-3* RNAi lethality, the 2A mutant that cannot interact with MUS-101 could not rescue this lethality (Fig 2C). This suggests that the interaction between SLD-3 and MUS-101 is critical *in vivo* in *C. elegans*.

As phosphorylation of Sld3/Treslin is required for the interaction with Dpb11/TopBP1 [8,9,21,25] we wondered whether this was also the case in *C. elegans*. Significantly, mutation of the two essential CDK sites to aspartic acid (2D) or glutamic acid (2E), which potentially mimics phosphorylation of these sites, restored the interactions with MUS-101 (Fig 2B). Critically, while *sld-3* RNAi resulted in high levels of lethality as previously shown, an RNAi insensitive copy of *sld-3(2D)* partially rescued this lethality, while the *sld-3(2E)* allele almost fully rescued the loss of wild type *sld-3* (Fig 2D), unlike the situation for human Treslin [27]. Together this shows that mutations that mimic phosphorylation of *sld-3* at these two essential sites allow MUS-101 interaction and restore viability *in vivo*.

Since expression of the *sld-3(2D)* or *(2E)* mutants as a second copy restored viability after *sld-3* RNAi, we set out to generate these alleles at the endogenous locus by

CRISPR. While heterozygotes of the CRISPR-generated *sld-3(2D)* and *(2E)* mutants were viable, the homozygotes were sterile (Fig 2E). We wondered whether instead of mutating both CDK sites, mutation of just one site might be sufficient to generate viable alleles. Strains that were homozygous for either T438 or T487 mutated to alanine resulted in intermediate levels of embryonic death and infertility (Fig S1). While mutation of these individual sites to aspartic acid did not rescue the lethality/sterility, mutation of these sites to glutamic acid significantly reduced the lethality exhibited by the alanine mutants (Fig S1). Together with the analysis of the *sld-3* alleles as a second copy (Fig 2D), these data show that while alanine mutants of either of the two, or both CDK sites show lethality, phospho-mimicking mutants can bypass and rescue to some extent this lethality *in vivo*.

We are not sure why the *sld-3(2E)* allele shows high levels of viability after *sld-3* RNAi (Fig 2D), but not as a homozygous allele at the endogenous locus (Fig 2E). One possibility is that constitutive phospho-mimicking of these sites generates phenotypic issues by itself, indeed the CDK bypass mutants of Sld3 alone are sick in yeast [8]. We consider it more likely however that these alleles are simply not fully penetrant in mimicking the essential functions of *sld-3* and therefore behave as hypomorphs, which are viable in the presence of some background level of wild type protein (e.g after RNAi). Despite this, the phospho-mimicking mutants of the CDK sites in *sld-3*, which allow MUS-101 interaction, show dramatic rescue of *sld-3* RNAi lethality (Fig 2D) *in vivo*.

### **Bypass of CDK site phosphorylation in SLD-3 and SLD-2 is partially sufficient for cyclin E/CDK2 function**

In yeast, phospho-mimicking mutants of Sld2 and Sld3 fulfil the essential functions of CDK in DNA replication initiation [8,9]. In a previous study we characterised the Sld2 orthologue in *C. elegans* and identified the *sld-2(8D)* mutant as capable of bypassing



the requirement for the CDK sites in *sld-2* to allow interaction with the C-terminus of MUS-101 [18]. Here we have identified the *sld-3(2D)* and *(2E)* mutants that can bypass the requirement for the CDK sites to generate the crucial interaction between SLD-3 and the N-terminus of MUS-101 (Fig 2). Therefore we wondered to what extent the combination of these bypass mutants of *sld-3* and *sld-2* might be able to fulfil essential functions of CDK in *C. elegans* (Fig 3A). As in yeast, we might expect such CDK bypass mutants to be dominant, which is indeed the case for *sld-2(8D)* [18]. Combination of the CDK bypass mutant *sld-2(8D)* with *sld-3(2D)* or *(2E)*, expressed as extra copies at MosSCI sites, resulted in wild type levels of fertility and viability (Fig 3B and S2A).

Cyclin E/CDK2 is required for the G1-S transition and is responsible for DNA replication initiation, particularly in early embryonic divisions such as in *Drosophila* and *Xenopus* [28,29]. RNAi of either Cyclin E (*cye-1*) or *cdk-2* resulted in embryonic lethality, as expected [30] (Fig 3C-D and S2B). Expression of the *sld-2* or *sld-3* bypass alleles alone did not restore viability after *cye-1* or *cdk-2* RNAi (Fig S2B-C). Importantly combination of both *sld-2(8D)* and *sld-3(2D)* or *(2E)* resulted in significant rescue of viability of both *cye-1* and *cdk-2* RNAi (Fig 3C-D). These phenotypic rescues by the *sld-2/sld-3* bypass mutants were specific to cyclinE/Cdk2 RNAi, as we did not observe any rescue with Cyclin B1 (*cyb-1*) or Cyclin B3 (*cyb-3*) RNAi (Fig S2D-E). Unfortunately RNAi of *cya-1* (Cyclin A) had no phenotype in our hands (data not shown). Together these data show that *sld-2* and *sld-3* mutants that can bypass the requirement for the critical CDK sites for generating interactions with MUS-101 can fulfil some of the essential functions of Cyclin E/Cdk2 *in vivo* in *C. elegans*.

## **SLD-2 and SLD-3 are asymmetrically localised in the early embryo**

During the second embryonic division in *C. elegans*, the anterior AB cell has a faster cell cycle than the posterior P1 cell, which is in part due to a shorter S-phase in the

AB cell [2]. CDK activity is potentially differentially activated in these two cells due to the asymmetric distribution of CDK regulators, such as *cdc-25* and the cyclin *cyb-3* [4,6]. We wondered to what extent SLD-2 and SLD-3 regulation by CDK might contribute to this asynchrony of cell division, so we analysed the AB/P1 cell cycle duration using the *sld-2/sld-3* CDK bypass alleles. Fig 4A shows that the duration of the AB and P1 divisions remained very similar in the *sld-2(8D)/sld-2(2E)* mutant relative to wild type, suggesting that CDK phosphorylation of these targets alone is not limiting for S-phase duration in either of these cell divisions.

During this analysis of AB/P1 cycle length using the MosSCI *sld-3* and *sld-2* alleles, which are tagged with mCherry and GFP respectively, we observed that both SLD-3 and SLD-2 showed asymmetric localisation, with more protein in the AB cell nucleus, than P1 (Fig 4B/4C). This asymmetry was not limited to the MosSCI alleles, as we obtained a similar result using immuno-fluorescence of endogenous SLD-2 (Fig 4D). Interestingly the presence or absence of the essential CDK sites did not affect the asymmetric localisation of SLD-3 (Fig S3A-B). The asymmetry we observed was not an artefact of embryo staging, as the difference in abundance of SLD-2 was detected throughout interphase (Fig S3C).

Asymmetric and asynchronous divisions continue beyond the 2-cell stage, with the descendants of the AB cell (ABa and Abp) having shorter cell cycles than the descendants of the P1 cell (EMS and P2) with P2 having the longest S-phase of these cells [3,31]. We analysed the abundance of SLD-2 and SLD-3 in 4-cell stage embryos and these two proteins remained asymmetric at this stage with EMS and P2 having significantly less protein than the AB cell lineage (Fig 4E-F). SLD-2 abundance was also significantly lower in the P2 cell than the EMS cell (Fig 4F). Together these data show that SLD-2 and SLD-3 are present at levels that inversely correlate with S-phase length in the 2- and 4-cell *C. elegans* embryo.

## **PAR proteins control SLD-2 asymmetry**

The PAR polarity proteins (PAR-1 to -6) and PKC-3, which specify the anterior-posterior (A–P) axis in the early embryo, also regulate the asynchrony of cell division between the AB and P1 blastomeres [2]. *par-3* and *pkc-3* mutants divide synchronously and symmetrically at the 2-cell stage [2,32] and significant loss of function of either of these polarity genes resulted in subsequent symmetrical localisation of SLD-2 in the AB and P1 cell (Fig 5A-5B).

We have previously shown in *Xenopus* that nuclear-to-cytoplasmic ratios can affect S-phase length due to the amount of limiting replication initiation factors inherited after cell division [13]. As *par-3* and *pkc-3* mutants divide symmetrically (Fig 5A), we wondered whether the subsequent symmetry of SLD-2 was simply a consequence of equal distribution of cellular content after division. To test this we analysed the distribution of SLD-2 in *par-4* mutant embryos, which divide synchronously but still asymmetrically at the 2-cell stage, resulting in AB/P1 cells of similar size to wild type [33]. Significantly, SLD-2 was symmetrically localised in *par-4* mutant embryos, even though the P1 cell is smaller than the AB cell in these mutants (Fig 5C-D). Together this suggests that SLD-2 localisation is actively regulated by the PAR protein network not simply by the cellular volume at division.

## **PKC-3 interacts with SLD-2 and causes SLD-2 asymmetry in the embryo**

To understand the molecular mechanism of SLD-2 asymmetry, we performed a yeast two-hybrid screen between SLD-2 and a cDNA library from *C. elegans* embryos (data not shown). One of the hits from this screen was the polarity factor *pkc-3*, which is essential for defining the anterior domain in the 1-cell embryo [34]. SLD-2 interacts with the PKC-3 region 94-184, which encompasses the pseudosubstrate (PS) and C1 domains (Fig 6A). To assess the function of this interaction *in vivo*, we set out to

identify a separation of function mutant in *sld-2*, which lacked the PKC-3 interaction. Using yeast two-hybrid analysis we narrowed down the interaction to the very C-terminus of SLD-2, region 232-249 (Fig 6B). This is a highly basic region of SLD-2 (Fig S4A), which lacks any CDK sites. Indeed the SLD-2 mutant lacking all 8 CDK sites (either mutated to alanine or aspartic acid, 8A/8D) still interacted with PKC-3 (Fig 6B). To identify a mutant that no longer interacted with PKC-3 we made scanning mutations in the region 232-249 (Fig S4B-C). A mutation that converted the very C-terminal 4 amino acids from KKKY to the acidic residues EDDD indeed resulted in loss of the interaction with PKC-3 (Fig 6B and S4B-C) and we hereafter refer to this mutant as *sld-2(EDDD)*. To check whether these mutations affect the essential functions of *sld-2*, we tested whether *sld-2(EDDD)* expression rescued the lethality of *sld-2* RNAi. Insertion of either *sld-2* wild type or the *EDDD* mutant at a MosSCI site fully rescued the lethality of *sld-2* RNAi (Fig 6C) strongly suggesting that the *sld-2(EDDD)* mutant is not defective in any of the essential functions of *sld-2*.

To investigate the significance of the SLD-2 interaction with PKC-3 for SLD-2 localisation we generated *sld-2(WT)* and *sld-2(EDDD)* alleles by CRISPR. Homozygous *sld-2(EDDD)* strains were viable and showed no sterility phenotypes as expected from the MosSCI strains (Fig 6C and data not shown). Importantly while the wild type SLD-2 showed asymmetric localisation in the AB cell versus the P1 cell in 2-cell embryos as expected, the *sld-2(EDDD)* mutant which can no longer interact with PKC-3 exhibited equal localisation in AB and P1 cells (Fig 6D and 6E). This suggested that the interaction of SLD-2 with PKC-3 is important for the asymmetric localisation of SLD-2 in the early *C. elegans* embryo. Although PKC-3 is largely cytoplasmic and SLD-2 is mostly nuclear, SLD-2 becomes entirely cytoplasmic upon nuclear envelope breakdown and we do observe an enrichment of both nuclear and cytoplasmic SLD-2, in the AB versus the P1 cell (Fig S4D).

Having identified a mutant of *sld-2* that is no longer asymmetrically localised in 2-cell

embryos, we wondered if this had an effect on the cell cycle duration of this stage. The *sld-2(EDDD)* mutant alone had no effect on the duration of the AB or P1 cycle length (Fig 6F). Previous studies have shown the importance of the inhibitory phosphorylation of CDK for elongating the P1 cell division cycle [6] and we also observed a significant reduction in P1 cell cycle length after RNAi of the CDK inhibitory kinase *wee-1* (Fig 6F). Combined inhibition of *wee-1* with the *sld-2(EDDD)* mutant did not further reduce the P1 or AB cell cycle lengths (Fig 6F). Together these data show that the PAR protein network controls SLD-2 asymmetry through PKC-3 interaction, but on it's own symmetrical localisation of SLD-2 is not sufficient to advance the cell cycle at the 2-cell stage.

298

## 298 Discussion

299 It is vital for all organisms to make a perfect copy of the genome in every cell division.  
300 For eukaryotes this is achieved in large part by linking DNA replication control to  
301 CDK activation at the G1-S transition [7]. CDK plays a vital dual role in DNA  
302 replication, both as an inhibitor of the helicase loading step in the initiation reaction (a  
303 process called licensing) and as an activator of these loaded helicases during  
304 replisome assembly. In budding yeast, CDK activates replisome assembly by  
305 phosphorylation of Sld2 and Sld3, but the relative contribution of phosphorylation of  
306 these two proteins to replication initiation differs in other species [17]. CDK  
307 phosphorylation of the metazoan orthologue of Sld3 (Treslin/Ticrr/C15orf42) has  
308 been shown to be important for S-phase progression in human cells in culture  
309 [21,25,27], but evidence for an essential role for Sld2 (RecQ4/RecQL4)  
310 phosphorylation in vertebrate cells is lacking. Conversely, CDK phosphorylation of  
311 Sld3 is not essential in the fission yeast *S. pombe* and Sld3 orthologues are so far  
312 absent in *D. melanogaster* [17].

313 By characterising *sld-2* and *sld-3* in the nematode *C. elegans*, we show for the first  
314 time outside of budding yeast that both of these proteins mediate essential  
315 interactions with MUS-101 (Dpb11/Cut5/TopBP1) through critical CDK sites (Fig 1-2  
316 and [18]). Importantly phospho-mimicking mutants in both *sld-2* and *sld-3* that drive  
317 interactions with MUS-101 are partially sufficient for cyclin E/Cdk2 function in *C.*  
318 *elegans* (Fig 3). As the rescue of the *cye-1/cdk-2* RNAi with *sld-2(8D)/sld-3(8E)* is  
319 only partial we cannot rule out that there may be other CDK targets required for  
320 replication initiation in *C. elegans*, although it is also the case that the D and E  
321 mutants of *sld-2/sld-3* are not perfect phospho-mimics (Fig 2D). In addition, Cyclin  
322 E/Cdk2 has multiple functions in *C. elegans* such as contributing to embryo polarity  
323 [35] and cell cycle re-entry of differentiated cells [30,36]. While it is possible that  
324 some functions of cyclin E/Cdk2 may be compensated by other CDK complexes after

*cye-1/cdk-2* RNAi, it is important to note that, apart from a small number of blast cells, all cells differentiate and become post-mitotic before the completion of embryonic development in *C. elegans* [31]. Therefore our viability assays only assess the contribution of CyclinE/Cdk2 to cell proliferation during early embryogenesis.

A surprising feature of the *sld-2(8D)/sld-3(8E)* double mutant strain is that it is perfectly viable and fertile (Fig 2B and S2). Switch like activation of CDK at the G1-S transition is required to completely separate the period of replication licensing from initiation and bypass of phosphorylation of Sld2 and Sld3 results in genome instability and death in yeast [8,37]. Additional layers of regulation may contribute to viability in the *sld-2(8D)/sld-3(8E)* strain and one possibility is the activity of the Dbf4-dependent kinase DDK. Like CDK, DDK is important for replication initiation and Dbf4 is degraded by the APC/C in G1 phase in yeast, helping to prevent precocious replication initiation [7]. We have previously shown that APC/C-dependent control of Dbf4 is important in strains that mimic phosphorylation of Sld2/3 in yeast [8]. How the *sld-2(8D)/sld-3(8E)* strain maintains a separation of licensing from initiation in *C. elegans* remains to be determined.

The early embryonic divisions in many metazoa, such as in *Drosophila*, zebrafish and *Xenopus*, are extremely rapid, lack gap phases and are characterised by high rates of replication initiation. Cell cycle lengthening in these embryonic divisions coincides with activation of DNA damage checkpoint kinases and the down regulation of cyclin-dependent kinase (CDK) activity, through the inhibitory phosphorylation of CDK by Wee1 and down-regulation of the counteracting phosphatase Cdc25 (String/Twine in *Drosophila*) [38,39]. Inhibitory phosphorylation of CDK is likely critical for the introduction of G2 phase and for delaying entry into mitosis. In *Drosophila* however increasing CDK activity can also reduce S-phase length at the mid-blastula transition (MBT) [14], although expression of CDK mutants that cannot be inhibited by Wee1 does not affect S-phase length at the MBT in *Xenopus* or zebrafish [15,16].



In *C. elegans*, CDC-25 and the Polo-like kinase PLK-1 (which increases the nuclear accumulation of CDC-25) preferentially localise to the faster dividing AB cell in the early embryo [2,4-6], while checkpoint activation has been proposed to preferentially occur in the P1 cell [40]. RNAi of *wee-1* in *C. elegans* indeed results in faster division of the P1 cell [6]. Therefore in both *Drosophila* and *C. elegans*, inhibitory phosphorylation of CDK plays an important role in cell cycle lengthening in the embryo. Despite this, in both of these organisms cell cycle elongation begins with changes in replication initiation [41,42], but how this is achieved is not clear. In *Drosophila* embryos, CDK activity prevents the chromatin binding of Rif1, and loss of Rif1 to a large extent prevents normal cell cycle elongation in cycle 14 [43]. Rif1 is known to inhibit replication initiation through counteraction of DDK, but also causes changes in chromatin structure [44]. Despite this, RNAi of Rif1 is not sufficient to accelerate the early embryonic divisions in *C. elegans* (MK and PZ data not shown).

Here we show that bypass of SLD-2 and SLD-3 activation by CDK is not sufficient to change the cell cycle length in the early embryo (Fig 4A). This suggests that CDK phosphorylation of these two replication substrates is not limiting for S-phase length at least at the two-cell stage. Instead we show that the SLD-2 and SLD-3 proteins themselves are asymmetrically distributed (Fig 4-6). It is striking that both the regulators and the substrates of CDK are asymmetrically localised in the AB versus P1 cell in *C. elegans* (Fig 6G and [2,4-6]). Although symmetric localisation of SLD-2 alone was not sufficient for alter the early embryonic divisions (Fig 6F), we do not currently know how SLD-3 asymmetry is controlled to test the effect of equal distribution of both proteins towards cell cycle length.

SLD-2 asymmetry in the *C. elegans* embryo is controlled by direct interaction with the polarity factor PKC-3 (Fig 6), which is preferentially localised at the anterior of the embryo [32,45]. A simple mechanistic explanation for SLD-2 accumulation in the anterior AB nucleus over the posterior P1 nucleus is therefore that SLD-2 becomes



379 enriched in the AB cytoplasm (Fig S4D) by virtue of the established asymmetry of  
 380 PKC-3. In line with this hypothesis, the localisation of both SLD-2 and the anterior  
 381 polarity proteins, including PKC-3 are dependent on *par-3* and *par-4* (Fig 4 and  
 382 [46,47]). Although cell polarity has been shown to be required for S-phase length  
 383 control in the early *C. elegans* embryo [41], to our knowledge we have provided the  
 384 first direct link between the polarity network proteins and factors that are essential for  
 385 DNA replication initiation. This study may provide a platform to understand the  
 386 mechanism by which programmed developmental cues directly influence S-phase  
 387 length. As the human *pkc-3* orthologues are frequently mutated in cancers [48], this  
 388 new link between atypical PKC and factors required for genome duplication may  
 389 provide a novel mechanism by which this tumour suppressor affects cell proliferation.

390

## 391 **Figure legends**

### 392 **Fig 1. ZK484.4 is *C. elegans* *sld-3***

393 **A.** Scale diagram of Sld3, Treslin and ZK484.4 from budding yeast, humans and *C.*  
 394 *elegans* respectively. The Cdc45 interaction (Sld3/Treslin) domain is in orange. The  
 395 essential CDK sites in Sld3/Treslin and their potential orthologues in *C. elegans* are  
 396 numbered. The regions of interaction between *C. elegans* ZK484.4 and CDC-  
 397 45/MUS-101 are indicated below, together with a scale diagram of MUS-101 showing  
 398 the 6 BRCT repeats as grey boxes.

399 **B.** Yeast two-hybrid analysis between MUS-101 and CDC-45 bait constructs and  
 400 SLD-3 prey on non-selective (-Leu-Trp) and selective medium (-Leu-Trp-His+3-AT).

401 **C.** Box and whisker plot of embryonic lethality with and without *sld-3* RNAi by  
 402 injection.

403 **D.** As C except RNAi was performed by feeding at 21°C.

404

### 405 **Fig 2. Two CDK sites in SLD-3 are essential for the interaction with MUS-101**

406 **A.** Alignment of the CDK sites in Sld3/Treslin required for the interactions with  
 407 Dpb11/TopBP1. The amino acid numbers of the two orthologous CDK sites in *C.*  
 408 *elegans* SLD-3 are indicated below.

409 **B.** Yeast two-hybrid analysis between MUS-101 (1-448) and SLD-3 (389-557) wild  
 410 type (WT) or with the two CDK sites threonine 438 and 487 mutated to alanine (2A),  
 411 aspartic acid (2D) or glutamic acid (2E).

412 **C and D.** Box and whisker plot of embryonic lethality after *sld-3* RNAi by injection as

in Fig 1C. The extra, RNAi insensitive copies of *sld-3* are inserted at a MosSCI site and expressed from the *mex-5* promoter.

**E.** Ratio of progeny from heterozygous *+sld-3(2D)* (top) or *+sld-3(2E)* (bottom) parents. These 2D/2E mutations were generated by CRISPR at the endogenous *sld-3* locus.

### **Fig 3. Bypass of CDK site phosphorylation in SLD-3 and SLD-2 is partially sufficient for cyclinE/CDK-2 function**

**A.** CDK drives the interactions between SLD-2, SLD-3 and MUS-101 (top). The requirement for CDK can be bypassed using phospho-mimicking mutants in the essential CDK sites of SLD-2 (8D) or SLD-3 (2D or 2E).

**B.** Box plot of progeny size for the indicated strains containing *sld-2* and/or *sld-3* mutants as extra copies as MosSCI insertions.

**C and D.** Box plot of embryo lethality as in Fig 1C after *cye-1* (C) or *cdk-2* (D) RNAi by feeding in the indicated strains. \*\*\* P-value <0.005, \*\*0.006, \*0.0453.

### **Fig 4. SLD-3 and SLD-2 are asymmetrically localised in the early embryo**

**A.** Cell cycle length in the AB and P1 cell of the two-cell embryo in the indicated strains. Error bars are SD.

**B.** Images of two-cell embryos of wild type (N2) or containing *mex-5p::sld-3-mCherry::tbb-2 3-UTR* construct integrated at a MosSCI site. mCherry was visualised by IF, DNA was stained with Hoechst. Scale bar is 10µm

**C.** As B. Images of two-cell embryo containing *mex-5p::sld-2-gfp::tbb-2 3UTR*

integrated at a MosSCI site. GFP signal was detected with Confocal Laser Scanning Microscopy. Lower Image shows DIC channel. Scale bar is 10  $\mu$ m. (Right) Graph indicates the ratio of GFP signal intensity from the P1 cell over the signal from the AB cell. Error bars are 95% CI.

**D.** As C, except endogenous SLD-2 was detected by immunofluorescence.

**E and F.** Quantitation of SLD-3-mCherry signal by IF (E) and SLD-2-GFP signal by fluorescence imaging (F) in the four-cell embryo. The signal in the ABa cell was set to 1. n=7 for each measurement for E and n=5 for F. Below the p-values were obtained by paired t-tests, ns is not significant.

## **Fig 5. SLD-2 asymmetry is polarity-dependent**

**A.** Images of two-cell embryos from the indicated strains after SLD-2 IF. Scale bar is 10  $\mu$ m. N2, *par-3(it71)* and *pkc-3 RNAi* animals were grown at 20°C. The temperature-sensitive strain *pkc-3(ne4246)* was grown at 25°C

**B.** Box plot of the data from A. p-values were obtained using the Wilcoxon rank sum test.

**C.** Images of two-cell embryo of wild type (N2) and the temperature-sensitive *par-4(it57)* mutant containing *mex-5p::sld-2-gfp::tbb-2 3UTR* grown at 25°C. The fluorescent GFP signal was detected with Laser Confocal Scanning Microscopy. Scale bar is 10  $\mu$ m.

**D.** Box plot of the data from C. p-values were obtained using the Wilcoxon rank sum test.

## **Fig 6. SLD-2 asymmetry is PKC-3 interaction-dependent**

**A.** (Top) Scale diagram of *C. elegans* PKC-3. (Bottom) Diagram of PKC-3 fragments that were tested for yeast two-hybrid interaction with full length SLD-2. +/- represents whether the interaction was positive or negative.

**B.** Scale diagram of fragments of SLD-2 that were tested for yeast two-hybrid interaction with PKC-3 (1-219). +/- represents whether the interaction was positive or negative. SLD-2 8A or 8D refers to all 8 CDK sites mutated either alanine or aspartic acid. SLD-2 EDDD refers to residues 246-249 (KKKY) mutated to EDDD.

**C.** Embryonic lethality 16-40hrs post-injection from the wild type strain (N2) or MosSCI generated *mex-5p::sld-2(WT)::gfp::tbb-2 3UTR* or *mex-5p::sld-2(EDDD)::gfp::tbb-2 3UTR* strains. SLD-2 RNAi was done by injection. Error bars are 95% CI.

**D.** Live imaging of PKC-3 GFP and SLD-2 mCherry or SLD-2 EDDD mCherry generated by CRISPR. Scale bar is 10  $\mu$ m.

**E.** Detection of the nuclear SLD-2 signal by IF. Box plot graph shows the ratio of the fluorescent signal intensity from the P1 cell over the signal from the AB cell from the wild type strain (N2) and the mutant *sld-2 EDDD* generated by CRISPR.

**F.** Box plot of the AB and P1 cell cycle length from the indicated strains with and without *wee1.3* RNAi by feeding. Cell cycle length was calculated as the time from the P0 cell nuclear envelope breakdown (NEB) to the AB or P1 NEB from 8s time-lapse movies. p-values were calculated using the Wilcoxon test.

**G.** Both CDK substrates (SLD-2 and SLD-3) and CDK activators (PLK-1, CDC-25 and CYB-3) are asymmetrically localised at the 2-cell stage in *C. elegans*. The relative contribution of these localisations to asynchronous embryonic cell cycle lengths remains to be determined.

## 484 **Materials and Methods:**

485

### 486 **Strains:**

487 Standard conditions were used to maintain *C. elegans* cultures (Brenner, 1974). The  
 488 *C. elegans* Bristol strain N2 was used as wild type strain. Strains created by MosSCI  
 489 contain wobbled versions of *sld-2* or *sld-3*. The following strains were used in this  
 490 study: JA1564 (*weSi35 [Pmex-5::sld-2(wt)::egfp/tbb-2 3'UTR; cb-unc-119(+)] II; cb-*  
 491 *unc-119 (ed9) III*), JA1563(*weSi34 [Pmex-5::sld-2(8D)::egfp/tbb-2 3'UTR; cb-unc-*  
 492 *119(+)] II; cb-unc-119(ed9) III*) [18], KK300 (*par-4(it57ts)V*) [33], KK571 (*lon-1(e185)*  
 493 *par-3(it71)/qC1 [dpy-19(e1259) glp-1(q339)] III*) [49], KK1228 (*pkc-3(it309 [gfp::pkc-*  
 494 *3]) II*), WM150 (*pkc-3(ne4246)II*) [32] and EU548 (*div-1(or148ts) III*) [24].

495 Strains introduced in this study.

| name               | PAZ and zap name                                                                                      |
|--------------------|-------------------------------------------------------------------------------------------------------|
| <i>sld-3 WT</i>    | PAZ1 ( <i>zapSi1 (unc-119(ed9) III; [Pmex-5::sld-3(wt):: mcherry/tbb-2 3'UTR; cb-unc-119(+)] IV</i> ) |
| <i>sld-3 2A</i>    | PAZ2 ( <i>zapSi2 (unc-119(ed9) III; [Pmex-5::sld-3(2A):: mcherry/tbb-2 3'UTR; cb-unc-119(+)] IV</i> ) |
| <i>sld-3 2D</i>    | PAZ3 ( <i>zapSi3 (unc-119(ed9) III; [Pmex-5::sld-3(2D):: mcherry/tbb-2 3'UTR; cb-unc-119(+)] IV</i> ) |
| <i>sld-3 2E</i>    | PAZ4 ( <i>zapSi4 (unc-119(ed9) III; [Pmex-5::sld-3(2E):: mcherry/tbb-2 3'UTR; cb-unc-119(+)] IV</i> ) |
| <i>sld-3 T487A</i> | PAZ5 ( <i>sld-3 (zap5[sld-3 (T487A)])</i> )                                                           |
| <i>sld-3 T487D</i> | PAZ6 ( <i>sld-3 (zap6[sld-3 (T487D)])</i> )                                                           |
| <i>sld-3 T487E</i> | PAZ7 ( <i>sld-3 (zap7[sld-3 (T487E)])</i> )                                                           |
| <i>sld-3 T438A</i> | PAZ8 ( <i>sld-3 (zap8[sld-3 (T438A)])</i> )                                                           |
| <i>sld-3 T438D</i> | PAZ9 ( <i>sld-3 (zap9[sld-3 (T438D)])</i> )                                                           |
| <i>sld-3 T438E</i> | PAZ10 ( <i>sld-3 (zap10[sld-3 (T438E)])</i> )                                                         |

|                                  |                                                                                                                   |
|----------------------------------|-------------------------------------------------------------------------------------------------------------------|
| <i>+sld-3 2E</i>                 | PAZ11 ( <i>tmC18 [dpy-5(tmIs1200)] I; +/- sld-3(zap11[sld-3(2E)])</i> )                                           |
| <i>+sld-3 2D</i>                 | PAZ12 ( <i>tmC18 [dpy-5(tmIs1200)] I; +/- sld-3 (zap12[sld-3 (2D)])</i> )                                         |
| <i>sld-2 EDDD</i>                | PAZ13 ( <i>sld-2(zap13[sld-2<sup>(EDDD)</sup>])</i> )                                                             |
| <i>sld-2 EDDD-GFP</i>            | PAZ14 ( <i>zapSi14 (unc-119(ed9)) III; [Pmex-5::sld-2<sup>(EDDD)</sup>:: gfp/tbb-2 3'UTR; cb-unc-119(+)] IV</i> ) |
| <i>sld-2 EDDD 3xFLAG mCHERRY</i> | PAZ15 ( <i>sld-2(zap15[sld-2(EDDD)::3xFLAG::mcherry])</i> )                                                       |
| <i>sld-2 wt 3xFLAG mCHERRY</i>   | PAZ16 ( <i>sld-2 (zap16[sld-2(+)::3xFLAG::mcherry])</i> )                                                         |
| <i>sld-2 8D; sld-3 2E</i>        | PAZ17 ( <i>weSi34; zapSi4</i> )                                                                                   |
| <i>sld-2 8D; sld-3 2D</i>        | PAZ18 ( <i>weSi34; zapSi3</i> )                                                                                   |
| <i>sld-2 8D; sld-3 2E</i>        | PAZ19 ( <i>weSi34; +/-zap11</i> )                                                                                 |
| <i>sld-2 wt; sld-3 wt</i>        | PAZ20 ( <i>weSi35; zapSi1</i> )                                                                                   |
| <i>sld-2 wt; sld-3 2D</i>        | PAZ21 ( <i>weSi35; zapSi3</i> )                                                                                   |
| <i>sld-2 8D; sld-3 wt</i>        | PAZ22 ( <i>weSi34; zapSi1</i> )                                                                                   |

496

## 497 **Yeast-Two-Hybrid assays:**

498 Performed as previously described [18].

## 499 **Immunostaining:**

500 SLD-2 Immunofluorescence: Young adults were cut on a slide in a drop of M9 to  
501 release the young embryos. Embryos were freeze cracked and fixation with  
502 additional antibody incubation and washing steps were performed as described in  
503 [18]. The primary antibody was rabbit anti-SLD-2 (Ab 5058; [18]). SLD-2 antibody  
504 was used in a dilution of 1:100. Secondary antibody labelled with AlexaFluor488 anti-  
505 rabbit were obtained from Molecular Probes and used in a dilution of 1:500. Hoechst

stain was added 1:1000 into the secondary antibody dilution. Vectashield® Antifading Mounting Media was used for mounting. The temperature-sensitive mutant *pkc-3(ne4246)* was kept at 25°C overnight before the immunofluorescence experiment.

SLD-3 mCHERRY Immunofluorescence: Immunofluorescence was performed using a protocol adapted from [18]. Young adult hermaphrodites were cut to release embryos onto 0.1% poly-lysine (Sigma, P8920)-coated slides. Slides were covered with a 22x50mm coverslip and frozen on dry ice for 20 minutes. The coverslip was quickly removed while the slide where still frozen to permeabilise the embryos. Embryos were fixed in ice cold methanol for 30 seconds. Slides were additionally fixed in a fixing solution containing 4% Paraformaldehyde, 80mM Hepes, 1.6mM MgSO<sub>4</sub> and 0.8mM EGTA in PBS for 20 minutes at room temperature (RT). Samples were then washed in PBS and 0.2% Tween 20 (PBST) five times over 30 minutes, followed by blocking in 1% BSA in PBST (PBSTB) for one hour at RT. Slides were incubated in the primary antibody rabbit anti-RFP (600-401-379; Rockland antibodies and assays) (1:200) PBSTB solution overnight at 4°C. Slides were washed in PBST five times over 30 minutes, followed by incubation with the secondary antibody Alexa Fluor 594-conjugated donkey anti-rabbit antibody (A-21207; Molecular Probes) (1:500) and Hoechst 33342 stain (1:1000 final concentration 1 µg/mL) in PBSTB at RT for one hour. Samples were washed in PBST five times over 30 minutes and PBS five times over 20 minutes. Vectashield® Antifading Mounting Media was used for mounting.

#### **RNAi by feeding:**

The temperature-sensitive mutant strain EU548 (div-1(or148)) was synchronized by bleaching and grown at 15°C together with N2 wild type control. RNAi inducing plates were spotted with *slf-3* RNAi (this study, ZK484.4 ORF was cloned into L4440



plasmid) bacteria grown at 37°C for 7hrs. RNAi bacteria grown at 37°C for 7hrs. L1

worms were seeded on RNAi inducing plates and kept at 21°C until adulthood.

Young adults were singled on separate NGM plates and the embryonic lethality of

their progeny was determined.

For the embryonic lethality of *cdk-2*, *cyb-1* and *cye-1* RNAi bacteria were grown at

37°C for 7hrs in LB containing Ampicillin. Worm strains were synchronized by

bleaching. L4 worms were seeded on RNAi inducing plates with the respective RNAi

bacteria until they reached adulthood and were allowed to lay eggs for 24hrs. Plates

were kept at 25°C. The percentage of embryonic lethality of the F1 generation was

calculated by counting the number of hatched and unhatched progeny.

The wildtype strain N2 was used for *pkc-3* RNAi. Worms were synchronized by

bleaching. Plates were kept at 20°C. Mid L3 animals were seeded on RNAi inducing

plates. Young adults were used for SLD-2 immunofluorescence staining. A subset of

worms was singled to confirm PKC-3 knockdown by assessing embryonic lethality

(data not shown).

*wee1.3* RNAi by feeding was performed with the wildtype strain N2 and the Crispr

mutant *sld-2(zap13[sld-2(EDDD)])*. Worm strains were synchronized by bleaching.

Bacteria were grown at 37°C for 7hrs in LB containing Ampicillin. A dilution of 10%

(v/v) *wee-1.3* bacteria in L4440 control bacteria was used for seeding RNAi plates.

Because *wee-1.3* bacteria induced sterility, young adults were used for RNAi

induction overnight in 20°C. The next day the cell division timing was assessed by

time-lapse movies. A subset of worms was transferred to new plates to confirm *wee-*

*1.3* knockdown through embryonic lethality (data not shown).

*cyb-3* RNAi bacteria were grown in 37°C for 7hrs in LB containing Ampicillin. 2.5%

(v/v) *cyb-3* bacteria diluted in L4440 control bacteria was used for seeding RNAi

inducing plates. Worms were synchronized by bleaching. Plates were kept at 20°C.

L3 larva were seeded on RNAi plates. Young adult worms were singled out and allowed to lay eggs for 24hrs. After additional 36hrs the embryonic lethality was determined by counting the hatched and the unhatched progeny.

All RNAi experiments included the feeding of L4440 bacteria as a control.

### **RNAi by injections:**

*sld-3* RNAi injections: N2, PAZ1, PAZ2, PAZ3 and PAZ4 young adult hermaphrodites were injected with *sld-3* double stranded RNA, containing the entire coding region of ZK484.4 with a concentration of 100ng/μl. Injected worms were kept at 20°C and singled to separate NGM plates to assess the embryonic lethality in the F1 generation.

*sld-2* RNAi injections: N2, JA1564 and PAZ14 were synchronized by bleaching and grown at 20°C to the young adult stage. Young hermaphrodites were injected with *sld-2* double stranded RNA prepared from T12F5.1 with a concentration of 150ng/μl. Injected worms were incubated at 20°C. The injected worms were singled out after 16hrs post-injection and transferred on new plates every 24hrs for 3 days. The plates were assessed for total egg production and lethality in the embryos.

### **Microscopy and image analysis:**

Immunofluorescence of SLD-3 mCHERRY was visualized on a DeltaVision Deconvolution microscope. Z-stack images were taken and deconvoluted using the associated software.

The fluorescent signal of the nuclei was analysed with ImageJ. Z-stack images were combined using the Z-stack tool for maximum projection. The signals of the AB and p1 nuclei were normalized against background and the signal ratio of P1/AB visualized using R.

The immunofluorescent signal of SLD-2 staining and in-vivo imaging of the SLD-2 GFP signal in JA1563 and *weSi35; par-4(it57)* were visualized using Leica S8 Laser Confocal microscope. Z-stack images through the whole embryo were taken. Images were analysed with ImageJ. Using the maximum projection z-stack tool the fluorescent signal of the nuclei was measured and normalized for background signal. Relative Fluorescence analysis of SLD-3 and SLD-2 signal in the four-cell embryo: Z-stack images of SLD-3 and SLD-2 IF was analysed using ImageJ. The fluorescent intensity signal of the different nuclei was obtained using the maximum projection tool. The signal in Aba was set to 1. The signal was normalized for background using the signal of the AB cytoplasm.

#### **SLD-2 GFP localization kinetics:**

Time lapse z-stack movies of 1 min intervals were taken from early embryos of JA1564 with a Deltavision microscope using a 60x oil objective. The embryonic development of the pronuclei meeting to the nuclear envelope breakdown of the AB cell was recorded. The fluorescent signal intensity in the AB cell and the P1 cell was analysed using automated image analysis script run in ImageJ. The newly developed programme recognises the AB and the P1 cells in the Nomarski channel. Within the cells it measures an expanded area in the fluorescent GFP channel. The nuclear signal is normalised to the background intensity for both cells in each image per timepoint. The signal intensity is shown as Z-intensity.

#### **Cell cycle length analysis:**

Cell cycle length was analysed for N2 and *weSi34; zapSi4*. Cell cycle length analysis was also done for N2 and *sld-2(zap13[sld-2EDDD])* for *wee1.3* RNAi. Time lapse z-stack movies were taken starting from pronuclei migration until the four-cell stage of the early embryo development in *C. elegans*. The time lapse interval was 8s. Cell

cycle time of the AB cell was calculated as the time starting from pronuclei fusion until nuclear envelope breakdown of the AB cell. Movie was taken using a Deltavision microscope with Nomarski optics and a 60X oil objective. Cell cycle timing of the P1 cell was calculated as the time from pronuclei fusion until the nuclear envelope breakdown of the P1 cell.

#### **Progeny assays:**

N2, JA1563, PAZ3, *weSi34*; *zapSi3* and *weSi34*; *zapSi4* were synchronized by bleaching. Plates were kept at 25°C. L4 (P0) were singled on NGM plates seeded with OP50. After 24hrs P0 worm was transferred on new plate. This was done for five days until egg production stopped. The total production of fertilized eggs from each animal was calculated.

#### **CRISPR *sld-3(2D)* and *sld-3(2E)* progeny analysis:**

Heterozygous hermaphrodites of *sld-3(2D)* and *sld-3(2E)* and homozygotes single site mutants were allowed to lay eggs at 20°C. Their larvae were singled on new plates and checked for sterility. After two days after reaching adulthood they were lysed and genotyped by PCR for the *sld-3* locus.

#### **Embryonic lethality assays:**

The *sld-3* Crispr mutants (*sld-3(paz5)*, *sld-3(paz6)*, *sld-3(paz7)*, *sld-3(paz8)*, *sld-3(paz9)*, *sld-3(paz10)*) were tested for embryonic lethality. N2 was used as a control. Plates were kept at 20°C. Young adults were singled on new plates and allowed to

lay eggs for 24hrs. The hermaphrodite was then removed and the embryonic lethality was determined after additional 36 hours.

The *sld-2(8D); sld-3(2E)* MosSCI strain was tested for embryonic lethality. N2 and *weSi34; zapSi4* were synchronized by bleaching. The plates were grown in 25°C until mid-J4 stage. Worms were singled on new plates and transferred again to new plates every 24hrs for five days until egg production stopped. Living larva and unhatched eggs were counted after additional 24hrs. Experiment was performed in 25°C.

## Acknowledgements

Thanks to Julie Ahringer for strains WM150 and KK571 and discussions. We thank Nathan Goehring for the worm strain KK1228 and strains KK300 and EU548 were obtained from the CGC. Work in the PZ lab was supported by AICR 10-0908, Wellcome Trust 107056/Z/15/Z and Gurdon Institute funding (Cancer Research UK C6946/A14492, Wellcome Trust 092096). MK was supported by HFSP grant LT000681/2017-L. AK was supported by Wellcome Trust studentship 203767/Z/16/Z.

## 648     **References**

- 649     1. Nordman J, Orr-Weaver TL (2012) Regulation of DNA replication during  
650                     development. *Development* 139: 455-464.
- 651     2. Tavernier N, Labbe JC, Pintard L (2015) Cell cycle timing regulation during  
652                     asynchronous divisions of the early *C. elegans* embryo. *Exp Cell Res* 337:  
653                     243-248.
- 654     3. Edgar LG, McGhee JD (1988) DNA synthesis and the control of embryonic gene  
655                     expression in *C. elegans*. *Cell* 53: 589-599.
- 656     4. Rivers DM, Moreno S, Abraham M, Ahringer J (2008) PAR proteins direct  
657                     asymmetry of the cell cycle regulators Polo-like kinase and Cdc25. *J Cell*  
658                     *Biol* 180: 877-885.
- 659     5. Budirahardja Y, Gonczy P (2008) PLK-1 asymmetry contributes to asynchronous  
660                     cell division of *C. elegans* embryos. *Development* 135: 1303-1313.
- 661     6. Michael WM (2016) Cyclin CYB-3 controls both S-phase and mitosis and is  
662                     asymmetrically distributed in the early *C. elegans* embryo. *Development*  
663                     143: 3119-3127.
- 664     7. Labib K (2010) How do Cdc7 and cyclin-dependent kinases trigger the initiation of  
665                     chromosome replication in eukaryotic cells? *Genes Dev* 24: 1208-1219.
- 666     8. Zegerman P, Diffley JF (2007) Phosphorylation of Sld2 and Sld3 by cyclin-  
667                     dependent kinases promotes DNA replication in budding yeast. *Nature* 445:  
668                     281-285.
- 669     9. Tanaka S, Umemori T, Hirai K, Muramatsu S, Kamimura Y, et al. (2007) CDK-  
670                     dependent phosphorylation of Sld2 and Sld3 initiates DNA replication in  
671                     budding yeast. *Nature* 445: 328-332.
- 672     10. Bell SP, Labib K (2016) Chromosome Duplication in *Saccharomyces cerevisiae*.  
673                     *Genetics* 203: 1027-1067.
- 674     11. Mantiero D, Mackenzie A, Donaldson A, Zegerman P (2011) Limiting replication  
675                     initiation factors execute the temporal programme of origin firing in budding  
676                     yeast. *EMBO J* 30: 4805-4814.
- 677     12. Tanaka S, Nakato R, Katou Y, Shirahige K, Araki H (2011) Origin association of  
678                     Sld3, Sld7, and Cdc45 proteins is a key step for determination of origin-firing  
679                     timing. *Curr Biol* 21: 2055-2063.
- 680     13. Collart C, Allen GE, Bradshaw CR, Smith JC, Zegerman P (2013) Titration of four  
681                     replication factors is essential for the *Xenopus laevis* midblastula transition.  
682                     *Science* 341: 893-896.

683 14. Farrell JA, Shermoen AW, Yuan K, O'Farrell PH (2012) Embryonic onset of late  
684 replication requires Cdc25 down-regulation. *Genes Dev* 26: 714-725.

685 15. Dalle Nogare DE, Pauerstein PT, Lane ME (2009) G2 acquisition by  
686 transcription-independent mechanism at the zebrafish midblastula transition.  
687 *Dev Biol* 326: 131-142.

688 16. Collart C, Smith JC, Zegerman P (2017) Chk1 Inhibition of the Replication Factor  
689 Drf1 Guarantees Cell-Cycle Elongation at the *Xenopus laevis* Mid-blastula  
690 Transition. *Dev Cell* 42: 82-96 e83.

691 17. Zegerman P (2015) Evolutionary conservation of the CDK targets in eukaryotic  
692 DNA replication initiation. *Chromosoma* 124: 309-321.

693 18. Gaggioli V, Zeiser E, Rivers D, Bradshaw CR, Ahringer J, et al. (2014) CDK  
694 phosphorylation of SLD-2 is required for replication initiation and germline  
695 development in *C. elegans*. *J Cell Biol* 204: 507-522.

696 19. Itou H, Muramatsu S, Shirakihara Y, Araki H (2014) Crystal structure of the  
697 homology domain of the eukaryotic DNA replication proteins Sld3/Treslin.  
698 *Structure* 22: 1341-1347.

699 20. Sanchez-Pulido L, Diffley JF, Ponting CP (2010) Homology explains the  
700 functional similarities of Treslin/Ticrr and Sld3. *Curr Biol* 20: R509-510.

701 21. Boos D, Sanchez-Pulido L, Rappas M, Pearl LH, Oliver AW, et al. (2011)  
702 Regulation of DNA replication through Sld3-Dpb11 interaction is conserved  
703 from yeast to humans. *Curr Biol* 21: 1152-1157.

704 22. Kumagai A, Shevchenko A, Shevchenko A, Dunphy WG (2010) Treslin  
705 collaborates with TopBP1 in triggering the initiation of DNA replication. *Cell*  
706 140: 349-359.

707 23. Kohler K, Sanchez-Pulido L, Hofer V, Marko A, Ponting CP, et al. (2019) The  
708 Cdk8/19-cyclin C transcription regulator functions in genome replication  
709 through metazoan Sld7. *PLoS Biol* 17: e2006767.

710 24. Encalada SE, Martin PR, Phillips JB, Lyczak R, Hamill DR, et al. (2000) DNA  
711 replication defects delay cell division and disrupt cell polarity in early  
712 *Caenorhabditis elegans* embryos. *Dev Biol* 228: 225-238.

713 25. Kumagai A, Shevchenko A, Shevchenko A, Dunphy WG (2011) Direct regulation  
714 of Treslin by cyclin-dependent kinase is essential for the onset of DNA  
715 replication. *J Cell Biol* 193: 995-1007.

716 26. Frokjaer-Jensen C, Davis MW, Hopkins CE, Newman BJ, Thummel JM, et al.  
717 (2008) Single-copy insertion of transgenes in *Caenorhabditis elegans*. *Nat*  
718 *Genet* 40: 1375-1383.

719 27. Sansam CG, Goins D, Siefert JC, Clowdus EA, Sansam CL (2015) Cyclin-  
720 dependent kinase regulates the length of S phase through TICRR/TRESLIN  
721 phosphorylation. *Genes Dev* 29: 555-566.

722 28. Jackson PK, Chevalier S, Philippe M, Kirschner MW (1995) Early events in DNA  
723 replication require cyclin E and are blocked by p21CIP1. *J Cell Biol* 130:  
724 755-769.

725 29. Knoblich JA, Sauer K, Jones L, Richardson H, Saint R, et al. (1994) Cyclin E  
726 controls S phase progression and its down-regulation during *Drosophila*  
727 embryogenesis is required for the arrest of cell proliferation. *Cell* 77: 107-  
728 120.

729 30. Fay DS, Han M (2000) Mutations in *cye-1*, a *Caenorhabditis elegans* cyclin E  
730 homolog, reveal coordination between cell-cycle control and vulval  
731 development. *Development* 127: 4049-4060.

732 31. Sulston JE, Schierenberg E, White JG, Thomson JN (1983) The embryonic cell  
733 lineage of the nematode *Caenorhabditis elegans*. *Dev Biol* 100: 64-119.

734 32. Rodriguez J, Peglion F, Martin J, Hubatsch L, Reich J, et al. (2017) aPKC Cycles  
735 between Functionally Distinct PAR Protein Assemblies to Drive Cell Polarity.  
736 *Dev Cell* 42: 400-415 e409.

737 33. Watts JL, Morton DG, Bestman J, Kemphues KJ (2000) The *C. elegans* *par-4*  
738 gene encodes a putative serine-threonine kinase required for establishing  
739 embryonic asymmetry. *Development* 127: 1467-1475.

740 34. Hoege C, Hyman AA (2013) Principles of PAR polarity in *Caenorhabditis elegans*  
741 embryos. *Nat Rev Mol Cell Biol* 14: 315-322.

742 35. Cowan CR, Hyman AA (2006) Cyclin E-Cdk2 temporally regulates centrosome  
743 assembly and establishment of polarity in *Caenorhabditis elegans* embryos.  
744 *Nat Cell Biol* 8: 1441-1447.

745 36. Korzelius J, The I, Ruijtenberg S, Prinsen MB, Portegijs V, et al. (2011)  
746 *Caenorhabditis elegans* cyclin D/CDK4 and cyclin E/CDK2 induce distinct  
747 cell cycle re-entry programs in differentiated muscle cells. *PLoS Genet* 7:  
748 e1002362.

749 37. Tanaka S, Araki H (2011) Multiple regulatory mechanisms to inhibit untimely  
750 initiation of DNA replication are important for stable genome maintenance.  
751 *PLoS Genet* 7: e1002136.

752 38. Kermi C, Lo Furno E, Maiorano D (2017) Regulation of DNA Replication in Early  
753 Embryonic Cleavages. *Genes (Basel)* 8.



39. Farrell JA, O'Farrell PH (2014) From egg to gastrula: how the cell cycle is remodeled during the *Drosophila* mid-blastula transition. *Annu Rev Genet* 48: 269-294.
40. Brauchle M, Baumer K, Gonczy P (2003) Differential activation of the DNA replication checkpoint contributes to asynchrony of cell division in *C. elegans* embryos. *Curr Biol* 13: 819-827.
41. Benkemoun L, Descoteaux C, Chartier NT, Pintard L, Labbe JC (2014) PAR-4/LKB1 regulates DNA replication during asynchronous division of the early *C. elegans* embryo. *J Cell Biol* 205: 447-455.
42. Shermoen AW, McClelland ML, O'Farrell PH (2010) Developmental control of late replication and S phase length. *Curr Biol* 20: 2067-2077.
43. Seller CA, O'Farrell PH (2018) Rif1 prolongs the embryonic S phase at the *Drosophila* mid-blastula transition. *PLoS Biol* 16: e2005687.
44. Boos D, Ferreira P (2019) Origin Firing Regulations to Control Genome Replication Timing. *Genes (Basel)* 10.
45. Cuenca AA, Schetter A, Aceto D, Kemphues K, Seydoux G (2003) Polarization of the *C. elegans* zygote proceeds via distinct establishment and maintenance phases. *Development* 130: 1255-1265.
46. Hung TJ, Kemphues KJ (1999) PAR-6 is a conserved PDZ domain-containing protein that colocalizes with PAR-3 in *Caenorhabditis elegans* embryos. *Development* 126: 127-135.
47. Tabuse Y, Izumi Y, Piano F, Kemphues KJ, Miwa J, et al. (1998) Atypical protein kinase C cooperates with PAR-3 to establish embryonic polarity in *Caenorhabditis elegans*. *Development* 125: 3607-3614.
48. Newton AC (2018) Protein kinase C as a tumor suppressor. *Semin Cancer Biol* 48: 18-26.
49. Watts JL, Etemad-Moghadam B, Guo S, Boyd L, Draper BW, et al. (1996) par-6, a gene involved in the establishment of asymmetry in early *C. elegans* embryos, mediates the asymmetric localization of PAR-3. *Development* 122: 3133-3140.

## Supplementary Fig Legends

### **Fig S1.** Analysis of single CDK site mutants in *sld-3*

**A.** Alignment of the CDK sites in Sld3/Treslin required for the interactions with Dpb11/TopBP1. The amino acid numbers of the two orthologous CDK sites in *C. elegans* SLD-3 are indicated below.

**B and C.** Box plots of progeny size (B) and embryonic lethality (C) of a wild type strain (N2) or strains with the CDK site T487 mutated to alanine, aspartic acid or glutamic acid by CRISPR.

**D and E.** As B/C except for the T438 CDK site.

### **Fig S2.** Bypass of Sld3 and Sld2 phosphorylation is partially sufficient for cyclin E function.

**A.** Box plots of embryonic lethality from strains containing extra copies of *sld-2* / *sld-3*, both of which are inserted at a MosSCI sites and expressed from the *mex-5* promoter.

**B-E.** As A, but with RNAi of *cye-1* (B and C), *cyb-1* (D) or *cyb-3* (E).

### **Fig S3.** SLD-3 and SLD-2 are asymmetrically localised in the early embryo

**A.** Box plot of SLD-3 mCherry signal ratio between the P1 and the AB cell.

**B.** Images from A. Images show brightfield, Hoescht and mCherry signal of the wild type (N2) or the respective MosSCI lines. mCherry signal corresponds to SLD-3 expression in the two-cell embryo. Scale bar is 10µm.

**C.** Quantitation of SLD-2-GFP fluorescence from live imaging. Graph shows fluorescent intensity signal of the AB and P1 cell. The graph represents one-minute time-lapse movies of two cell embryos. The time point 0 is the nuclear envelope breakdown (NEB) in the AB cell. Error bars are 95% CI; n = 8

**Fig S4.** Generation of PKC-3 interaction mutant in SLD-2.

**A.** Alignment of the C-termini of SLD-2 proteins from the indicated nematode species. The region of interaction between *C. elegans* SLD-2 and PKC-3 is indicated in red.

**B.** Summary of the yeast two-hybrid interactions between SLD-2 mutants and PKC-3 1-219.

**C.** Yeast two-hybrid growth assays of some of the mutants described in B.

**D.** Images of PKC-3 GFP and SLD-2 mCherry. This is the same image as Fig 6D, but with increased brightness of the mcherry signal to visualise SLD-2 in the cytoplasm. Scale bar is 10  $\mu$ m.

Figure 1

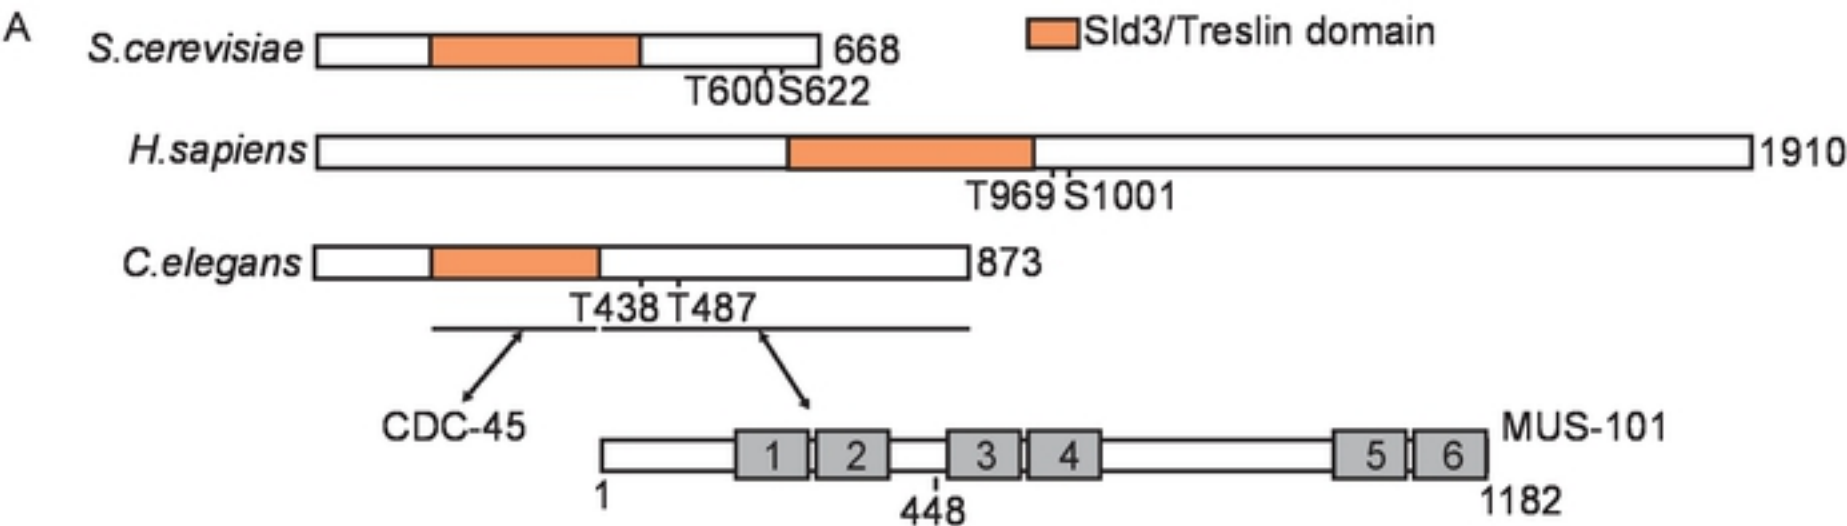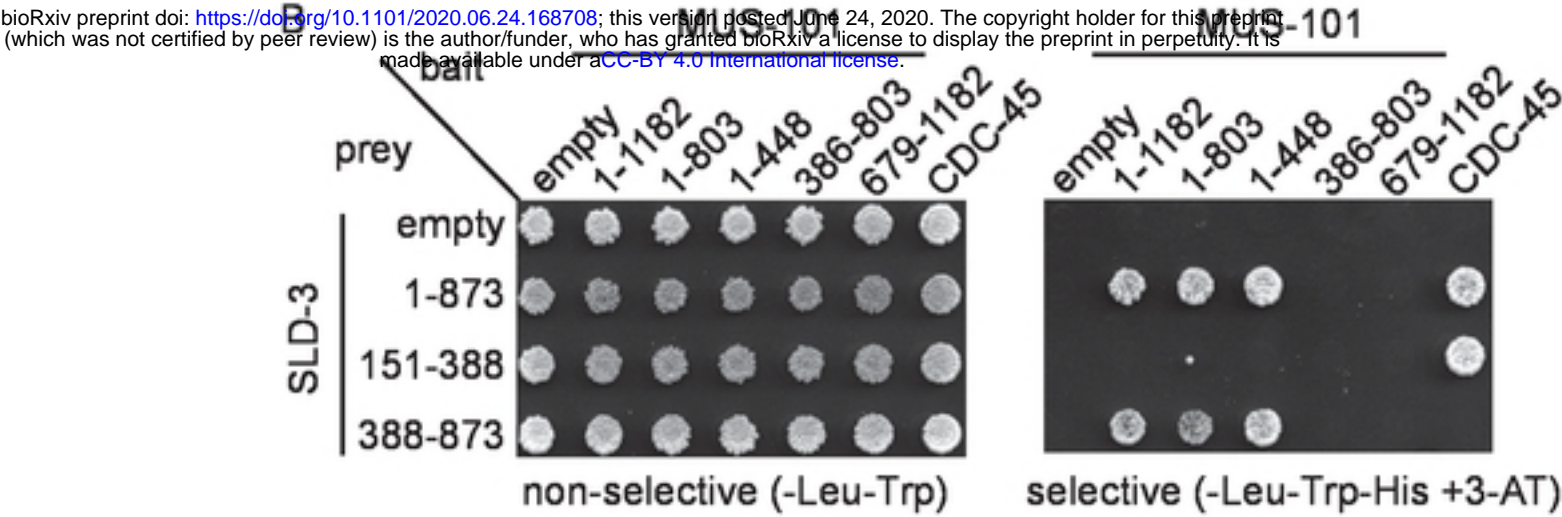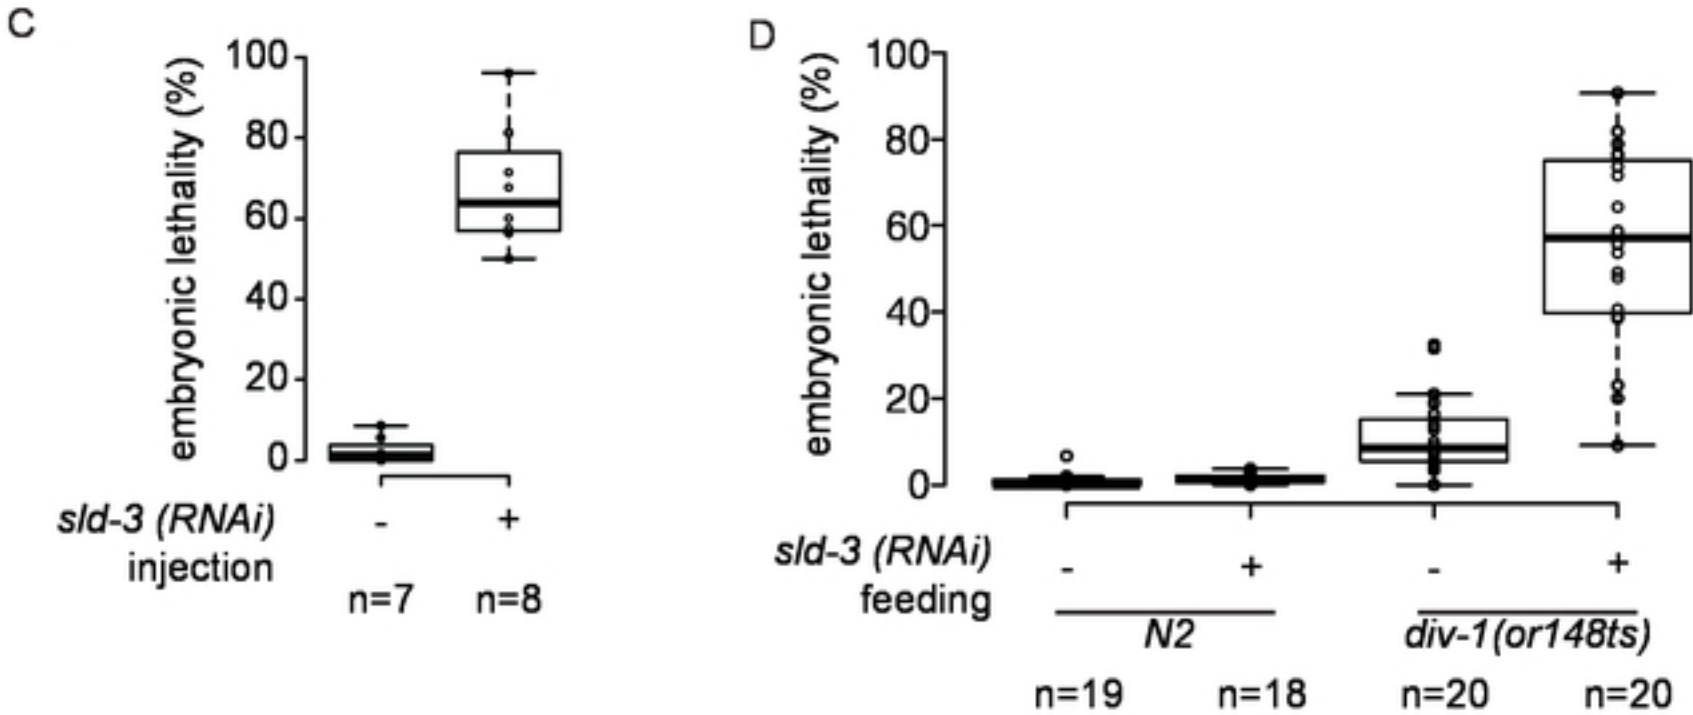

Figure 2

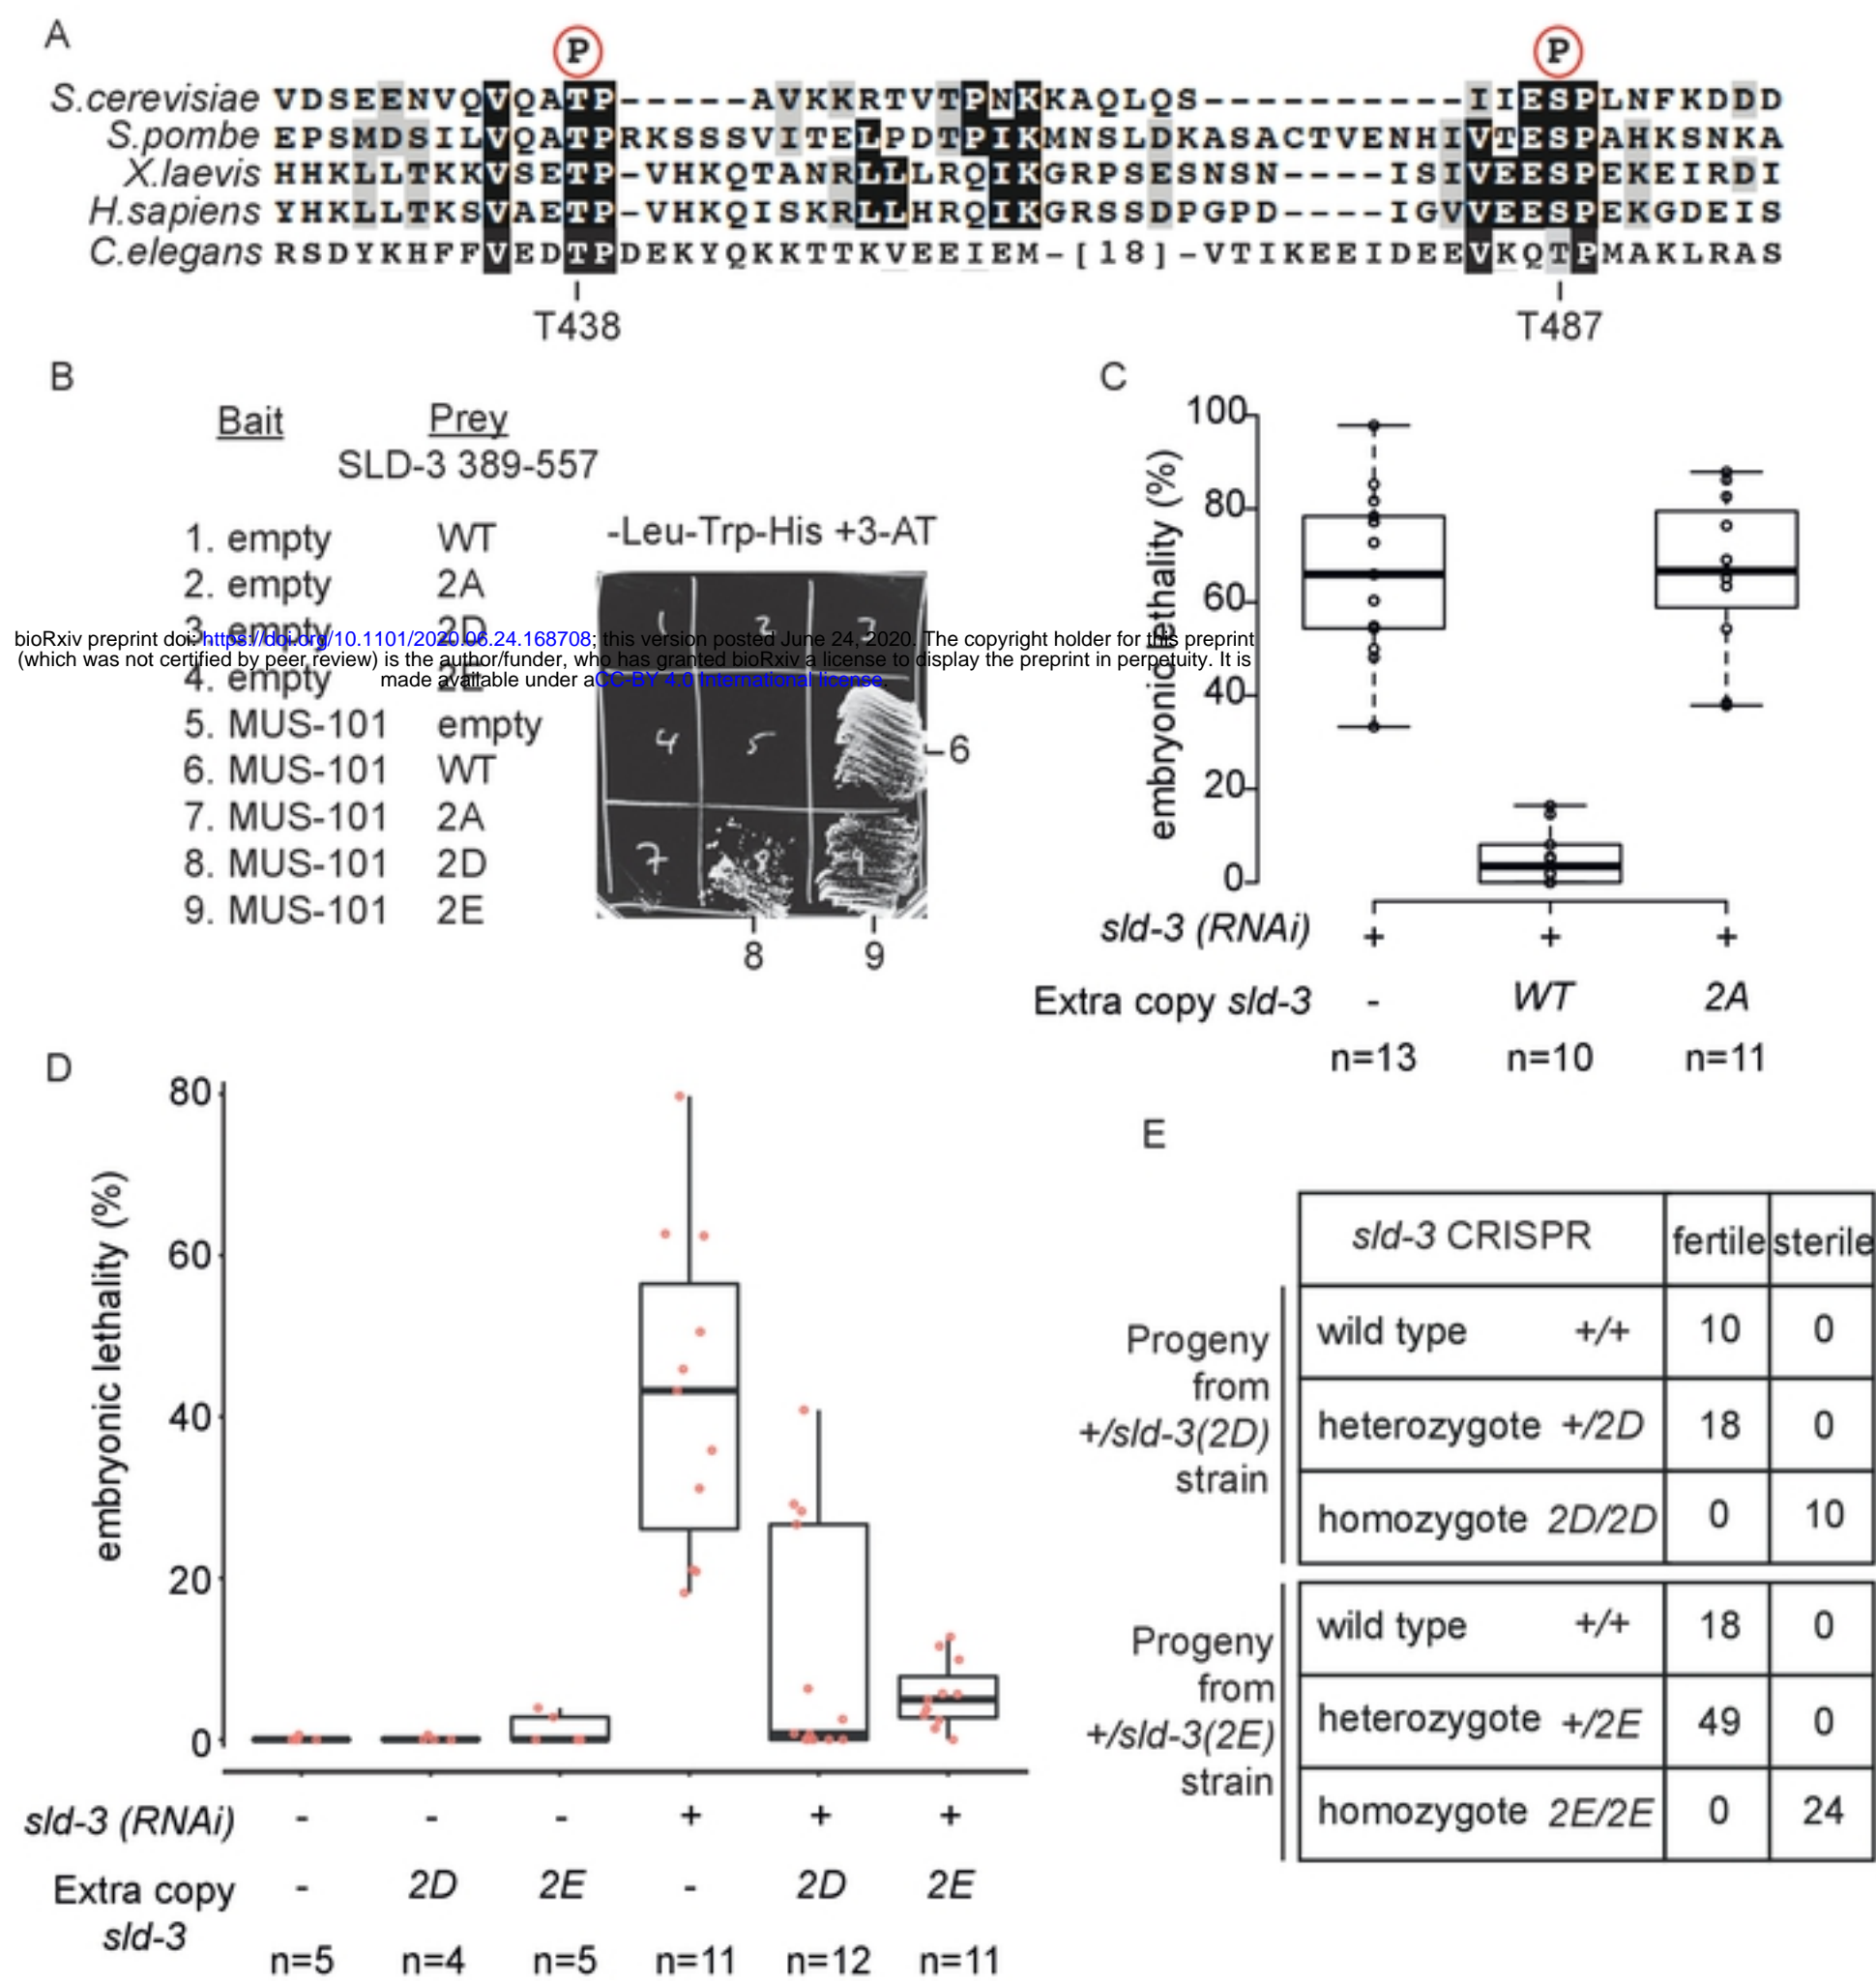



Figure 3

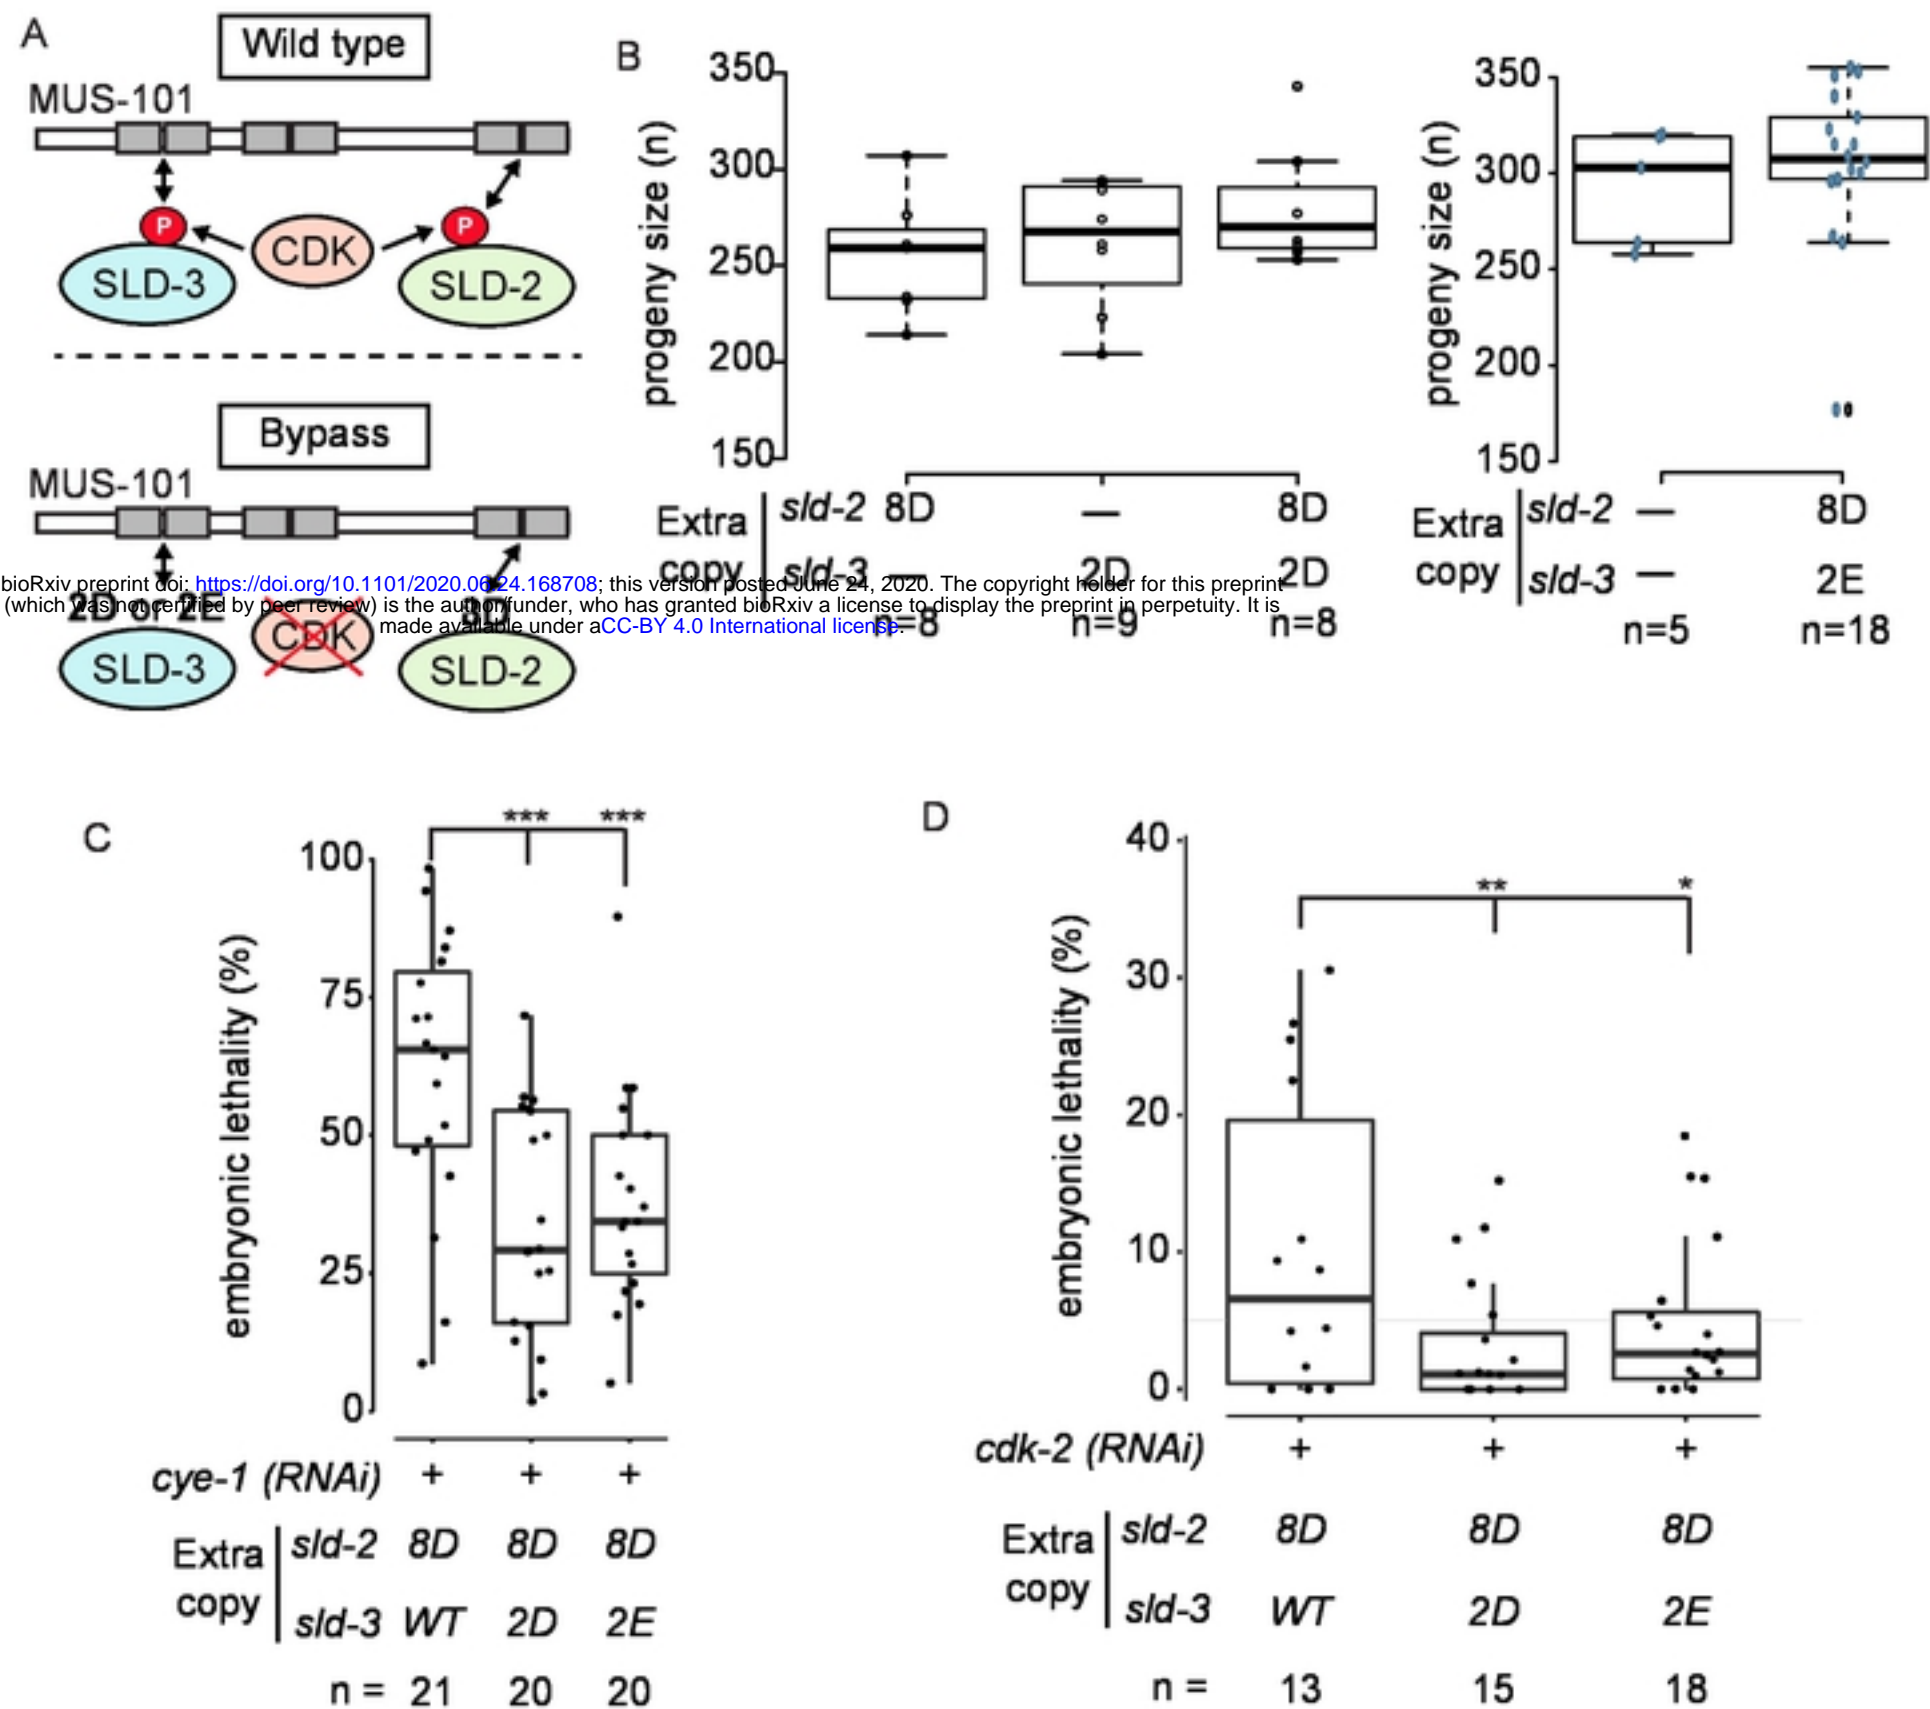

Figure 4

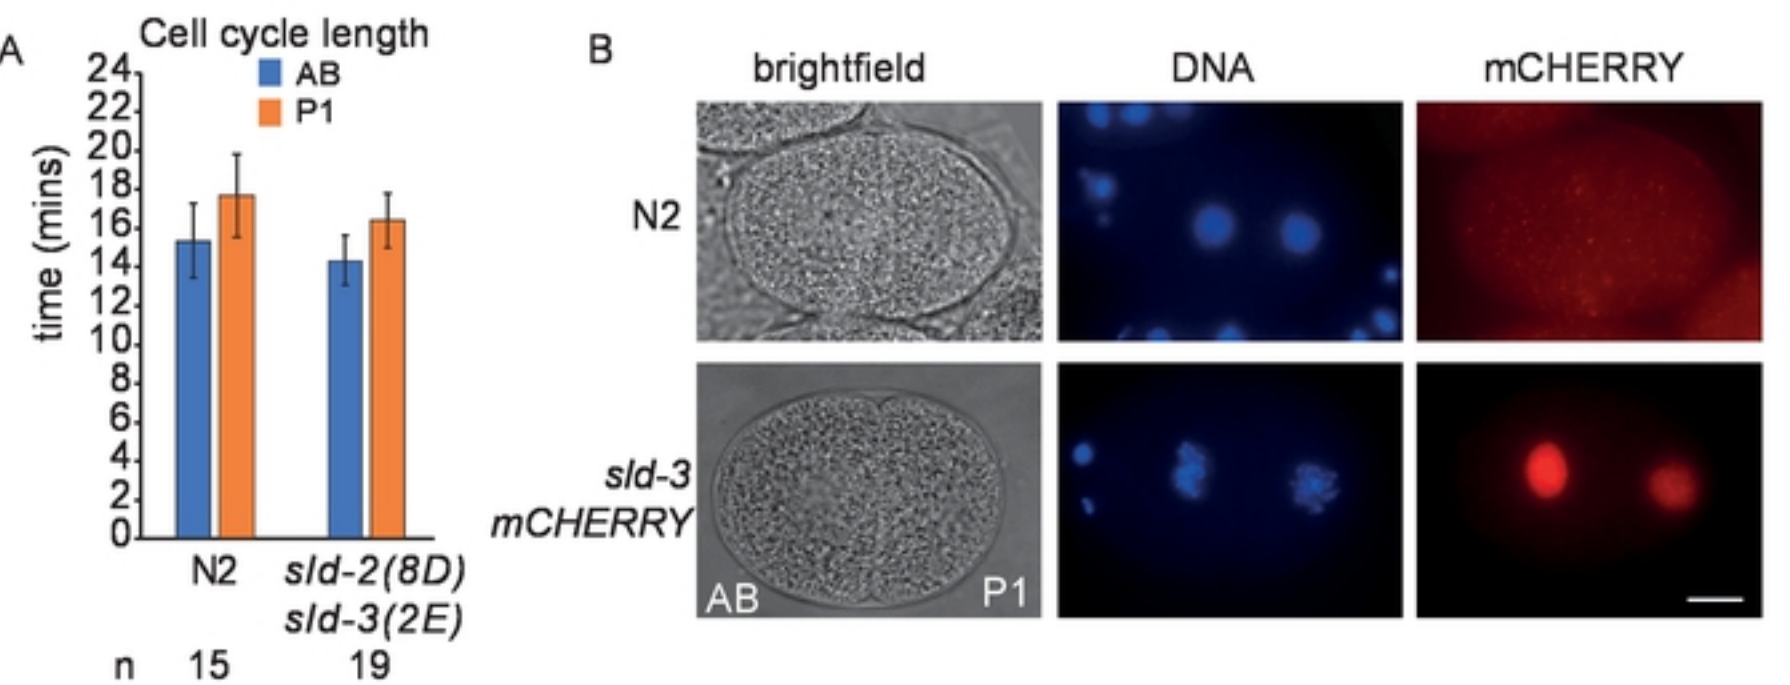

bioRxiv preprint doi: <https://doi.org/10.1101/2020.06.24.168708>; this version posted June 24, 2020. The copyright holder for this preprint (which was not certified by peer review) is the author/funder, who has granted bioRxiv a license to display the preprint in perpetuity. It is made available under aCC-BY 4.0 International license.

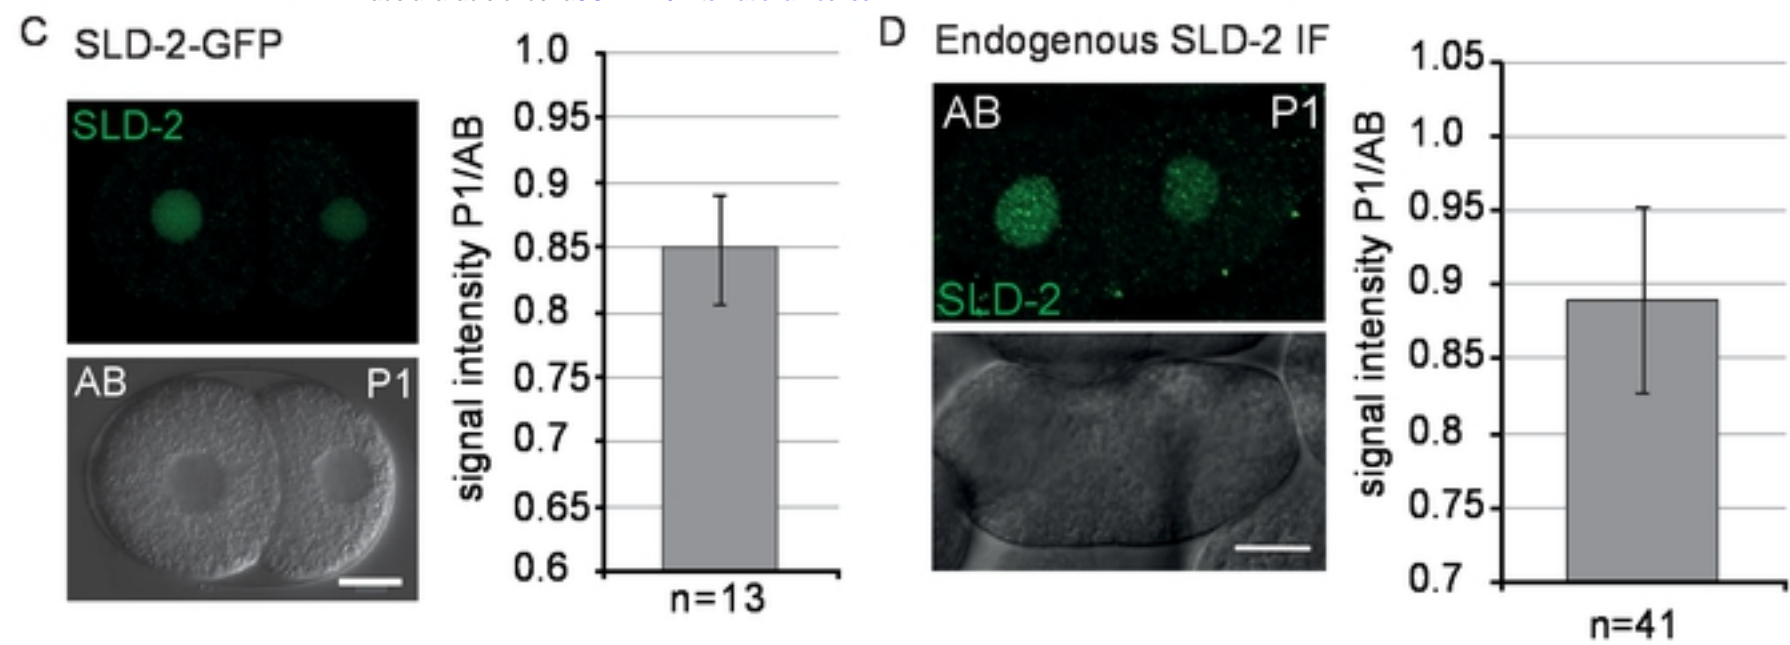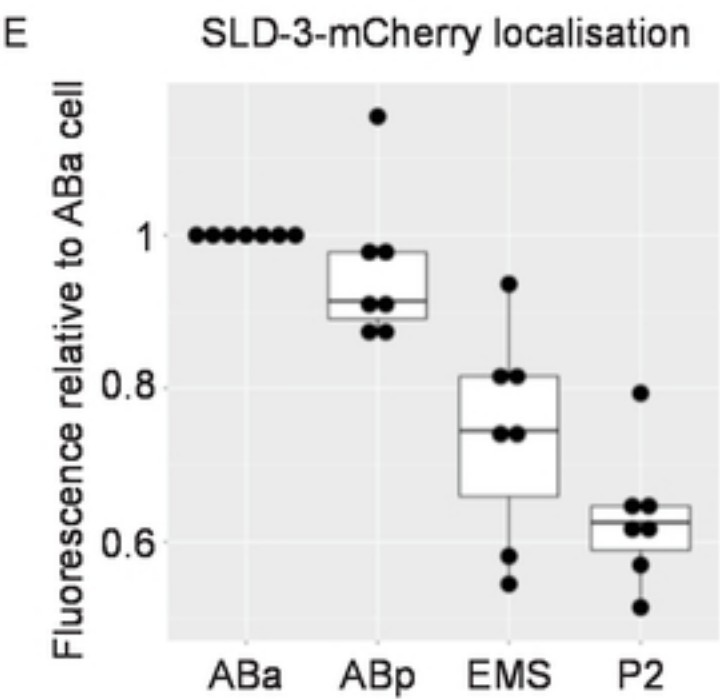

P-values

|     | ABp | EMS    | P2       |
|-----|-----|--------|----------|
| ABa | ns  | <0.005 | <0.00005 |
| ABp |     | <0.05  | <0.00005 |
| EMS |     |        | ns       |

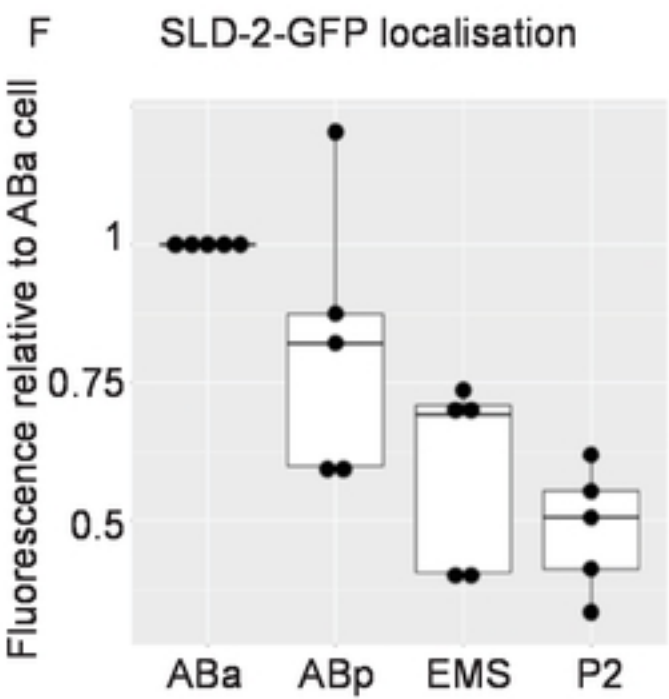

P-values

|     | ABp | EMS   | P2     |
|-----|-----|-------|--------|
| ABa | ns  | <0.05 | <0.005 |
| ABp |     | <0.05 | <0.05  |
| EMS |     |       | <0.05  |

Figure 5

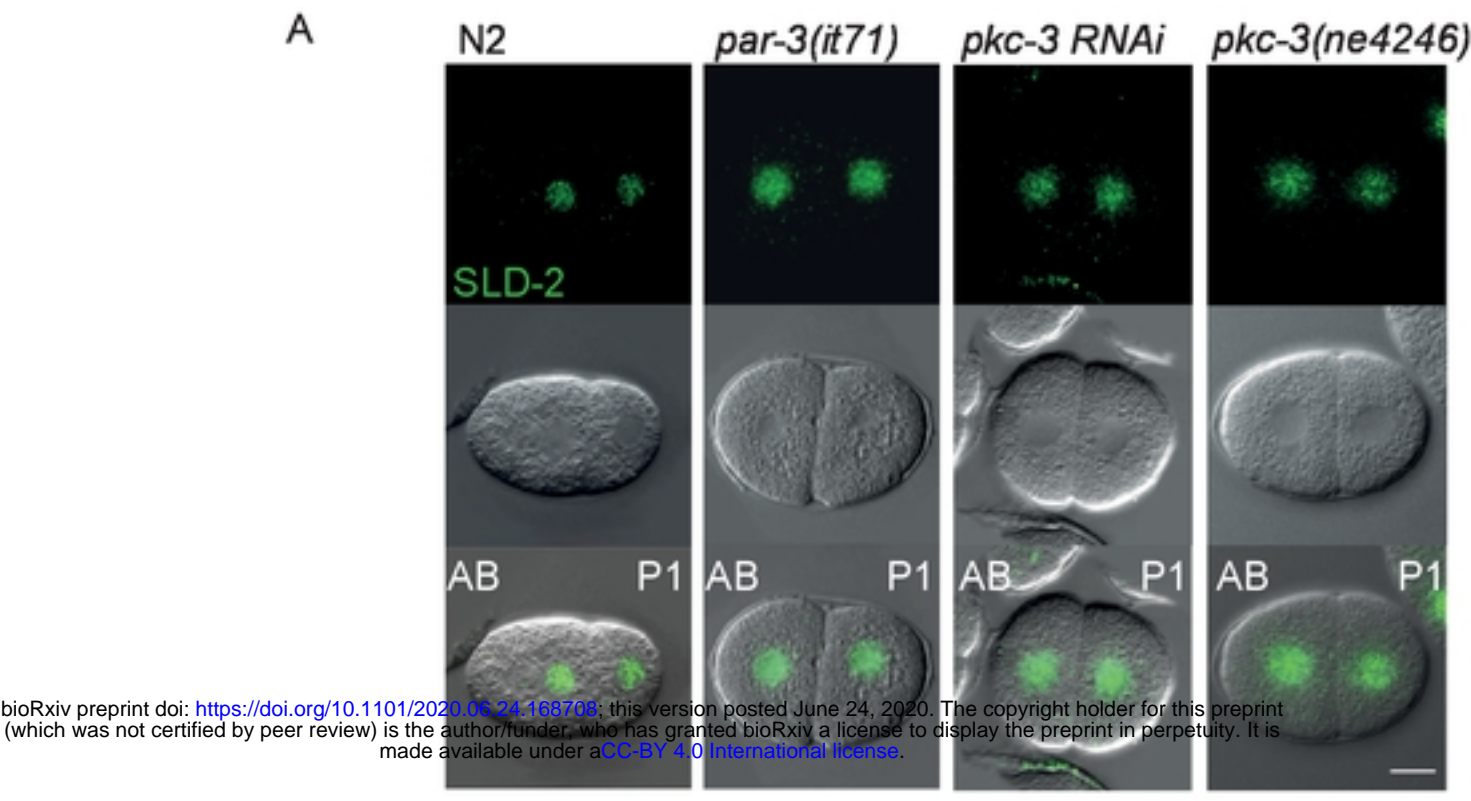

bioRxiv preprint doi: <https://doi.org/10.1101/2020.06.24.168708>; this version posted June 24, 2020. The copyright holder for this preprint (which was not certified by peer review) is the author/funder, who has granted bioRxiv a license to display the preprint in perpetuity. It is made available under aCC-BY 4.0 International license.

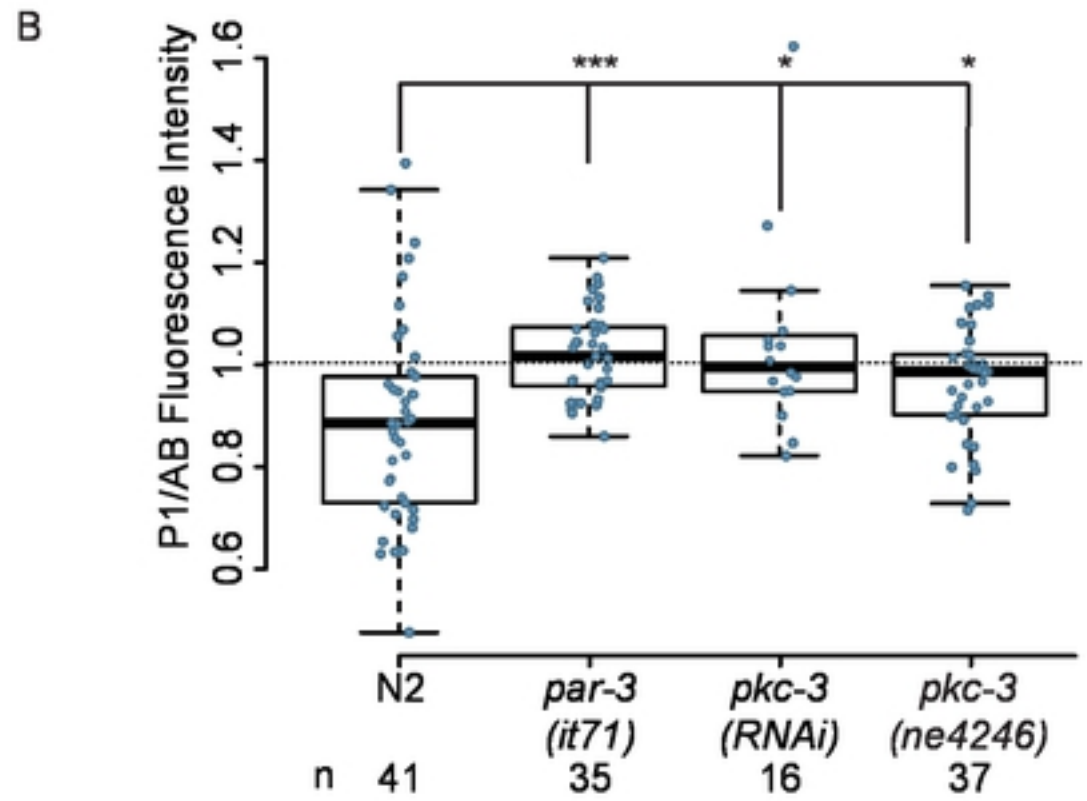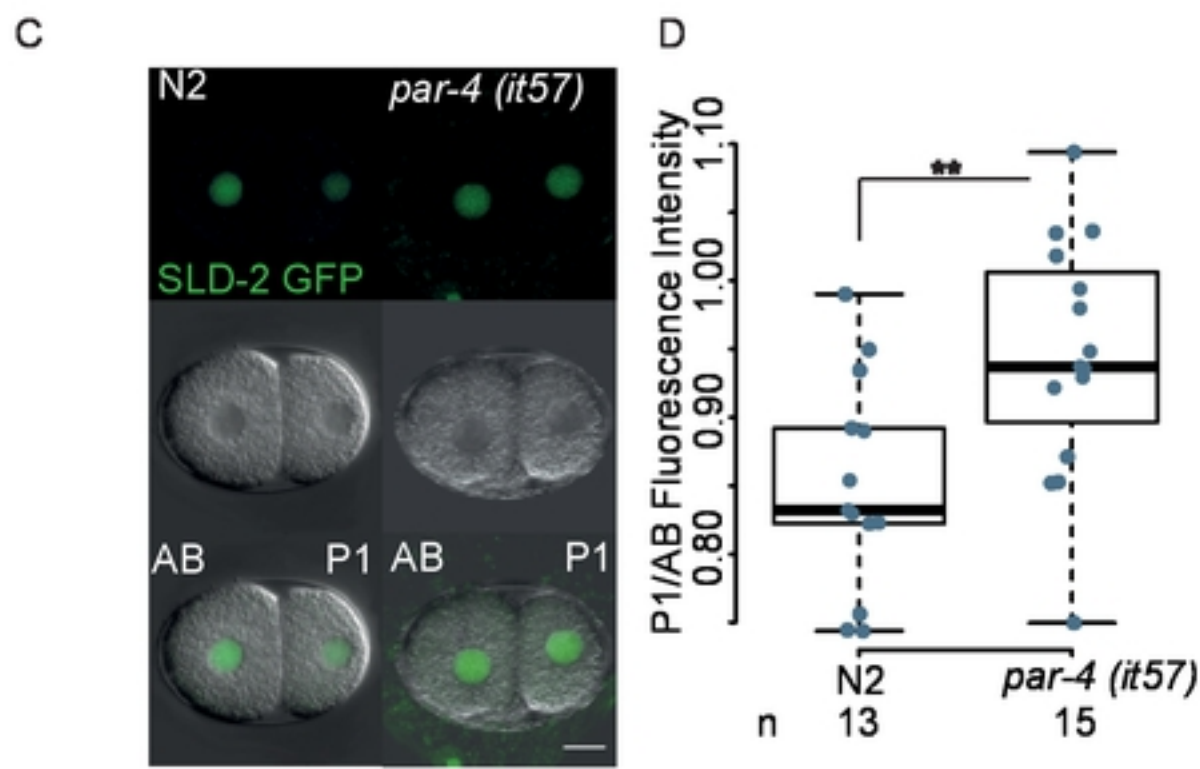



Figure 6

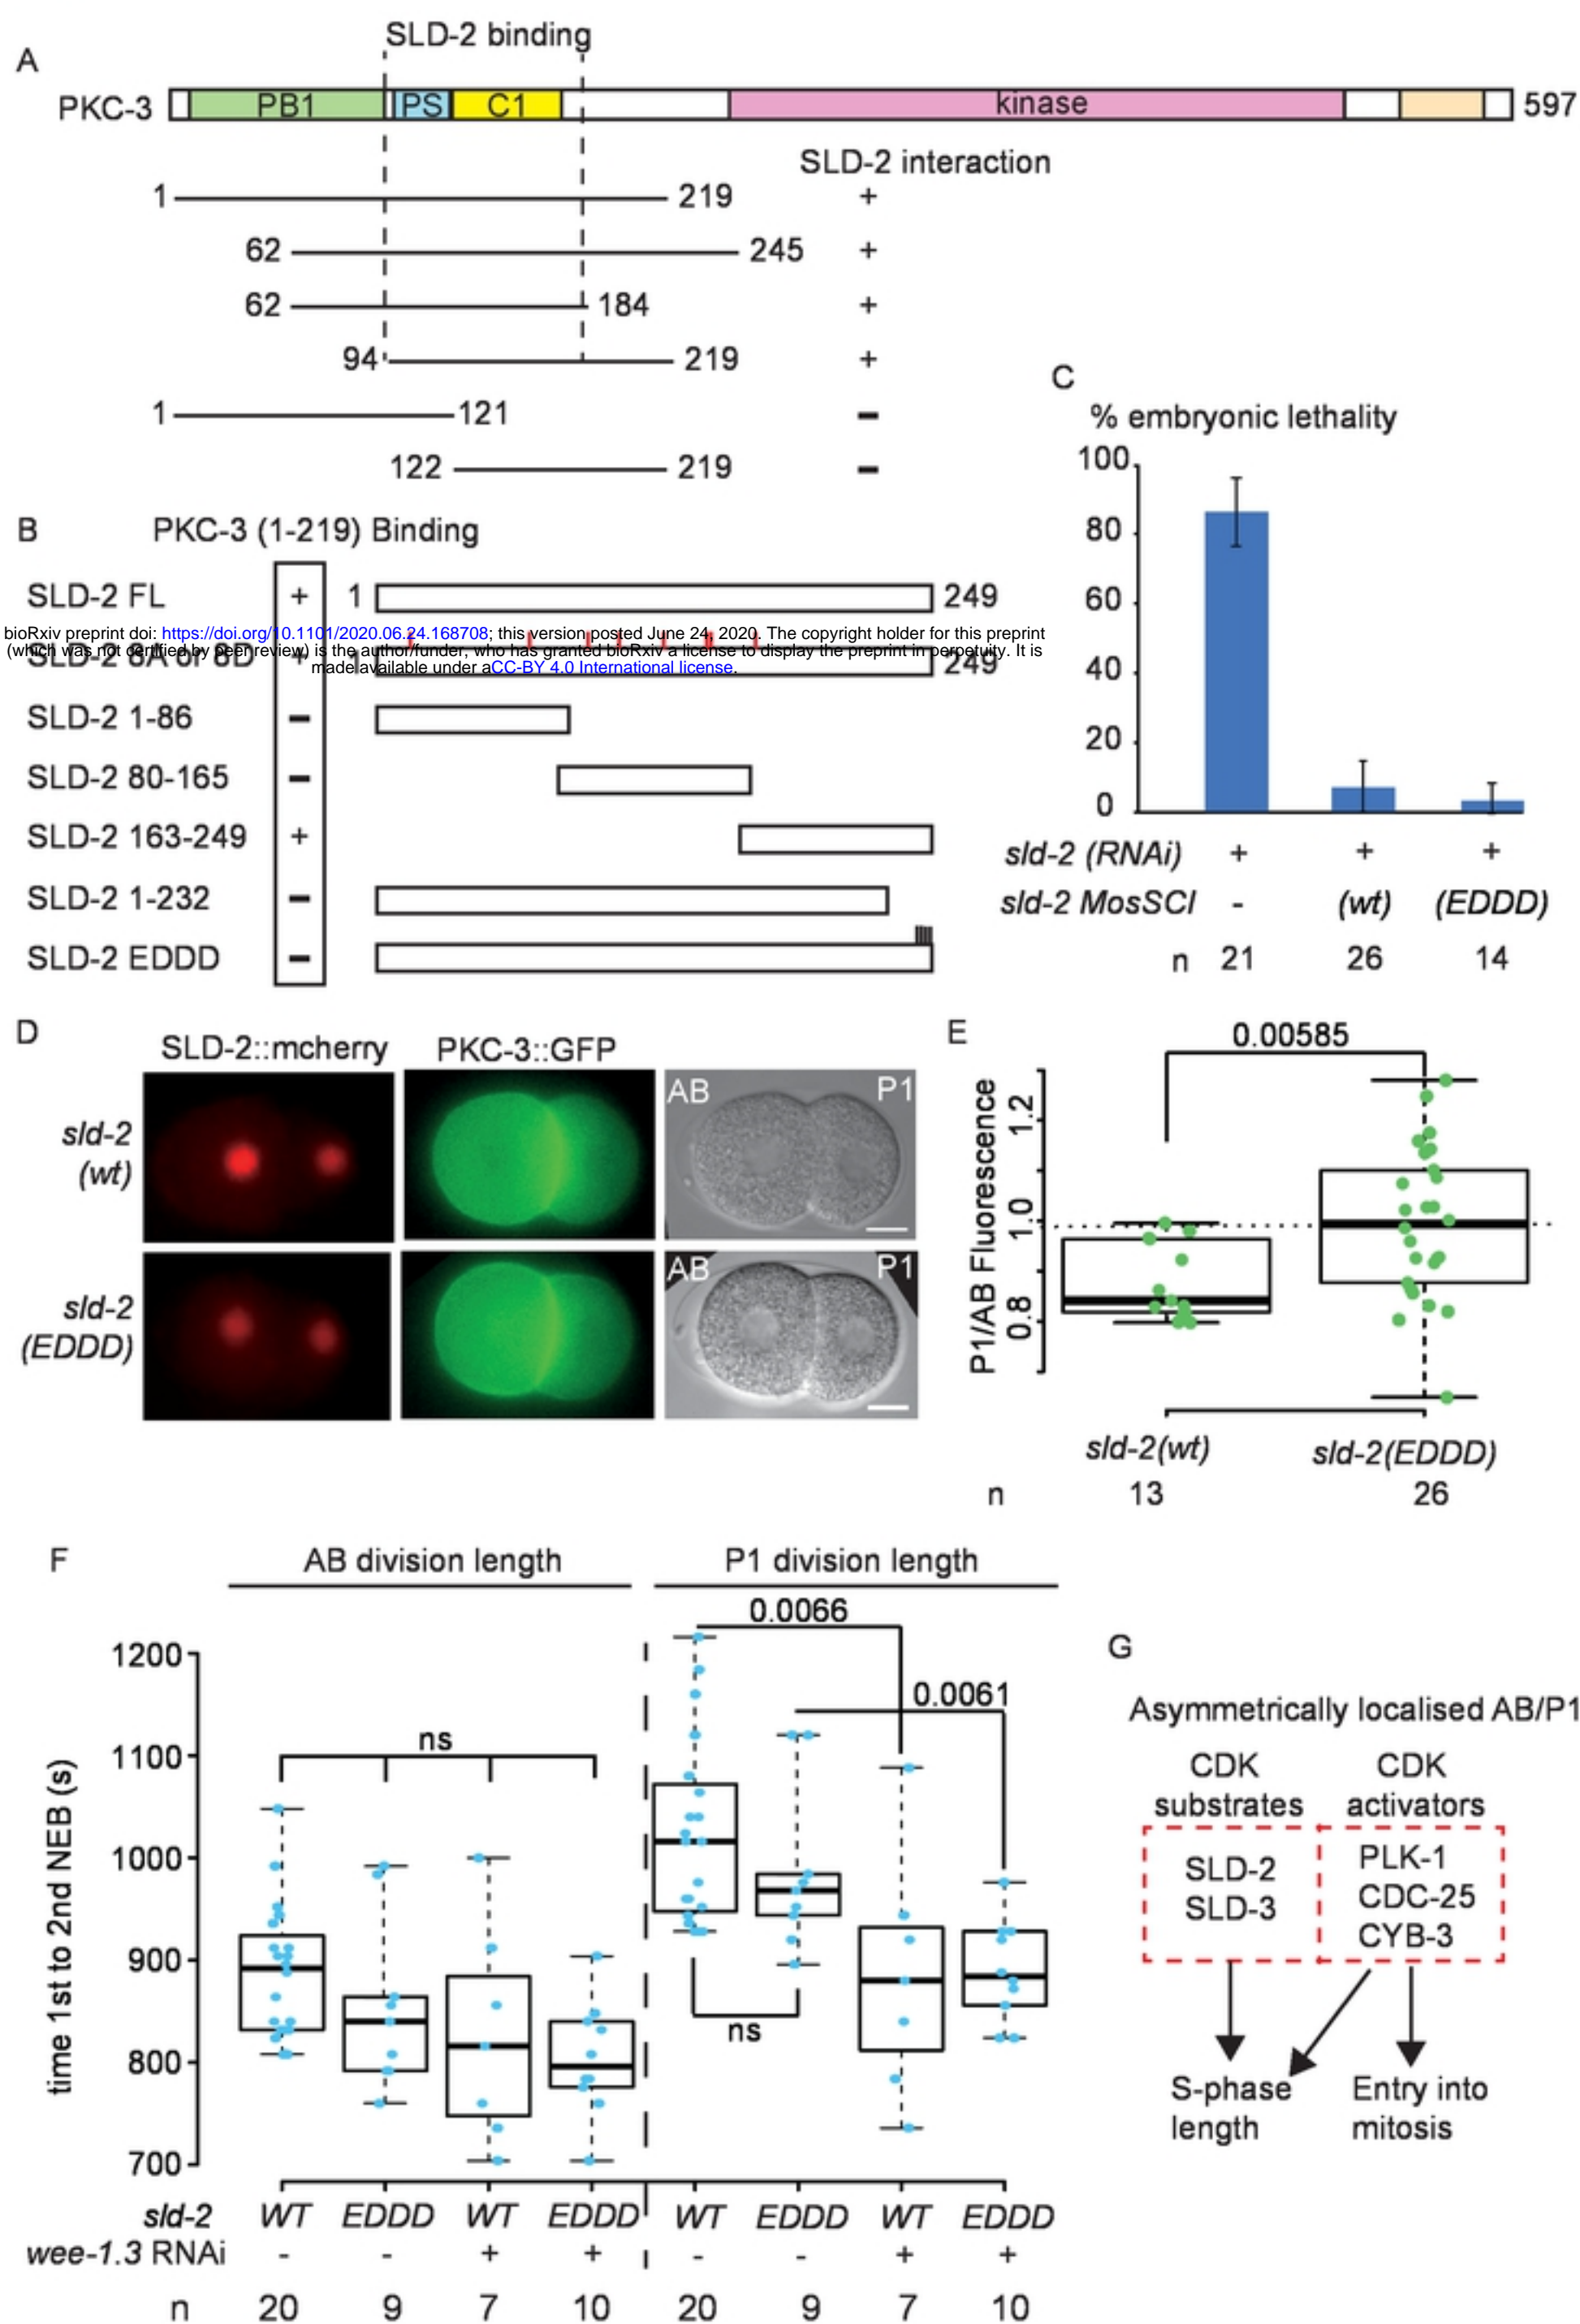

Source: https://www.biorxiv.org/content/10.1101/2020.06.24.168708v1.full.pdf
